# Supplementary material
Source: Research Square preprint supplement (doi:10.21203/rs.3.rs-8836084/v1)
Supplement: Supplementary file 1 [file 1dfbede9f65a66375c00164d.docx]

# **Radiocarbon program of Oxcal**

Plot()

{

Outlier_Model("General", T(5), U(0,4), "t");

// --- Early Stage ---

Sequence("Wulasitai Valley Early Stage")

{

Boundary("Start Wulasitai Valley Early Stage");

Phase("Wulasitai Valley Early Stage")

{

R_Date("X_F2_M3", 2718.82, 25.70)

{

Outlier("General", 0.05);

};

R_Date("W_M25", 2688.10, 21.84)

{

Outlier("General", 0.05);

};

R_Date("X_F1L7", 2675.70, 20.32)

{

Outlier("General", 0.05);

};

R_Date("W_M26", 2650.34, 21.77)

{

Outlier("General", 0.05);

};

R_Date("X_F1_M2", 2628.61, 25.49)

{

Outlier("General", 0.05);

};

Sum("Sum Wulasitai Valley Early Stage");

Interval("Interval Wulasitai Valley Early Stage");

Date("Date Wulasitai Valley Early Stage");

};

Boundary("End Wulasitai Valley Early Stage");

};

// --- Middle Phase I ---

Sequence("Wulasitai Valley Middle Phase I")

{

Boundary("Start Wulasitai Valley Middle Phase I");

Phase("Wulasitai Valley Middle Phase I")

{

R_Date("X_F2L3", 2510.95, 25.52)

{

Outlier("General", 0.05);

};

R_Date("X_F1_M6", 2497.62, 26.16)

{

Outlier("General", 0.05);

};

R_Date("X_F1L8", 2465.90, 19.75)

{

Outlier("General", 0.05);

};

Sum("Sum Wulasitai Valley Middle Phase I");

Interval("Interval Wulasitai Valley Middle Phase I");

Date("Date Wulasitai Valley Middle Phase I");

};

Boundary("End Wulasitai Valley Middle Phase I");

};

// --- Middle Phase II ---

Sequence("Wulasitai Valley Middle Phase II")

{

Boundary("Start Wulasitai Valley Middle Phase II");

Phase("Wulasitai Valley Middle Phase II")

{

R_Date("W_M12L3", 2445.33, 26.48)

{

Outlier("General", 0.05);

};

R_Date("X_M8", 2429.03, 21.36)

{

Outlier("General", 0.05);

};

R_Date("X_M2L1", 2428.64, 18.83)

{

Outlier("General", 0.05);

};

R_Date("X_M3L2", 2427.98, 19.07)

{

Outlier("General", 0.05);

};

R_Date("X_M6", 2423.84, 25.48)

{

Outlier("General", 0.05);

};

R_Date("D_F1ZD10", 2418.10, 19.75)

{

Outlier("General", 0.05);

};

R_Date("X_F1_M8", 2417.32, 24.97)

{

Outlier("General", 0.05);

};

R_Date("X_M2L3", 2403.12, 25.53)

{

Outlier("General", 0.05);

};

R_Date("X_M7", 2401.77, 25.94)

{

Outlier("General", 0.05);

};

R_Date("D_F1_K3", 2388.05, 19.96)

{

Outlier("General", 0.05);

};

R_Date("X_M3", 2383.61, 24.97)

{

Outlier("General", 0.05);

};

Sum("Sum Wulasitai Valley Middle Phase II");

Interval("Interval Wulasitai Valley Middle Phase II");

Date("Date Wulasitai Valley Middle Phase II");

};

Boundary("End Wulasitai Valley Middle Phase II");

};

// --- Late Phase I ---

Sequence("Wulasitai Valley Late Phase I")

{

Boundary("Start Wulasitai Valley Late Phase I");

Phase("Wulasitai Valley Late Phase I")

{

R_Date("X_M1", 2335.71, 19.15)

{

Outlier("General", 0.05);

};

R_Date("X_M13L2", 2329.99, 19.42)

{

Outlier("General", 0.05);

};

R_Date("X_M12L1", 2284.98, 19.40)

{

Outlier("General", 0.05);

};

R_Date("D_F1_HD1L3", 2266.84, 20.96)

{

Outlier("General", 0.05);

};

R_Date("X_M15L1", 2265.69, 24.88)

{

Outlier("General", 0.05);

};

R_Date("X_M14L3", 2265.15, 25.44)

{

Outlier("General", 0.05);

};

R_Date("X_M1L1", 2268.35, 21.86)

{

Outlier("General", 0.05);

};

R_Date("X_M15L1_2", 2255.86, 19.03)

{

Outlier("General", 0.05);

};

Sum("Sum Wulasitai Valley Late Phase I");

Interval("Interval Wulasitai Valley Late Phase I");

Date("Date Wulasitai Valley Late Phase I");

};

Boundary("End Wulasitai Valley Late Phase I");

};

// --- Late Phase II ---

Sequence("Wulasitai Valley Late Phase II")

{

Boundary("Start Wulasitai Valley Late Phase II");

Phase("Wulasitai Valley Late Phase II")

{

R_Date("X_M12L3", 2232.21, 19.14)

{

Outlier("General", 0.05);

};

R_Date("X_M4", 2213.21, 28.00)

{

Outlier("General", 0.05);

};

R_Date("X_M1L2", 2201.25, 21.26)

{

Outlier("General", 0.05);

};

R_Date("X_M9L1", 2195.76, 22.77)

{

Outlier("General", 0.05);

};

R_Date("X_M5L2", 2194.71, 24.75)

{

Outlier("General", 0.05);

};

R_Date("X_M2L1_2", 2151.91, 25.36)

{

Outlier("General", 0.05);

};

R_Date("X_M14L1", 2067.55, 24.90)

{

Outlier("General", 0.05);

};

Sum("Sum Wulasitai Valley Late Phase II");

Interval("Interval Wulasitai Valley Late Phase II");

Date("Date Wulasitai Valley Late Phase II");

};

Boundary("End Wulasitai Valley Late Phase II");

};

// --- Historical Stage I ---

Sequence("Wulasitai Valley Historical Stage I")

{

Boundary("Start Wulasitai Valley Historical Stage I");

Phase("Wulasitai Valley Historical Stage I")

{

R_Date("X_M10L1", 1965.967216, 21.0556768)

{

Outlier("General", 0.05);

};

R_Date("W_M1", 1933.107754, 24.34599177)

{

Outlier("General", 0.05);

};

R_Date("X_M11L1", 1918.042518, 18.82726945)

{

Outlier("General", 0.05);

};

Sum("Sum Wulasitai Valley Historical Stage I");

Interval("Interval Wulasitai Valley Historical Stage I");

Date("Date Wulasitai Valley Historical Stage I");

};

Boundary("End Wulasitai Valley Historical Stage I");

};

// --- Historical Stage II ---

Sequence("Wulasitai Valley Historical Stage II")

{

Boundary("Start Wulasitai Valley Historical Stage II");

Phase("Wulasitai Valley Historical Stage II")

{

R_Date("W_M17", 1774.3127, 24.10019239)

{

Outlier("General", 0.05);

};

R_Date("W_M21", 1748.947778, 20.59398527)

{

Outlier("General", 0.05);

};

R_Date("W_M18", 1728.849053, 24.15356461)

{

Outlier("General", 0.05);

};

R_Date("W_M5", 1593.893896, 24.87873402)

{

Outlier("General", 0.05);

};

Sum("Sum Wulasitai Valley Historical Stage II");

Interval("Interval Wulasitai Valley Historical Stage II");

Date("Date Wulasitai Valley Historical Stage II");

};

Boundary("End Wulasitai Valley Historical Stage II");

};

// --- Historical Stage III ---

Sequence("Wulasitai Valley Historical Stage III")

{

Boundary("Start Wulasitai Valley Historical Stage III");

Phase("Wulasitai Valley Historical Stage III")

{

R_Date("W_M8_2", 1108.601876, 27.0473617)

{

Outlier("General", 0.05);

};

R_Date("W_M9L1", 1104.97488618182, 17.5043632400702)

{

Outlier("General", 0.05);

};

R_Date("W_M8L1", 1102.65828756717, 17.9293054874669)

{

Outlier("General", 0.05);

};

R_Date("W_M8_2", 1051.270453, 24.07354769)

{

Outlier("General", 0.05);

};

Sum("Sum Wulasitai Valley Historical Stage III");

Interval("Interval Wulasitai Valley Historical Stage III");

Date("Date Wulasitai Valley Historical Stage III");

};

Boundary("End Wulasitai Valley Historical Stage III");

};

// --- Historical Stage IV ---

Sequence("Wulasitai Valley Historical Stage IV")

{

Boundary("Start Wulasitai Valley Historical Stage IV");

Phase("Wulasitai Valley Historical Stage IV")

{

R_Date("W_M7", 656.0302899, 22.45325672)

{

Outlier("General", 0.05);

};

R_Date("W_M6L1", 577.984891836313, 16.7200802561949)

{

Outlier("General", 0.05);

};

R_Date("W_M11", 551.0479302, 22.33727458)

{

Outlier("General", 0.05);

};

Sum("Sum Wulasitai Valley Historical Stage IV");

Interval("Interval Wulasitai Valley Historical Stage IV");

Date("Date Wulasitai Valley Historical Stage IV");

};

Boundary("End Wulasitai Valley Historical Stage IV");

};

# **R coding for figure 7**

**R coding for Figure 7-a**

library(ggplot2)

library(dplyr)

library(grid)

CN_facters_all2$Age <- factor(CN_facters_all2$Age)

x_rng <- range(CN_facters_all2$`average C13`, na.rm = TRUE)

y_rng <- range(CN_facters_all2$NGD10, na.rm = TRUE)

lab_df <- CN_facters_all2 %>%

group_by(Age) %>%

summarize(

.m = list(lm(NGD10 ~ `average C13`, data = cur_data())),

intercept = coef(.m[[1]])[1],

slope = coef(.m[[1]])[2],

R2 = summary(.m[[1]])$r.squared,

pearson_r = suppressWarnings(cor(`average C13`, NGD10, use = "complete.obs", method = "pearson")),

pearson_p = suppressWarnings(cor.test(`average C13`, NGD10, method = "pearson")$p.value),

spearman_rho = suppressWarnings(cor(`average C13`, NGD10, use = "complete.obs", method = "spearman")),

spearman_p = suppressWarnings(cor.test(`average C13`, NGD10, method = "spearman", exact = FALSE)$p.value),

.groups = "drop"

) %>%

mutate(

label = sprintf(

"NGD10 = %.3f + %.3f·x\nR² = %.3f\nPearson r = %.3f, p = %.3g\nSpearman ρ = %.3f, p = %.3g",

intercept, slope, R2, pearson_r, pearson_p, spearman_rho, spearman_p

)

)

ggplot(CN_facters_all2, aes(`average C13`, NGD10)) +

geom_point() +

geom_smooth(method = "lm", se = FALSE, colour = "black") +

geom_vline(xintercept = -16.5, linetype = "dashed", colour = "grey40") +

geom_hline(yintercept = 200, linetype = "dashed", colour = "grey40") +

facet_wrap(~ Age) +

coord_cartesian(xlim = x_rng, ylim = y_rng) +

geom_text(

data = lab_df,

aes(x = -Inf, y = Inf, label = label),

inherit.aes = FALSE,

hjust = -0.05, vjust = 1.05,

size = 3.8

) +

labs(x = expression(delta^{13}*C~"(VPDB, ‰)"), y = "GSP")+

theme_classic(base_size = 14)+

theme_classic(base_size = 14) +

theme(

legend.position = "right",

legend.title = element_text(face = "bold"),

legend.key.size = unit(0.6, "cm")

)

**R coding for Figure 7-b**

library(ggplot2)

library(dplyr)

library(grid)

CN_facters_all2$Age <- factor(CN_facters_all2$Age)

x_rng <- range(CN_facters_all2$`average C13`, na.rm = TRUE)

y_rng <- range(CN_facters_all2$GSP, na.rm = TRUE)

lab_df <- CN_facters_all2 %>%

group_by(Age) %>%

summarize(

.m = list(lm(GSP ~ `average C13`, data = cur_data())),

intercept = coef(.m[[1]])[1],

slope = coef(.m[[1]])[2],

R2 = summary(.m[[1]])$r.squared,

pearson_r = suppressWarnings(cor(`average C13`, GSP, use = "complete.obs", method = "pearson")),

pearson_p = suppressWarnings(cor.test(`average C13`, GSP, method = "pearson")$p.value),

spearman_rho = suppressWarnings(cor(`average C13`, GSP, use = "complete.obs", method = "spearman")),

spearman_p = suppressWarnings(cor.test(`average C13`, GSP, method = "spearman", exact = FALSE)$p.value),

.groups = "drop"

) %>%

mutate(

label = sprintf(

"GSP = %.3f + %.3f·x\nR² = %.3f\nPearson r = %.3f, p = %.3g\nSpearman ρ = %.3f, p = %.3g",

intercept, slope, R2, pearson_r, pearson_p, spearman_rho, spearman_p

)

)

ggplot(CN_facters_all2, aes(`average C13`, GSP)) +

geom_point() +

geom_smooth(method = "lm", se = FALSE, colour = "black") +

geom_vline(xintercept = -16.5, linetype = "dashed", colour = "grey40") +

geom_hline(yintercept = 200, linetype = "dashed", colour = "grey40") +

facet_wrap(~ Age) +

coord_cartesian(xlim = x_rng, ylim = y_rng) +

geom_text(

data = lab_df,

aes(x = -Inf, y = Inf, label = label),

inherit.aes = FALSE,

hjust = -0.05, vjust = 1.05,

size = 3.8

) +

labs(x = expression(delta^{13}*C~"(VPDB, ‰)"), y = "GSP")+

theme_classic(base_size = 14)+

theme_classic(base_size = 14) +

theme(

legend.position = "right",

legend.title = element_text(face = "bold"),

legend.key.size = unit(0.6, "cm")

)
