# Supplementary material
Source: Research Square preprint supplement (doi:10.21203/rs.3.rs-8836084/v1)
Supplement: Supplementary file 2 [file 41580b0baa5df6cdf673fe89.xlsx]

## Sheet: Isopote dataset for fig. 7
code	Site information	Age	d13C	d15N	Latitude	Longitude	DEM	GSP	NGD10	Reference
1	Tegiszhol	EIA-Ⅰ	-17.9	13.3	50.0942	72.7653	477.934	186.3	147	Lightfoot E, Motuzaite-Matuzeviciute G, O’Connell TC, et al (2015) How ‘Pastoral’ is Pastoralism? Dietary Diversity in Bronze Age Communities in the Central Kazakhstan Steppes. Archaeometry 57:232–249. https://doi.org/10.1111/arcm.12123
2	Tegiszhol	EIA-Ⅰ	-18.3	13.4	50.0942	72.7653	477.934	186.3	147	Lightfoot E, Motuzaite-Matuzeviciute G, O’Connell TC, et al (2015) How ‘Pastoral’ is Pastoralism? Dietary Diversity in Bronze Age Communities in the Central Kazakhstan Steppes. Archaeometry 57:232–249. https://doi.org/10.1111/arcm.12123
3	Tegiszhol	EIA-Ⅰ	-18.5	12.7	50.0942	72.7653	477.934	186.3	147	Lightfoot E, Motuzaite-Matuzeviciute G, O’Connell TC, et al (2015) How ‘Pastoral’ is Pastoralism? Dietary Diversity in Bronze Age Communities in the Central Kazakhstan Steppes. Archaeometry 57:232–249. https://doi.org/10.1111/arcm.12123
4	Tegiszhol	EIA-Ⅰ	-18.1	12.7	50.0942	72.7653	477.934	186.3	147	Lightfoot E, Motuzaite-Matuzeviciute G, O’Connell TC, et al (2015) How ‘Pastoral’ is Pastoralism? Dietary Diversity in Bronze Age Communities in the Central Kazakhstan Steppes. Archaeometry 57:232–249. https://doi.org/10.1111/arcm.12123
5	Tegiszhol	EIA-Ⅰ	-18.3	13.7	50.0942	72.7653	477.934	186.3	147	Lightfoot E, Motuzaite-Matuzeviciute G, O’Connell TC, et al (2015) How ‘Pastoral’ is Pastoralism? Dietary Diversity in Bronze Age Communities in the Central Kazakhstan Steppes. Archaeometry 57:232–249. https://doi.org/10.1111/arcm.12123
6	Tegiszhol	EIA-Ⅰ	-17.3	14.4	50.0942	72.7653	477.934	186.3	147	Lightfoot E, Motuzaite-Matuzeviciute G, O’Connell TC, et al (2015) How ‘Pastoral’ is Pastoralism? Dietary Diversity in Bronze Age Communities in the Central Kazakhstan Steppes. Archaeometry 57:232–249. https://doi.org/10.1111/arcm.12123
7	Tegiszhol	EIA-Ⅰ	-18.6	12.9	50.0942	72.7653	477.934	186.3	147	Lightfoot E, Motuzaite-Matuzeviciute G, O’Connell TC, et al (2015) How ‘Pastoral’ is Pastoralism? Dietary Diversity in Bronze Age Communities in the Central Kazakhstan Steppes. Archaeometry 57:232–249. https://doi.org/10.1111/arcm.12123
8	Tegiszhol	EIA-Ⅰ	-18.3	14.1	50.0942	72.7653	477.934	186.3	147	Lightfoot E, Motuzaite-Matuzeviciute G, O’Connell TC, et al (2015) How ‘Pastoral’ is Pastoralism? Dietary Diversity in Bronze Age Communities in the Central Kazakhstan Steppes. Archaeometry 57:232–249. https://doi.org/10.1111/arcm.12123
9	Tegiszhol	EIA-Ⅰ	-17.7	13.7	50.0942	72.7653	477.934	186.3	147	Lightfoot E, Motuzaite-Matuzeviciute G, O’Connell TC, et al (2015) How ‘Pastoral’ is Pastoralism? Dietary Diversity in Bronze Age Communities in the Central Kazakhstan Steppes. Archaeometry 57:232–249. https://doi.org/10.1111/arcm.12123
10	Tegiszhol	EIA-Ⅰ	-18.1	12.9	50.0942	72.7653	477.934	186.3	147	Lightfoot E, Motuzaite-Matuzeviciute G, O’Connell TC, et al (2015) How ‘Pastoral’ is Pastoralism? Dietary Diversity in Bronze Age Communities in the Central Kazakhstan Steppes. Archaeometry 57:232–249. https://doi.org/10.1111/arcm.12123
11	Tegiszhol	EIA-Ⅰ	-16.4	13	50.0942	72.7653	477.934	186.3	147	Lightfoot E, Motuzaite-Matuzeviciute G, O’Connell TC, et al (2015) How ‘Pastoral’ is Pastoralism? Dietary Diversity in Bronze Age Communities in the Central Kazakhstan Steppes. Archaeometry 57:232–249. https://doi.org/10.1111/arcm.12123
12	Akbeit	EIA-Ⅰ	-17.95	14.54	49.0045	73.8931	819.387	217.1	133	Ananyevskaya E, Aytqaly AK, Beisenov AZ, et al (2018) Early indicators to C4 plant consumption in central Kazakhstan during the Final Bronze Age and Early Iron Age based on stable isotope analysis of human and animal bone collagen. Archaeological Research in Asia 15:157–173. https://doi.org/10.1016/j.ara.2017.12.002
13	Karashoky	EIA-Ⅰ	-16.14	14.59	49.0045	73.8931	819.387	217.1	133	Ananyevskaya E, Aytqaly AK, Beisenov AZ, et al (2018) Early indicators to C4 plant consumption in central Kazakhstan during the Final Bronze Age and Early Iron Age based on stable isotope analysis of human and animal bone collagen. Archaeological Research in Asia 15:157–173. https://doi.org/10.1016/j.ara.2017.12.002
14	Karashoky	EIA-Ⅰ	-18.01	15.12	49.0045	73.8931	819.387	217.1	133	Ananyevskaya E, Aytqaly AK, Beisenov AZ, et al (2018) Early indicators to C4 plant consumption in central Kazakhstan during the Final Bronze Age and Early Iron Age based on stable isotope analysis of human and animal bone collagen. Archaeological Research in Asia 15:157–173. https://doi.org/10.1016/j.ara.2017.12.002
15	Karashoky	EIA-Ⅰ	-17.76	15.05	49.0045	73.8931	819.387	217.1	133	Ananyevskaya E, Aytqaly AK, Beisenov AZ, et al (2018) Early indicators to C4 plant consumption in central Kazakhstan during the Final Bronze Age and Early Iron Age based on stable isotope analysis of human and animal bone collagen. Archaeological Research in Asia 15:157–173. https://doi.org/10.1016/j.ara.2017.12.002
16	Myrzhyk 6	EIA-Ⅰ	-16.79	15.24	48.6767	73.4285	731.308	179	143	Ananyevskaya E, Aytqaly AK, Beisenov AZ, et al (2018) Early indicators to C4 plant consumption in central Kazakhstan during the Final Bronze Age and Early Iron Age based on stable isotope analysis of human and animal bone collagen. Archaeological Research in Asia 15:157–173. https://doi.org/10.1016/j.ara.2017.12.002
17	Bakybulak	EIA-Ⅰ	-18.35	13.61	48.2295	75.3501	787.659	133.3	143	Ananyevskaya E, Aytqaly AK, Beisenov AZ, et al (2018) Early indicators to C4 plant consumption in central Kazakhstan during the Final Bronze Age and Early Iron Age based on stable isotope analysis of human and animal bone collagen. Archaeological Research in Asia 15:157–173. https://doi.org/10.1016/j.ara.2017.12.002
18	Tandaily	EIA-Ⅰ	-19.47	13.58	48.9978	75.0203	869.721	176.8	131	Ananyevskaya E, Aytqaly AK, Beisenov AZ, et al (2018) Early indicators to C4 plant consumption in central Kazakhstan during the Final Bronze Age and Early Iron Age based on stable isotope analysis of human and animal bone collagen. Archaeological Research in Asia 15:157–173. https://doi.org/10.1016/j.ara.2017.12.002
19	Kyzylshilik	EIA-Ⅰ	-22.1	13.51	50.2002	75.6344	617.952	221.2	136	Ananyevskaya E, Aytqaly AK, Beisenov AZ, et al (2018) Early indicators to C4 plant consumption in central Kazakhstan during the Final Bronze Age and Early Iron Age based on stable isotope analysis of human and animal bone collagen. Archaeological Research in Asia 15:157–173. https://doi.org/10.1016/j.ara.2017.12.002
20	Baike 2	EIA-Ⅰ	-19.08	14.83	48.9635	75.164	981.319	207.7	124	Ananyevskaya E, Aytqaly AK, Beisenov AZ, et al (2018) Early indicators to C4 plant consumption in central Kazakhstan during the Final Bronze Age and Early Iron Age based on stable isotope analysis of human and animal bone collagen. Archaeological Research in Asia 15:157–173. https://doi.org/10.1016/j.ara.2017.12.002
21	Karakemer	EIA-Ⅰ	-17.88	14.9	48.6538	74.8374	973.757	181.9	127	Ananyevskaya E, Aytqaly AK, Beisenov AZ, et al (2018) Early indicators to C4 plant consumption in central Kazakhstan during the Final Bronze Age and Early Iron Age based on stable isotope analysis of human and animal bone collagen. Archaeological Research in Asia 15:157–173. https://doi.org/10.1016/j.ara.2017.12.002
22	Zevakinskiy	EIA-Ⅰ	-12.8	10.7	50.2249	81.8368	312.016	202.8	155	Narasimhan VM, Patterson N, Moorjani P, et al (2018) The genomic formation of South and Central Asia. Biorxiv 292581
23	Uibat V	EIA-Ⅰ	-15.9	11.5	53.6507	90.3041	766.697	290.6	112	Svyatko SV, Schulting RJ, Papin D, Reimer PJ (2021) MILLET CONSUMPTION IN SIBERIA PRIOR TO MID-SECOND MILLENNIUM BC? A REVIEW OF RECENT DEVELOPMENTS. Radiocarbon 63:1547–1554. https://doi.org/10.1017/RDC.2021.53
24	Grishkin Log 1	EIA-Ⅰ	-17.3	12	54.5711	90.7826	287.609	262	133	Svyatko SV, Schulting RJ, Papin D, Reimer PJ (2021) MILLET CONSUMPTION IN SIBERIA PRIOR TO MID-SECOND MILLENNIUM BC? A REVIEW OF RECENT DEVELOPMENTS. Radiocarbon 63:1547–1554. https://doi.org/10.1017/RDC.2021.53
25	Grishkin Log 1	EIA-Ⅰ	-18.8	11.1	54.5711	90.7826	287.609	262	133	Svyatko SV, Schulting RJ, Papin D, Reimer PJ (2021) MILLET CONSUMPTION IN SIBERIA PRIOR TO MID-SECOND MILLENNIUM BC? A REVIEW OF RECENT DEVELOPMENTS. Radiocarbon 63:1547–1554. https://doi.org/10.1017/RDC.2021.53
26	Nurilkov Ulus	EIA-Ⅰ	-13.2	12.6	53.6085	91.4873	317.824	299.3	138	Svyatko SV, Schulting RJ, Papin D, Reimer PJ (2021) MILLET CONSUMPTION IN SIBERIA PRIOR TO MID-SECOND MILLENNIUM BC? A REVIEW OF RECENT DEVELOPMENTS. Radiocarbon 63:1547–1554. https://doi.org/10.1017/RDC.2021.53
27	Okunev Ulus	EIA-Ⅰ	-14.8	11.6	53.5568	90.1951	761.489	318.8	106	Svyatko SV, Schulting RJ, Papin D, Reimer PJ (2021) MILLET CONSUMPTION IN SIBERIA PRIOR TO MID-SECOND MILLENNIUM BC? A REVIEW OF RECENT DEVELOPMENTS. Radiocarbon 63:1547–1554. https://doi.org/10.1017/RDC.2021.53
28	Okunev Ulus	EIA-Ⅰ	-16.8	12.5	53.5568	90.1951	761.489	318.8	106	Svyatko SV, Schulting RJ, Papin D, Reimer PJ (2021) MILLET CONSUMPTION IN SIBERIA PRIOR TO MID-SECOND MILLENNIUM BC? A REVIEW OF RECENT DEVELOPMENTS. Radiocarbon 63:1547–1554. https://doi.org/10.1017/RDC.2021.53
29	Okunev Ulus	EIA-Ⅰ	-17.1	10.4	53.5568	90.1951	761.489	318.8	106	Svyatko SV, Schulting RJ, Papin D, Reimer PJ (2021) MILLET CONSUMPTION IN SIBERIA PRIOR TO MID-SECOND MILLENNIUM BC? A REVIEW OF RECENT DEVELOPMENTS. Radiocarbon 63:1547–1554. https://doi.org/10.1017/RDC.2021.53
30	Okunev Ulus	EIA-Ⅰ	-15.3	12.8	53.5568	90.1951	761.489	318.8	106	Svyatko SV, Schulting RJ, Papin D, Reimer PJ (2021) MILLET CONSUMPTION IN SIBERIA PRIOR TO MID-SECOND MILLENNIUM BC? A REVIEW OF RECENT DEVELOPMENTS. Radiocarbon 63:1547–1554. https://doi.org/10.1017/RDC.2021.53
31	Podgornoye Ozero	EIA-Ⅰ	-17.4	10.2	54.5205	90.9145	492.693	268.1	122	Svyatko SV, Schulting RJ, Papin D, Reimer PJ (2021) MILLET CONSUMPTION IN SIBERIA PRIOR TO MID-SECOND MILLENNIUM BC? A REVIEW OF RECENT DEVELOPMENTS. Radiocarbon 63:1547–1554. https://doi.org/10.1017/RDC.2021.53
32	Podgornoye Ozero	EIA-Ⅰ	-19.1	11.3	54.5205	90.9145	492.693	268.1	122	Svyatko SV, Schulting RJ, Papin D, Reimer PJ (2021) MILLET CONSUMPTION IN SIBERIA PRIOR TO MID-SECOND MILLENNIUM BC? A REVIEW OF RECENT DEVELOPMENTS. Radiocarbon 63:1547–1554. https://doi.org/10.1017/RDC.2021.53
33	Podgornoye Ozero	EIA-Ⅰ	-18.9	11.2	54.5205	90.9145	492.693	268.1	122	Svyatko SV, Schulting RJ, Papin D, Reimer PJ (2021) MILLET CONSUMPTION IN SIBERIA PRIOR TO MID-SECOND MILLENNIUM BC? A REVIEW OF RECENT DEVELOPMENTS. Radiocarbon 63:1547–1554. https://doi.org/10.1017/RDC.2021.53
34	Podgornoye Ozero	EIA-Ⅰ	-16.5	11.1	54.5205	90.9145	492.693	268.1	122	Svyatko SV, Schulting RJ, Papin D, Reimer PJ (2021) MILLET CONSUMPTION IN SIBERIA PRIOR TO MID-SECOND MILLENNIUM BC? A REVIEW OF RECENT DEVELOPMENTS. Radiocarbon 63:1547–1554. https://doi.org/10.1017/RDC.2021.53
35	Saragash Ozero	EIA-Ⅰ	-18.8	10.6	54.6908	90.7094	274.227	245.5	133	Svyatko SV, Schulting RJ, Papin D, Reimer PJ (2021) MILLET CONSUMPTION IN SIBERIA PRIOR TO MID-SECOND MILLENNIUM BC? A REVIEW OF RECENT DEVELOPMENTS. Radiocarbon 63:1547–1554. https://doi.org/10.1017/RDC.2021.53
36	Saragash	EIA-Ⅰ	-15.4	11.5	54.7189	90.7693	450.913	284.2	122	Svyatko SV, Schulting RJ, Papin D, Reimer PJ (2021) MILLET CONSUMPTION IN SIBERIA PRIOR TO MID-SECOND MILLENNIUM BC? A REVIEW OF RECENT DEVELOPMENTS. Radiocarbon 63:1547–1554. https://doi.org/10.1017/RDC.2021.53
37	Saragash	EIA-Ⅰ	-16.7	11.8	54.7189	90.7693	450.913	284.2	122	Svyatko SV, Schulting RJ, Papin D, Reimer PJ (2021) MILLET CONSUMPTION IN SIBERIA PRIOR TO MID-SECOND MILLENNIUM BC? A REVIEW OF RECENT DEVELOPMENTS. Radiocarbon 63:1547–1554. https://doi.org/10.1017/RDC.2021.53
38	Verhniy Askiz I	EIA-Ⅰ	-17.7	11	53.1826	90.2114	498.33	308	127	Svyatko SV, Schulting RJ, Papin D, Reimer PJ (2021) MILLET CONSUMPTION IN SIBERIA PRIOR TO MID-SECOND MILLENNIUM BC? A REVIEW OF RECENT DEVELOPMENTS. Radiocarbon 63:1547–1554. https://doi.org/10.1017/RDC.2021.53
39	Yarki II	EIA-Ⅰ	-17.7	11.9	54.4352	91.0468	509.048	311.3	122	Svyatko SV, Schulting RJ, Papin D, Reimer PJ (2021) MILLET CONSUMPTION IN SIBERIA PRIOR TO MID-SECOND MILLENNIUM BC? A REVIEW OF RECENT DEVELOPMENTS. Radiocarbon 63:1547–1554. https://doi.org/10.1017/RDC.2021.53
40	Yarki II	EIA-Ⅰ	-18.2	11.2	54.4352	91.0468	509.048	311.3	122	Svyatko SV, Schulting RJ, Papin D, Reimer PJ (2021) MILLET CONSUMPTION IN SIBERIA PRIOR TO MID-SECOND MILLENNIUM BC? A REVIEW OF RECENT DEVELOPMENTS. Radiocarbon 63:1547–1554. https://doi.org/10.1017/RDC.2021.53
41	Chap I	EIA-Ⅰ	-13.92	12.23	42.2271	75.8868	1934.64	214.5	140	Matuzeviciute GM, Ananyevskaya E, Sakalauskaite J, et al (2022) The integration of millet into the diet of Central Asian populations in the third millennium BC. Antiquity 96:560–574. https://doi.org/10.15184/aqy.2022.23
42	Chap I	EIA-Ⅰ	-18.71	11.52	42.2271	75.8868	1934.64	214.5	140	Matuzeviciute GM, Ananyevskaya E, Sakalauskaite J, et al (2022) The integration of millet into the diet of Central Asian populations in the third millennium BC. Antiquity 96:560–574. https://doi.org/10.15184/aqy.2022.23
43	Chap I	EIA-Ⅰ	-18.42	11.34	42.2271	75.8868	1934.64	214.5	140	Matuzeviciute GM, Ananyevskaya E, Sakalauskaite J, et al (2022) The integration of millet into the diet of Central Asian populations in the third millennium BC. Antiquity 96:560–574. https://doi.org/10.15184/aqy.2022.23
44	Chinge Tey I	EIA-Ⅰ	-15.2	11.1	52.0347	93.4771	862.864	392.8	119	Oleszczak L, Pokutta D, Chugunov K, Götherström A (2023) The food culture of the Iron Age nomadic elite from the ‘Valley of the Kings’ in Tuva: radiocarbon dating, stable carbon and nitrogen analysis of the Chinge Tey barrows (Turan-Uyuk Basin, Russia). Journal of Archaeological Science: Reports 51:104186. https://doi.org/10.1016/j.jasrep.2023.104186
45	Chinge Tey I	EIA-Ⅰ	-15.3	11.1	52.0347	93.4771	862.864	392.8	119	Oleszczak L, Pokutta D, Chugunov K, Götherström A (2023) The food culture of the Iron Age nomadic elite from the ‘Valley of the Kings’ in Tuva: radiocarbon dating, stable carbon and nitrogen analysis of the Chinge Tey barrows (Turan-Uyuk Basin, Russia). Journal of Archaeological Science: Reports 51:104186. https://doi.org/10.1016/j.jasrep.2023.104186
46	Chinge Tey I	EIA-Ⅰ	-15.8	11.2	52.0347	93.4771	862.864	392.8	119	Oleszczak L, Pokutta D, Chugunov K, Götherström A (2023) The food culture of the Iron Age nomadic elite from the ‘Valley of the Kings’ in Tuva: radiocarbon dating, stable carbon and nitrogen analysis of the Chinge Tey barrows (Turan-Uyuk Basin, Russia). Journal of Archaeological Science: Reports 51:104186. https://doi.org/10.1016/j.jasrep.2023.104186
47	Chinge Tey I	EIA-Ⅰ	-14.4	13	52.0347	93.4771	862.864	392.8	119	Oleszczak L, Pokutta D, Chugunov K, Götherström A (2023) The food culture of the Iron Age nomadic elite from the ‘Valley of the Kings’ in Tuva: radiocarbon dating, stable carbon and nitrogen analysis of the Chinge Tey barrows (Turan-Uyuk Basin, Russia). Journal of Archaeological Science: Reports 51:104186. https://doi.org/10.1016/j.jasrep.2023.104186
48	Chinge Tey I	EIA-Ⅰ	-16.2	11.4	52.0347	93.4771	862.864	392.8	119	Oleszczak L, Pokutta D, Chugunov K, Götherström A (2023) The food culture of the Iron Age nomadic elite from the ‘Valley of the Kings’ in Tuva: radiocarbon dating, stable carbon and nitrogen analysis of the Chinge Tey barrows (Turan-Uyuk Basin, Russia). Journal of Archaeological Science: Reports 51:104186. https://doi.org/10.1016/j.jasrep.2023.104186
49	Chinge Tey I	EIA-Ⅰ	-14.7	13.5	52.0347	93.4771	862.864	392.8	119	Oleszczak L, Pokutta D, Chugunov K, Götherström A (2023) The food culture of the Iron Age nomadic elite from the ‘Valley of the Kings’ in Tuva: radiocarbon dating, stable carbon and nitrogen analysis of the Chinge Tey barrows (Turan-Uyuk Basin, Russia). Journal of Archaeological Science: Reports 51:104186. https://doi.org/10.1016/j.jasrep.2023.104186
50	Chinge Tey I	EIA-Ⅰ	-16.8	13.6	52.0347	93.4771	862.864	392.8	119	Oleszczak L, Pokutta D, Chugunov K, Götherström A (2023) The food culture of the Iron Age nomadic elite from the ‘Valley of the Kings’ in Tuva: radiocarbon dating, stable carbon and nitrogen analysis of the Chinge Tey barrows (Turan-Uyuk Basin, Russia). Journal of Archaeological Science: Reports 51:104186. https://doi.org/10.1016/j.jasrep.2023.104186
51	Chinge Tey I	EIA-Ⅰ	-14.6	12.8	52.0347	93.4771	862.864	392.8	119	Oleszczak L, Pokutta D, Chugunov K, Götherström A (2023) The food culture of the Iron Age nomadic elite from the ‘Valley of the Kings’ in Tuva: radiocarbon dating, stable carbon and nitrogen analysis of the Chinge Tey barrows (Turan-Uyuk Basin, Russia). Journal of Archaeological Science: Reports 51:104186. https://doi.org/10.1016/j.jasrep.2023.104186
52	Chinge Tey I	EIA-Ⅰ	-17.2	11.8	52.0347	93.4771	862.864	392.8	119	Oleszczak L, Pokutta D, Chugunov K, Götherström A (2023) The food culture of the Iron Age nomadic elite from the ‘Valley of the Kings’ in Tuva: radiocarbon dating, stable carbon and nitrogen analysis of the Chinge Tey barrows (Turan-Uyuk Basin, Russia). Journal of Archaeological Science: Reports 51:104186. https://doi.org/10.1016/j.jasrep.2023.104186
53	Chinge Tey I	EIA-Ⅰ	-14.7	12.9	52.0347	93.4771	862.864	392.8	119	Oleszczak L, Pokutta D, Chugunov K, Götherström A (2023) The food culture of the Iron Age nomadic elite from the ‘Valley of the Kings’ in Tuva: radiocarbon dating, stable carbon and nitrogen analysis of the Chinge Tey barrows (Turan-Uyuk Basin, Russia). Journal of Archaeological Science: Reports 51:104186. https://doi.org/10.1016/j.jasrep.2023.104186
54	Chinge Tey I	EIA-Ⅰ	-18.9	12.8	52.0347	93.4771	862.864	392.8	119	Oleszczak L, Pokutta D, Chugunov K, Götherström A (2023) The food culture of the Iron Age nomadic elite from the ‘Valley of the Kings’ in Tuva: radiocarbon dating, stable carbon and nitrogen analysis of the Chinge Tey barrows (Turan-Uyuk Basin, Russia). Journal of Archaeological Science: Reports 51:104186. https://doi.org/10.1016/j.jasrep.2023.104186
55	Chinge Tey I	EIA-Ⅰ	-16.1	13.2	52.0347	93.4771	862.864	392.8	119	Oleszczak L, Pokutta D, Chugunov K, Götherström A (2023) The food culture of the Iron Age nomadic elite from the ‘Valley of the Kings’ in Tuva: radiocarbon dating, stable carbon and nitrogen analysis of the Chinge Tey barrows (Turan-Uyuk Basin, Russia). Journal of Archaeological Science: Reports 51:104186. https://doi.org/10.1016/j.jasrep.2023.104186
56	Chinge Tey I	EIA-Ⅰ	-18.4	12.5	52.0347	93.4771	862.864	392.8	119	Oleszczak L, Pokutta D, Chugunov K, Götherström A (2023) The food culture of the Iron Age nomadic elite from the ‘Valley of the Kings’ in Tuva: radiocarbon dating, stable carbon and nitrogen analysis of the Chinge Tey barrows (Turan-Uyuk Basin, Russia). Journal of Archaeological Science: Reports 51:104186. https://doi.org/10.1016/j.jasrep.2023.104186
57	Chinge Tey I	EIA-Ⅰ	-16.7	13	52.0347	93.4771	862.864	392.8	119	Oleszczak L, Pokutta D, Chugunov K, Götherström A (2023) The food culture of the Iron Age nomadic elite from the ‘Valley of the Kings’ in Tuva: radiocarbon dating, stable carbon and nitrogen analysis of the Chinge Tey barrows (Turan-Uyuk Basin, Russia). Journal of Archaeological Science: Reports 51:104186. https://doi.org/10.1016/j.jasrep.2023.104186
58	Chinge Tey I	EIA-Ⅰ	-17	10.7	52.0347	93.4771	862.864	392.8	119	Oleszczak L, Pokutta D, Chugunov K, Götherström A (2023) The food culture of the Iron Age nomadic elite from the ‘Valley of the Kings’ in Tuva: radiocarbon dating, stable carbon and nitrogen analysis of the Chinge Tey barrows (Turan-Uyuk Basin, Russia). Journal of Archaeological Science: Reports 51:104186. https://doi.org/10.1016/j.jasrep.2023.104186
59	Chinge Tey I	EIA-Ⅰ	-16.2	12.3	52.0347	93.4771	862.864	392.8	119	Oleszczak L, Pokutta D, Chugunov K, Götherström A (2023) The food culture of the Iron Age nomadic elite from the ‘Valley of the Kings’ in Tuva: radiocarbon dating, stable carbon and nitrogen analysis of the Chinge Tey barrows (Turan-Uyuk Basin, Russia). Journal of Archaeological Science: Reports 51:104186. https://doi.org/10.1016/j.jasrep.2023.104186
60	Chinge Tey I	EIA-Ⅰ	-13.9	10.1	52.0347	93.4771	862.864	392.8	119	Oleszczak L, Pokutta D, Chugunov K, Götherström A (2023) The food culture of the Iron Age nomadic elite from the ‘Valley of the Kings’ in Tuva: radiocarbon dating, stable carbon and nitrogen analysis of the Chinge Tey barrows (Turan-Uyuk Basin, Russia). Journal of Archaeological Science: Reports 51:104186. https://doi.org/10.1016/j.jasrep.2023.104186
61	Wulasitai	EIA-Ⅰ	-18.3983	11.949	42.8478	86.4217	2006.9	279.8	114	This study
62	Wulasitai	EIA-Ⅰ	-18.3993	12.0037	42.8478	86.4217	2006.9	279.8	114	This study
63	Wulasitai	EIA-Ⅰ	-18.2845	12.2389	42.8478	86.4217	2006.9	279.8	114	This study
64	Ailiekexia'er	EIA-Ⅰ	-17.3	14.5	42.7386	92.5867	266.426	1	217	Dong W (2021) Diet of prehistoric residents of the Hami Basin. Fudan University Press, Shanghai
65	Dongheigou	EIA-Ⅰ	-17.83	13.07	43.5202	93.2291	2370.82	331	84	Xue L, Xi C, Jian-xin W, et al (2013) Carbon and nitrogen isotopic analysis of human bones excavated from the Dongheigou site, Ba Li-kun County, Xinjiang Autonomous Region. Acta Anthropologica Sinica 32:219
66	Duogang	EIA-Ⅰ	-13.78	12.01	41.8819	82.0564	1368.76	115.8	190	Zhang X, Qiu S, Zhang J, Guo W (2014) Xinjiang Duogang mudi chutuo ren gu de tan-dan wending tongweisu fenxi (新疆多岗墓地出土人骨的碳氮稳定同位素分析 / Stable Carbon and Nitrogen Isotope Analysis of Human Bones from the Duogang Cemetery, Xinjiang). Nanfang wenwu (南方文物 / Cultural Relics of Southern China) 79–91
67	Duogang	EIA-Ⅰ	-13.85	11.85	41.8819	82.0564	1368.76	115.8	190	Zhang X, Qiu S, Zhang J, Guo W (2014) Xinjiang Duogang mudi chutuo ren gu de tan-dan wending tongweisu fenxi (新疆多岗墓地出土人骨的碳氮稳定同位素分析 / Stable Carbon and Nitrogen Isotope Analysis of Human Bones from the Duogang Cemetery, Xinjiang). Nanfang wenwu (南方文物 / Cultural Relics of Southern China) 79–91
68	Duogang	EIA-Ⅰ	-13.8	12.43	41.8819	82.0564	1368.76	115.8	190	Zhang X, Qiu S, Zhang J, Guo W (2014) Xinjiang Duogang mudi chutuo ren gu de tan-dan wending tongweisu fenxi (新疆多岗墓地出土人骨的碳氮稳定同位素分析 / Stable Carbon and Nitrogen Isotope Analysis of Human Bones from the Duogang Cemetery, Xinjiang). Nanfang wenwu (南方文物 / Cultural Relics of Southern China) 79–91
69	Duogang	EIA-Ⅰ	-14.03	13.13	41.8819	82.0564	1368.76	115.8	190	Zhang X, Qiu S, Zhang J, Guo W (2014) Xinjiang Duogang mudi chutuo ren gu de tan-dan wending tongweisu fenxi (新疆多岗墓地出土人骨的碳氮稳定同位素分析 / Stable Carbon and Nitrogen Isotope Analysis of Human Bones from the Duogang Cemetery, Xinjiang). Nanfang wenwu (南方文物 / Cultural Relics of Southern China) 79–91
70	Duogang	EIA-Ⅰ	-13.75	13.13	41.8819	82.0564	1368.76	115.8	190	Zhang X, Qiu S, Zhang J, Guo W (2014) Xinjiang Duogang mudi chutuo ren gu de tan-dan wending tongweisu fenxi (新疆多岗墓地出土人骨的碳氮稳定同位素分析 / Stable Carbon and Nitrogen Isotope Analysis of Human Bones from the Duogang Cemetery, Xinjiang). Nanfang wenwu (南方文物 / Cultural Relics of Southern China) 79–91
71	Duogang	EIA-Ⅰ	-19.3	11.61	41.8819	82.0564	1368.76	115.8	190	Zhang X, Qiu S, Zhang J, Guo W (2014) Xinjiang Duogang mudi chutuo ren gu de tan-dan wending tongweisu fenxi (新疆多岗墓地出土人骨的碳氮稳定同位素分析 / Stable Carbon and Nitrogen Isotope Analysis of Human Bones from the Duogang Cemetery, Xinjiang). Nanfang wenwu (南方文物 / Cultural Relics of Southern China) 79–91
72	Duogang	EIA-Ⅰ	-15.04	12.15	41.8819	82.0564	1368.76	115.8	190	Zhang X, Qiu S, Zhang J, Guo W (2014) Xinjiang Duogang mudi chutuo ren gu de tan-dan wending tongweisu fenxi (新疆多岗墓地出土人骨的碳氮稳定同位素分析 / Stable Carbon and Nitrogen Isotope Analysis of Human Bones from the Duogang Cemetery, Xinjiang). Nanfang wenwu (南方文物 / Cultural Relics of Southern China) 79–91
73	Duogang	EIA-Ⅰ	-15.68	11.86	41.8819	82.0564	1368.76	115.8	190	Zhang X, Qiu S, Zhang J, Guo W (2014) Xinjiang Duogang mudi chutuo ren gu de tan-dan wending tongweisu fenxi (新疆多岗墓地出土人骨的碳氮稳定同位素分析 / Stable Carbon and Nitrogen Isotope Analysis of Human Bones from the Duogang Cemetery, Xinjiang). Nanfang wenwu (南方文物 / Cultural Relics of Southern China) 79–91
74	Duogang	EIA-Ⅰ	-14.94	12.11	41.8819	82.0564	1368.76	115.8	190	Zhang X, Qiu S, Zhang J, Guo W (2014) Xinjiang Duogang mudi chutuo ren gu de tan-dan wending tongweisu fenxi (新疆多岗墓地出土人骨的碳氮稳定同位素分析 / Stable Carbon and Nitrogen Isotope Analysis of Human Bones from the Duogang Cemetery, Xinjiang). Nanfang wenwu (南方文物 / Cultural Relics of Southern China) 79–91
75	Duogang	EIA-Ⅰ	-15.1	12.37	41.8819	82.0564	1368.76	115.8	190	Zhang X, Qiu S, Zhang J, Guo W (2014) Xinjiang Duogang mudi chutuo ren gu de tan-dan wending tongweisu fenxi (新疆多岗墓地出土人骨的碳氮稳定同位素分析 / Stable Carbon and Nitrogen Isotope Analysis of Human Bones from the Duogang Cemetery, Xinjiang). Nanfang wenwu (南方文物 / Cultural Relics of Southern China) 79–91
76	Duogang	EIA-Ⅰ	-13.5	12.78	41.8819	82.0564	1368.76	115.8	190	Zhang X, Qiu S, Zhang J, Guo W (2014) Xinjiang Duogang mudi chutuo ren gu de tan-dan wending tongweisu fenxi (新疆多岗墓地出土人骨的碳氮稳定同位素分析 / Stable Carbon and Nitrogen Isotope Analysis of Human Bones from the Duogang Cemetery, Xinjiang). Nanfang wenwu (南方文物 / Cultural Relics of Southern China) 79–91
77	Duogang	EIA-Ⅰ	-14.39	12.18	41.8819	82.0564	1368.76	115.8	190	Zhang X, Qiu S, Zhang J, Guo W (2014) Xinjiang Duogang mudi chutuo ren gu de tan-dan wending tongweisu fenxi (新疆多岗墓地出土人骨的碳氮稳定同位素分析 / Stable Carbon and Nitrogen Isotope Analysis of Human Bones from the Duogang Cemetery, Xinjiang). Nanfang wenwu (南方文物 / Cultural Relics of Southern China) 79–91
78	Duogang	EIA-Ⅰ	-12.86	12.55	41.8819	82.0564	1368.76	115.8	190	Zhang X, Qiu S, Zhang J, Guo W (2014) Xinjiang Duogang mudi chutuo ren gu de tan-dan wending tongweisu fenxi (新疆多岗墓地出土人骨的碳氮稳定同位素分析 / Stable Carbon and Nitrogen Isotope Analysis of Human Bones from the Duogang Cemetery, Xinjiang). Nanfang wenwu (南方文物 / Cultural Relics of Southern China) 79–91
79	Duogang	EIA-Ⅰ	-14.52	12.85	41.8819	82.0564	1368.76	115.8	190	Zhang X, Qiu S, Zhang J, Guo W (2014) Xinjiang Duogang mudi chutuo ren gu de tan-dan wending tongweisu fenxi (新疆多岗墓地出土人骨的碳氮稳定同位素分析 / Stable Carbon and Nitrogen Isotope Analysis of Human Bones from the Duogang Cemetery, Xinjiang). Nanfang wenwu (南方文物 / Cultural Relics of Southern China) 79–91
80	Duogang	EIA-Ⅰ	-14.33	12	41.8819	82.0564	1368.76	115.8	190	Zhang X, Qiu S, Zhang J, Guo W (2014) Xinjiang Duogang mudi chutuo ren gu de tan-dan wending tongweisu fenxi (新疆多岗墓地出土人骨的碳氮稳定同位素分析 / Stable Carbon and Nitrogen Isotope Analysis of Human Bones from the Duogang Cemetery, Xinjiang). Nanfang wenwu (南方文物 / Cultural Relics of Southern China) 79–91
81	Duogang	EIA-Ⅰ	-13.5	13.13	41.8819	82.0564	1368.76	115.8	190	Zhang X, Qiu S, Zhang J, Guo W (2014) Xinjiang Duogang mudi chutuo ren gu de tan-dan wending tongweisu fenxi (新疆多岗墓地出土人骨的碳氮稳定同位素分析 / Stable Carbon and Nitrogen Isotope Analysis of Human Bones from the Duogang Cemetery, Xinjiang). Nanfang wenwu (南方文物 / Cultural Relics of Southern China) 79–91
82	Duogang	EIA-Ⅰ	-13.64	13.15	41.8819	82.0564	1368.76	115.8	190	Zhang X, Qiu S, Zhang J, Guo W (2014) Xinjiang Duogang mudi chutuo ren gu de tan-dan wending tongweisu fenxi (新疆多岗墓地出土人骨的碳氮稳定同位素分析 / Stable Carbon and Nitrogen Isotope Analysis of Human Bones from the Duogang Cemetery, Xinjiang). Nanfang wenwu (南方文物 / Cultural Relics of Southern China) 79–91
83	Duogang	EIA-Ⅰ	-14.01	12.35	41.8819	82.0564	1368.76	115.8	190	Zhang X, Qiu S, Zhang J, Guo W (2014) Xinjiang Duogang mudi chutuo ren gu de tan-dan wending tongweisu fenxi (新疆多岗墓地出土人骨的碳氮稳定同位素分析 / Stable Carbon and Nitrogen Isotope Analysis of Human Bones from the Duogang Cemetery, Xinjiang). Nanfang wenwu (南方文物 / Cultural Relics of Southern China) 79–91
84	Duogang	EIA-Ⅰ	-15.08	12.08	41.8819	82.0564	1368.76	115.8	190	Zhang X, Qiu S, Zhang J, Guo W (2014) Xinjiang Duogang mudi chutuo ren gu de tan-dan wending tongweisu fenxi (新疆多岗墓地出土人骨的碳氮稳定同位素分析 / Stable Carbon and Nitrogen Isotope Analysis of Human Bones from the Duogang Cemetery, Xinjiang). Nanfang wenwu (南方文物 / Cultural Relics of Southern China) 79–91
85	Duogang	EIA-Ⅰ	-17.14	12.38	41.8819	82.0564	1368.76	115.8	190	Zhang X, Qiu S, Zhang J, Guo W (2014) Xinjiang Duogang mudi chutuo ren gu de tan-dan wending tongweisu fenxi (新疆多岗墓地出土人骨的碳氮稳定同位素分析 / Stable Carbon and Nitrogen Isotope Analysis of Human Bones from the Duogang Cemetery, Xinjiang). Nanfang wenwu (南方文物 / Cultural Relics of Southern China) 79–91
86	Duogang	EIA-Ⅰ	-19.09	12.03	41.8819	82.0564	1368.76	115.8	190	Zhang X, Qiu S, Zhang J, Guo W (2014) Xinjiang Duogang mudi chutuo ren gu de tan-dan wending tongweisu fenxi (新疆多岗墓地出土人骨的碳氮稳定同位素分析 / Stable Carbon and Nitrogen Isotope Analysis of Human Bones from the Duogang Cemetery, Xinjiang). Nanfang wenwu (南方文物 / Cultural Relics of Southern China) 79–91
87	Duogang	EIA-Ⅰ	-16.16	12.21	41.8819	82.0564	1368.76	115.8	190	Zhang X, Qiu S, Zhang J, Guo W (2014) Xinjiang Duogang mudi chutuo ren gu de tan-dan wending tongweisu fenxi (新疆多岗墓地出土人骨的碳氮稳定同位素分析 / Stable Carbon and Nitrogen Isotope Analysis of Human Bones from the Duogang Cemetery, Xinjiang). Nanfang wenwu (南方文物 / Cultural Relics of Southern China) 79–91
88	Duogang	EIA-Ⅰ	-13.66	12.51	41.8819	82.0564	1368.76	115.8	190	Zhang X, Qiu S, Zhang J, Guo W (2014) Xinjiang Duogang mudi chutuo ren gu de tan-dan wending tongweisu fenxi (新疆多岗墓地出土人骨的碳氮稳定同位素分析 / Stable Carbon and Nitrogen Isotope Analysis of Human Bones from the Duogang Cemetery, Xinjiang). Nanfang wenwu (南方文物 / Cultural Relics of Southern China) 79–91
89	Duogang	EIA-Ⅰ	-14.05	12.4	41.8819	82.0564	1368.76	115.8	190	Zhang X, Qiu S, Zhang J, Guo W (2014) Xinjiang Duogang mudi chutuo ren gu de tan-dan wending tongweisu fenxi (新疆多岗墓地出土人骨的碳氮稳定同位素分析 / Stable Carbon and Nitrogen Isotope Analysis of Human Bones from the Duogang Cemetery, Xinjiang). Nanfang wenwu (南方文物 / Cultural Relics of Southern China) 79–91
90	Duogang	EIA-Ⅰ	-13.53	12.94	41.8819	82.0564	1368.76	115.8	190	Zhang X, Qiu S, Zhang J, Guo W (2014) Xinjiang Duogang mudi chutuo ren gu de tan-dan wending tongweisu fenxi (新疆多岗墓地出土人骨的碳氮稳定同位素分析 / Stable Carbon and Nitrogen Isotope Analysis of Human Bones from the Duogang Cemetery, Xinjiang). Nanfang wenwu (南方文物 / Cultural Relics of Southern China) 79–91
91	Duogang	EIA-Ⅰ	-14.24	13.74	41.8819	82.0564	1368.76	115.8	190	Zhang X, Qiu S, Zhang J, Guo W (2014) Xinjiang Duogang mudi chutuo ren gu de tan-dan wending tongweisu fenxi (新疆多岗墓地出土人骨的碳氮稳定同位素分析 / Stable Carbon and Nitrogen Isotope Analysis of Human Bones from the Duogang Cemetery, Xinjiang). Nanfang wenwu (南方文物 / Cultural Relics of Southern China) 79–91
92	Duogang	EIA-Ⅰ	-15.42	12.79	41.8819	82.0564	1368.76	115.8	190	Zhang X, Qiu S, Zhang J, Guo W (2014) Xinjiang Duogang mudi chutuo ren gu de tan-dan wending tongweisu fenxi (新疆多岗墓地出土人骨的碳氮稳定同位素分析 / Stable Carbon and Nitrogen Isotope Analysis of Human Bones from the Duogang Cemetery, Xinjiang). Nanfang wenwu (南方文物 / Cultural Relics of Southern China) 79–91
93	Duogang	EIA-Ⅰ	-15.27	12.85	41.8819	82.0564	1368.76	115.8	190	Zhang X, Qiu S, Zhang J, Guo W (2014) Xinjiang Duogang mudi chutuo ren gu de tan-dan wending tongweisu fenxi (新疆多岗墓地出土人骨的碳氮稳定同位素分析 / Stable Carbon and Nitrogen Isotope Analysis of Human Bones from the Duogang Cemetery, Xinjiang). Nanfang wenwu (南方文物 / Cultural Relics of Southern China) 79–91
94	Duogang	EIA-Ⅰ	-15.81	13.62	41.8819	82.0564	1368.76	115.8	190	Zhang X, Qiu S, Zhang J, Guo W (2014) Xinjiang Duogang mudi chutuo ren gu de tan-dan wending tongweisu fenxi (新疆多岗墓地出土人骨的碳氮稳定同位素分析 / Stable Carbon and Nitrogen Isotope Analysis of Human Bones from the Duogang Cemetery, Xinjiang). Nanfang wenwu (南方文物 / Cultural Relics of Southern China) 79–91
95	Duogang	EIA-Ⅰ	-14.04	13.34	41.8819	82.0564	1368.76	115.8	190	Zhang X, Qiu S, Zhang J, Guo W (2014) Xinjiang Duogang mudi chutuo ren gu de tan-dan wending tongweisu fenxi (新疆多岗墓地出土人骨的碳氮稳定同位素分析 / Stable Carbon and Nitrogen Isotope Analysis of Human Bones from the Duogang Cemetery, Xinjiang). Nanfang wenwu (南方文物 / Cultural Relics of Southern China) 79–91
96	Duogang	EIA-Ⅰ	-16.44	12.96	41.8819	82.0564	1368.76	115.8	190	Zhang X, Qiu S, Zhang J, Guo W (2014) Xinjiang Duogang mudi chutuo ren gu de tan-dan wending tongweisu fenxi (新疆多岗墓地出土人骨的碳氮稳定同位素分析 / Stable Carbon and Nitrogen Isotope Analysis of Human Bones from the Duogang Cemetery, Xinjiang). Nanfang wenwu (南方文物 / Cultural Relics of Southern China) 79–91
97	Duogang	EIA-Ⅰ	-15.92	14	41.8819	82.0564	1368.76	115.8	190	Zhang X, Qiu S, Zhang J, Guo W (2014) Xinjiang Duogang mudi chutuo ren gu de tan-dan wending tongweisu fenxi (新疆多岗墓地出土人骨的碳氮稳定同位素分析 / Stable Carbon and Nitrogen Isotope Analysis of Human Bones from the Duogang Cemetery, Xinjiang). Nanfang wenwu (南方文物 / Cultural Relics of Southern China) 79–91
98	Duogang	EIA-Ⅰ	-15.39	12.88	41.8819	82.0564	1368.76	115.8	190	Zhang X, Qiu S, Zhang J, Guo W (2014) Xinjiang Duogang mudi chutuo ren gu de tan-dan wending tongweisu fenxi (新疆多岗墓地出土人骨的碳氮稳定同位素分析 / Stable Carbon and Nitrogen Isotope Analysis of Human Bones from the Duogang Cemetery, Xinjiang). Nanfang wenwu (南方文物 / Cultural Relics of Southern China) 79–91
99	Jierzankale	EIA-Ⅰ	-18.3	13.1	37.8706	75.2261	3048.23	110.9	70	Guo Y, Lou J, Xie S, et al (2020) Isotopic reconstruction of human diet in the Ji’erzankale site, Xinjiang Uyghur Autonomous Region, China. International Journal of Osteoarchaeology 30:65–72. https://doi.org/10.1002/oa.2831
100	Jierzankale	EIA-Ⅰ	-17.7	13.3	37.8706	75.2261	3048.23	110.9	70	Guo Y, Lou J, Xie S, et al (2020) Isotopic reconstruction of human diet in the Ji’erzankale site, Xinjiang Uyghur Autonomous Region, China. International Journal of Osteoarchaeology 30:65–72. https://doi.org/10.1002/oa.2831
101	Jierzankale	EIA-Ⅰ	-17.9	12.9	37.8706	75.2261	3048.23	110.9	70	Guo Y, Lou J, Xie S, et al (2020) Isotopic reconstruction of human diet in the Ji’erzankale site, Xinjiang Uyghur Autonomous Region, China. International Journal of Osteoarchaeology 30:65–72. https://doi.org/10.1002/oa.2831
102	Jierzankale	EIA-Ⅰ	-17.6	13.1	37.8706	75.2261	3048.23	110.9	70	Guo Y, Lou J, Xie S, et al (2020) Isotopic reconstruction of human diet in the Ji’erzankale site, Xinjiang Uyghur Autonomous Region, China. International Journal of Osteoarchaeology 30:65–72. https://doi.org/10.1002/oa.2831
103	Jierzankale	EIA-Ⅰ	-17.9	13.3	37.8706	75.2261	3048.23	110.9	70	Guo Y, Lou J, Xie S, et al (2020) Isotopic reconstruction of human diet in the Ji’erzankale site, Xinjiang Uyghur Autonomous Region, China. International Journal of Osteoarchaeology 30:65–72. https://doi.org/10.1002/oa.2831
104	Jierzankale	EIA-Ⅰ	-17.9	13	37.8706	75.2261	3048.23	110.9	70	Guo Y, Lou J, Xie S, et al (2020) Isotopic reconstruction of human diet in the Ji’erzankale site, Xinjiang Uyghur Autonomous Region, China. International Journal of Osteoarchaeology 30:65–72. https://doi.org/10.1002/oa.2831
105	Jierzankale	EIA-Ⅰ	-17.9	13.1	37.8706	75.2261	3048.23	110.9	70	Guo Y, Lou J, Xie S, et al (2020) Isotopic reconstruction of human diet in the Ji’erzankale site, Xinjiang Uyghur Autonomous Region, China. International Journal of Osteoarchaeology 30:65–72. https://doi.org/10.1002/oa.2831
106	Jierzankale	EIA-Ⅰ	-18	12.8	37.8706	75.2261	3048.23	110.9	70	Guo Y, Lou J, Xie S, et al (2020) Isotopic reconstruction of human diet in the Ji’erzankale site, Xinjiang Uyghur Autonomous Region, China. International Journal of Osteoarchaeology 30:65–72. https://doi.org/10.1002/oa.2831
107	Jierzankale	EIA-Ⅰ	-18	13.1	37.8706	75.2261	3048.23	110.9	70	Guo Y, Lou J, Xie S, et al (2020) Isotopic reconstruction of human diet in the Ji’erzankale site, Xinjiang Uyghur Autonomous Region, China. International Journal of Osteoarchaeology 30:65–72. https://doi.org/10.1002/oa.2831
108	Jierzankale	EIA-Ⅰ	-17.9	13.4	37.8706	75.2261	3048.23	110.9	70	Guo Y, Lou J, Xie S, et al (2020) Isotopic reconstruction of human diet in the Ji’erzankale site, Xinjiang Uyghur Autonomous Region, China. International Journal of Osteoarchaeology 30:65–72. https://doi.org/10.1002/oa.2831
109	Jierzankale	EIA-Ⅰ	-17.9	13.5	37.8706	75.2261	3048.23	110.9	70	Guo Y, Lou J, Xie S, et al (2020) Isotopic reconstruction of human diet in the Ji’erzankale site, Xinjiang Uyghur Autonomous Region, China. International Journal of Osteoarchaeology 30:65–72. https://doi.org/10.1002/oa.2831
110	Jierzankale	EIA-Ⅰ	-18	13.7	37.8706	75.2261	3048.23	110.9	70	Guo Y, Lou J, Xie S, et al (2020) Isotopic reconstruction of human diet in the Ji’erzankale site, Xinjiang Uyghur Autonomous Region, China. International Journal of Osteoarchaeology 30:65–72. https://doi.org/10.1002/oa.2831
111	Jierzankale	EIA-Ⅰ	-17.9	14.1	37.8706	75.2261	3048.23	110.9	70	Guo Y, Lou J, Xie S, et al (2020) Isotopic reconstruction of human diet in the Ji’erzankale site, Xinjiang Uyghur Autonomous Region, China. International Journal of Osteoarchaeology 30:65–72. https://doi.org/10.1002/oa.2831
112	Jierzankale	EIA-Ⅰ	-17.9	12.7	37.8706	75.2261	3048.23	110.9	70	Guo Y, Lou J, Xie S, et al (2020) Isotopic reconstruction of human diet in the Ji’erzankale site, Xinjiang Uyghur Autonomous Region, China. International Journal of Osteoarchaeology 30:65–72. https://doi.org/10.1002/oa.2831
113	Jierzankale	EIA-Ⅰ	-18.1	12.2	37.8706	75.2261	3048.23	110.9	70	Guo Y, Lou J, Xie S, et al (2020) Isotopic reconstruction of human diet in the Ji’erzankale site, Xinjiang Uyghur Autonomous Region, China. International Journal of Osteoarchaeology 30:65–72. https://doi.org/10.1002/oa.2831
114	Jierzankale	EIA-Ⅰ	-17.9	13.2	37.8706	75.2261	3048.23	110.9	70	Guo Y, Lou J, Xie S, et al (2020) Isotopic reconstruction of human diet in the Ji’erzankale site, Xinjiang Uyghur Autonomous Region, China. International Journal of Osteoarchaeology 30:65–72. https://doi.org/10.1002/oa.2831
115	Jierzankale	EIA-Ⅰ	-17.7	15.1	37.8706	75.2261	3048.23	110.9	70	Guo Y, Lou J, Xie S, et al (2020) Isotopic reconstruction of human diet in the Ji’erzankale site, Xinjiang Uyghur Autonomous Region, China. International Journal of Osteoarchaeology 30:65–72. https://doi.org/10.1002/oa.2831
116	Jierzankale	EIA-Ⅰ	-18.1	13.6	37.8706	75.2261	3048.23	110.9	70	Guo Y, Lou J, Xie S, et al (2020) Isotopic reconstruction of human diet in the Ji’erzankale site, Xinjiang Uyghur Autonomous Region, China. International Journal of Osteoarchaeology 30:65–72. https://doi.org/10.1002/oa.2831
117	Jierzankale	EIA-Ⅰ	-17.7	13.6	37.8706	75.2261	3048.23	110.9	70	Guo Y, Lou J, Xie S, et al (2020) Isotopic reconstruction of human diet in the Ji’erzankale site, Xinjiang Uyghur Autonomous Region, China. International Journal of Osteoarchaeology 30:65–72. https://doi.org/10.1002/oa.2831
118	Jierzankale	EIA-Ⅰ	-18	13.2	37.8706	75.2261	3048.23	110.9	70	Guo Y, Lou J, Xie S, et al (2020) Isotopic reconstruction of human diet in the Ji’erzankale site, Xinjiang Uyghur Autonomous Region, China. International Journal of Osteoarchaeology 30:65–72. https://doi.org/10.1002/oa.2831
119	Jierzankale	EIA-Ⅰ	-18	12.8	37.8706	75.2261	3048.23	110.9	70	Guo Y, Lou J, Xie S, et al (2020) Isotopic reconstruction of human diet in the Ji’erzankale site, Xinjiang Uyghur Autonomous Region, China. International Journal of Osteoarchaeology 30:65–72. https://doi.org/10.1002/oa.2831
120	Jierzankale	EIA-Ⅰ	-17.7	13.2	37.8706	75.2261	3048.23	110.9	70	Guo Y, Lou J, Xie S, et al (2020) Isotopic reconstruction of human diet in the Ji’erzankale site, Xinjiang Uyghur Autonomous Region, China. International Journal of Osteoarchaeology 30:65–72. https://doi.org/10.1002/oa.2831
121	Jierzankale	EIA-Ⅰ	-18.3	12.9	37.8706	75.2261	3048.23	110.9	70	Guo Y, Lou J, Xie S, et al (2020) Isotopic reconstruction of human diet in the Ji’erzankale site, Xinjiang Uyghur Autonomous Region, China. International Journal of Osteoarchaeology 30:65–72. https://doi.org/10.1002/oa.2831
122	Jierzankale	EIA-Ⅰ	-17.7	13	37.8706	75.2261	3048.23	110.9	70	Guo Y, Lou J, Xie S, et al (2020) Isotopic reconstruction of human diet in the Ji’erzankale site, Xinjiang Uyghur Autonomous Region, China. International Journal of Osteoarchaeology 30:65–72. https://doi.org/10.1002/oa.2831
123	Jiayi	EIA-Ⅰ	-15.69	12.37	42.8904	89.1755	-55.2518	2.4	231	Dai Q, Wang A, Wang L, et al (2025) Diet of ancient Turban population from northwestern China illustrated by isotopic analysis of human teeth and bones. npj Herit Sci 13:142. https://doi.org/10.1038/s40494-025-01696-w
124	Jiayi	EIA-Ⅰ	-16.1882	13.3588	42.8904	89.1755	-55.2518	2.4	231	Dai Q, Wang A, Wang L, et al (2025) Diet of ancient Turban population from northwestern China illustrated by isotopic analysis of human teeth and bones. npj Herit Sci 13:142. https://doi.org/10.1038/s40494-025-01696-w
125	Jiayi	EIA-Ⅰ	-15.8	12.2	42.8904	89.1755	-55.2518	2.4	231	Dai Q, Wang A, Wang L, et al (2025) Diet of ancient Turban population from northwestern China illustrated by isotopic analysis of human teeth and bones. npj Herit Sci 13:142. https://doi.org/10.1038/s40494-025-01696-w
126	Jiayi	EIA-Ⅰ	-16.6	12.1	42.8904	89.1755	-55.2518	2.4	231	Dai Q, Wang A, Wang L, et al (2025) Diet of ancient Turban population from northwestern China illustrated by isotopic analysis of human teeth and bones. npj Herit Sci 13:142. https://doi.org/10.1038/s40494-025-01696-w
127	Jiayi	EIA-Ⅰ	-15.6	11.7	42.8904	89.1755	-55.2518	2.4	231	Dai Q, Wang A, Wang L, et al (2025) Diet of ancient Turban population from northwestern China illustrated by isotopic analysis of human teeth and bones. npj Herit Sci 13:142. https://doi.org/10.1038/s40494-025-01696-w
128	Jiayi	EIA-Ⅰ	-14.9	11.2	42.8904	89.1755	-55.2518	2.4	231	Dai Q, Wang A, Wang L, et al (2025) Diet of ancient Turban population from northwestern China illustrated by isotopic analysis of human teeth and bones. npj Herit Sci 13:142. https://doi.org/10.1038/s40494-025-01696-w
129	Jiayi	EIA-Ⅰ	-17.5	11.1	42.8904	89.1755	-55.2518	2.4	231	Dai Q, Wang A, Wang L, et al (2025) Diet of ancient Turban population from northwestern China illustrated by isotopic analysis of human teeth and bones. npj Herit Sci 13:142. https://doi.org/10.1038/s40494-025-01696-w
130	Jiayi	EIA-Ⅰ	-17.7	11.7	42.8904	89.1755	-55.2518	2.4	231	Dai Q, Wang A, Wang L, et al (2025) Diet of ancient Turban population from northwestern China illustrated by isotopic analysis of human teeth and bones. npj Herit Sci 13:142. https://doi.org/10.1038/s40494-025-01696-w
131	Jiayi	EIA-Ⅰ	-16.2	11.3	42.8904	89.1755	-55.2518	2.4	231	Dai Q, Wang A, Wang L, et al (2025) Diet of ancient Turban population from northwestern China illustrated by isotopic analysis of human teeth and bones. npj Herit Sci 13:142. https://doi.org/10.1038/s40494-025-01696-w
132	Jiayi	EIA-Ⅰ	-15.3	14	42.8904	89.1755	-55.2518	2.4	231	Dai Q, Wang A, Wang L, et al (2025) Diet of ancient Turban population from northwestern China illustrated by isotopic analysis of human teeth and bones. npj Herit Sci 13:142. https://doi.org/10.1038/s40494-025-01696-w
133	Jiayi	EIA-Ⅰ	-16.1	13	42.8904	89.1755	-55.2518	2.4	231	Dai Q, Wang A, Wang L, et al (2025) Diet of ancient Turban population from northwestern China illustrated by isotopic analysis of human teeth and bones. npj Herit Sci 13:142. https://doi.org/10.1038/s40494-025-01696-w
134	Jiayi	EIA-Ⅰ	-16.8	10.8	42.8904	89.1755	-55.2518	2.4	231	Dai Q, Wang A, Wang L, et al (2025) Diet of ancient Turban population from northwestern China illustrated by isotopic analysis of human teeth and bones. npj Herit Sci 13:142. https://doi.org/10.1038/s40494-025-01696-w
135	Jiayi	EIA-Ⅰ	-14.62	12.64	42.8904	89.1755	-55.2518	2.4	231	Dai Q, Wang A, Wang L, et al (2025) Diet of ancient Turban population from northwestern China illustrated by isotopic analysis of human teeth and bones. npj Herit Sci 13:142. https://doi.org/10.1038/s40494-025-01696-w
136	Jiayi	EIA-Ⅰ	-17.7	13.5	42.8904	89.1755	-55.2518	2.4	231	Dai Q, Wang A, Wang L, et al (2025) Diet of ancient Turban population from northwestern China illustrated by isotopic analysis of human teeth and bones. npj Herit Sci 13:142. https://doi.org/10.1038/s40494-025-01696-w
137	Jiayi	EIA-Ⅰ	-15.5	12.5	42.8904	89.1755	-55.2518	2.4	231	Dai Q, Wang A, Wang L, et al (2025) Diet of ancient Turban population from northwestern China illustrated by isotopic analysis of human teeth and bones. npj Herit Sci 13:142. https://doi.org/10.1038/s40494-025-01696-w
138	Jiayi	EIA-Ⅰ	-15.6	11	42.8904	89.1755	-55.2518	2.4	231	Dai Q, Wang A, Wang L, et al (2025) Diet of ancient Turban population from northwestern China illustrated by isotopic analysis of human teeth and bones. npj Herit Sci 13:142. https://doi.org/10.1038/s40494-025-01696-w
139	Jiayi	EIA-Ⅰ	-14.5	12	42.8904	89.1755	-55.2518	2.4	231	Dai Q, Wang A, Wang L, et al (2025) Diet of ancient Turban population from northwestern China illustrated by isotopic analysis of human teeth and bones. npj Herit Sci 13:142. https://doi.org/10.1038/s40494-025-01696-w
140	Mohuchahan	EIA-Ⅰ	-18.7	13	42.4835	85.7098	2244.66	408.8	102	Dong W, An C, Zhang T, Alipujiang N (2022a) Subsistence strategies of people from Chawuhu Culture in the middle of Tianshan Mountains: A case study of Mohuchahan site from Hejing County, Xinjiang. Quaternary Sciences 42:80–91
141	Mohuchahan	EIA-Ⅰ	-18.6	12.5	42.4835	85.7098	2244.66	408.8	102	Dong W, An C, Zhang T, Alipujiang N (2022a) Subsistence strategies of people from Chawuhu Culture in the middle of Tianshan Mountains: A case study of Mohuchahan site from Hejing County, Xinjiang. Quaternary Sciences 42:80–91
142	Mohuchahan	EIA-Ⅰ	-18.9	12.8	42.4835	85.7098	2244.66	408.8	102	Dong W, An C, Zhang T, Alipujiang N (2022a) Subsistence strategies of people from Chawuhu Culture in the middle of Tianshan Mountains: A case study of Mohuchahan site from Hejing County, Xinjiang. Quaternary Sciences 42:80–91
143	Mohuchahan	EIA-Ⅰ	-16.6	12	42.4835	85.7098	2244.66	408.8	102	Dong W, An C, Zhang T, Alipujiang N (2022a) Subsistence strategies of people from Chawuhu Culture in the middle of Tianshan Mountains: A case study of Mohuchahan site from Hejing County, Xinjiang. Quaternary Sciences 42:80–91
144	Mohuchahan	EIA-Ⅰ	-17.9	11.6	42.4835	85.7098	2244.66	408.8	102	Dong W, An C, Zhang T, Alipujiang N (2022a) Subsistence strategies of people from Chawuhu Culture in the middle of Tianshan Mountains: A case study of Mohuchahan site from Hejing County, Xinjiang. Quaternary Sciences 42:80–91
145	Mohuchahan	EIA-Ⅰ	-18.5	12.4	42.4835	85.7098	2244.66	408.8	102	Dong W, An C, Zhang T, Alipujiang N (2022a) Subsistence strategies of people from Chawuhu Culture in the middle of Tianshan Mountains: A case study of Mohuchahan site from Hejing County, Xinjiang. Quaternary Sciences 42:80–91
146	Mohuchahan	EIA-Ⅰ	-18.4	13.4	42.4835	85.7098	2244.66	408.8	102	Dong W, An C, Zhang T, Alipujiang N (2022a) Subsistence strategies of people from Chawuhu Culture in the middle of Tianshan Mountains: A case study of Mohuchahan site from Hejing County, Xinjiang. Quaternary Sciences 42:80–91
147	Mohuchahan	EIA-Ⅰ	-18.3	13.4	42.4835	85.7098	2244.66	408.8	102	Dong W, An C, Zhang T, Alipujiang N (2022a) Subsistence strategies of people from Chawuhu Culture in the middle of Tianshan Mountains: A case study of Mohuchahan site from Hejing County, Xinjiang. Quaternary Sciences 42:80–91
148	Mohuchahan	EIA-Ⅰ	-18	12	42.4835	85.7098	2244.66	408.8	102	Dong W, An C, Zhang T, Alipujiang N (2022a) Subsistence strategies of people from Chawuhu Culture in the middle of Tianshan Mountains: A case study of Mohuchahan site from Hejing County, Xinjiang. Quaternary Sciences 42:80–91
149	Qiongkeke 1st cemetery	EIA-Ⅰ	-16.47	12.89	43.7507	82.6225	1138.71	159.1	168	Zhang Q, Li S (2006) Xinjiang Nileke xian Qiongkeke yihao mudi gudai jumin de shiwu jiegou fenxi (新疆尼勒克县穷科克一号墓地古代居民的食物结构分析 / Dietary Structure of Ancient Residents from the Qiongkeke No. 1 Cemetery in Nileke County, Xinjiang). Xiyu yanjiu (西域研究 / The Western Regions Studies) 78–81
150	Qiongkeke 1st cemetery	EIA-Ⅰ	-16.19	13.33	43.7507	82.6225	1138.71	159.1	168	Zhang Q, Li S (2006) Xinjiang Nileke xian Qiongkeke yihao mudi gudai jumin de shiwu jiegou fenxi (新疆尼勒克县穷科克一号墓地古代居民的食物结构分析 / Dietary Structure of Ancient Residents from the Qiongkeke No. 1 Cemetery in Nileke County, Xinjiang). Xiyu yanjiu (西域研究 / The Western Regions Studies) 78–81
151	Qiongkeke 1st cemetery	EIA-Ⅰ	-16.15	12.08	43.7507	82.6225	1138.71	159.1	168	Zhang Q, Li S (2006) Xinjiang Nileke xian Qiongkeke yihao mudi gudai jumin de shiwu jiegou fenxi (新疆尼勒克县穷科克一号墓地古代居民的食物结构分析 / Dietary Structure of Ancient Residents from the Qiongkeke No. 1 Cemetery in Nileke County, Xinjiang). Xiyu yanjiu (西域研究 / The Western Regions Studies) 78–81
152	Qiongkeke 1st cemetery	EIA-Ⅰ	-16.08	12.85	43.7507	82.6225	1138.71	159.1	168	Zhang Q, Li S (2006) Xinjiang Nileke xian Qiongkeke yihao mudi gudai jumin de shiwu jiegou fenxi (新疆尼勒克县穷科克一号墓地古代居民的食物结构分析 / Dietary Structure of Ancient Residents from the Qiongkeke No. 1 Cemetery in Nileke County, Xinjiang). Xiyu yanjiu (西域研究 / The Western Regions Studies) 78–81
153	Qiongkeke 1st cemetery	EIA-Ⅰ	-16.29	12.92	43.7507	82.6225	1138.71	159.1	168	Zhang Q, Li S (2006) Xinjiang Nileke xian Qiongkeke yihao mudi gudai jumin de shiwu jiegou fenxi (新疆尼勒克县穷科克一号墓地古代居民的食物结构分析 / Dietary Structure of Ancient Residents from the Qiongkeke No. 1 Cemetery in Nileke County, Xinjiang). Xiyu yanjiu (西域研究 / The Western Regions Studies) 78–81
154	Qiongkeke 1st cemetery	EIA-Ⅰ	-16.22	12.27	43.7507	82.6225	1138.71	159.1	168	Zhang Q, Li S (2006) Xinjiang Nileke xian Qiongkeke yihao mudi gudai jumin de shiwu jiegou fenxi (新疆尼勒克县穷科克一号墓地古代居民的食物结构分析 / Dietary Structure of Ancient Residents from the Qiongkeke No. 1 Cemetery in Nileke County, Xinjiang). Xiyu yanjiu (西域研究 / The Western Regions Studies) 78–81
155	Qiongkeke 1st cemetery	EIA-Ⅰ	-16.02	12.64	43.7507	82.6225	1138.71	159.1	168	Zhang Q, Li S (2006) Xinjiang Nileke xian Qiongkeke yihao mudi gudai jumin de shiwu jiegou fenxi (新疆尼勒克县穷科克一号墓地古代居民的食物结构分析 / Dietary Structure of Ancient Residents from the Qiongkeke No. 1 Cemetery in Nileke County, Xinjiang). Xiyu yanjiu (西域研究 / The Western Regions Studies) 78–81
156	Qiongkeke 1st cemetery	EIA-Ⅰ	-16.46	12.55	43.7507	82.6225	1138.71	159.1	168	Zhang Q, Li S (2006) Xinjiang Nileke xian Qiongkeke yihao mudi gudai jumin de shiwu jiegou fenxi (新疆尼勒克县穷科克一号墓地古代居民的食物结构分析 / Dietary Structure of Ancient Residents from the Qiongkeke No. 1 Cemetery in Nileke County, Xinjiang). Xiyu yanjiu (西域研究 / The Western Regions Studies) 78–81
157	Xiaxinguang	EIA-Ⅰ	-18.2504	12.2703	42.862	86.4424	2082.82	298.8	108	This study
158	Xiaxinguang	EIA-Ⅰ	-18.3639	12.2732	42.862	86.4424	2082.82	298.8	108	This study
159	Xiaxinguang	EIA-Ⅰ	-18.983	12.564	42.862	86.4424	2082.82	298.8	108	This study
160	Xiaxinguang	EIA-Ⅰ	-18.1288	14.6976	42.862	86.4424	2082.82	298.8	108	This study
161	Xiaxinguang	EIA-Ⅰ	-19.0713	12.7021	42.862	86.4424	2082.82	298.8	108	This study
162	Ya'er	EIA-Ⅰ	-15.8	13.9	42.86	90.8344	272.019	4.3	220	Dong W (2022) Diet of prehistoric residents of the Hami Basin. Fudan University Press, Shanghai
163	Ya'er	EIA-Ⅰ	-15	14.5	42.86	90.8344	272.019	4.3	220	Dong W (2023) Diet of prehistoric residents of the Hami Basin. Fudan University Press, Shanghai
164	Yanghai	EIA-Ⅰ	-16.8	11.9	42.8	89.65	-42.9101	5.2	229	Si Y, Lu E, Li X, et al (2013) Xinjiang Yanghai mudi xianmin de shiwu jiegou ji renqun zucheng tansuo (新疆洋海墓地先民的食物结构及人群组成探索 / Dietary Structure and Population Composition of the Ancient Inhabitants of the Yanghai Cemetery, Xinjiang). Kexue tongbao (科学通报 / Chinese Science Bulletin) 58:1422–1429
165	Yanghai	EIA-Ⅰ	-18	12.7	42.8	89.65	-42.9101	5.2	229	Si Y, Lu E, Li X, et al (2013) Xinjiang Yanghai mudi xianmin de shiwu jiegou ji renqun zucheng tansuo (新疆洋海墓地先民的食物结构及人群组成探索 / Dietary Structure and Population Composition of the Ancient Inhabitants of the Yanghai Cemetery, Xinjiang). Kexue tongbao (科学通报 / Chinese Science Bulletin) 58:1422–1429
166	Yanghai	EIA-Ⅰ	-16.2	11.3	42.8	89.65	-42.9101	5.2	229	Si Y, Lu E, Li X, et al (2013) Xinjiang Yanghai mudi xianmin de shiwu jiegou ji renqun zucheng tansuo (新疆洋海墓地先民的食物结构及人群组成探索 / Dietary Structure and Population Composition of the Ancient Inhabitants of the Yanghai Cemetery, Xinjiang). Kexue tongbao (科学通报 / Chinese Science Bulletin) 58:1422–1429
167	Yanghai	EIA-Ⅰ	-17.5	13.8	42.8	89.65	-42.9101	5.2	229	Si Y, Lu E, Li X, et al (2013) Xinjiang Yanghai mudi xianmin de shiwu jiegou ji renqun zucheng tansuo (新疆洋海墓地先民的食物结构及人群组成探索 / Dietary Structure and Population Composition of the Ancient Inhabitants of the Yanghai Cemetery, Xinjiang). Kexue tongbao (科学通报 / Chinese Science Bulletin) 58:1422–1429
168	Yanghai	EIA-Ⅰ	-15.6	12.4	42.8	89.65	-42.9101	5.2	229	Si Y, Lu E, Li X, et al (2013) Xinjiang Yanghai mudi xianmin de shiwu jiegou ji renqun zucheng tansuo (新疆洋海墓地先民的食物结构及人群组成探索 / Dietary Structure and Population Composition of the Ancient Inhabitants of the Yanghai Cemetery, Xinjiang). Kexue tongbao (科学通报 / Chinese Science Bulletin) 58:1422–1429
169	Yanghai	EIA-Ⅰ	-17.1	11.8	42.8	89.65	-42.9101	5.2	229	Si Y, Lu E, Li X, et al (2013) Xinjiang Yanghai mudi xianmin de shiwu jiegou ji renqun zucheng tansuo (新疆洋海墓地先民的食物结构及人群组成探索 / Dietary Structure and Population Composition of the Ancient Inhabitants of the Yanghai Cemetery, Xinjiang). Kexue tongbao (科学通报 / Chinese Science Bulletin) 58:1422–1429
170	Yanghai	EIA-Ⅰ	-16.1	14.1	42.8	89.65	-42.9101	5.2	229	Si Y, Lu E, Li X, et al (2013) Xinjiang Yanghai mudi xianmin de shiwu jiegou ji renqun zucheng tansuo (新疆洋海墓地先民的食物结构及人群组成探索 / Dietary Structure and Population Composition of the Ancient Inhabitants of the Yanghai Cemetery, Xinjiang). Kexue tongbao (科学通报 / Chinese Science Bulletin) 58:1422–1429
171	Yanghai	EIA-Ⅰ	-15.5	11.7	42.8	89.65	-42.9101	5.2	229	Si Y, Lu E, Li X, et al (2013) Xinjiang Yanghai mudi xianmin de shiwu jiegou ji renqun zucheng tansuo (新疆洋海墓地先民的食物结构及人群组成探索 / Dietary Structure and Population Composition of the Ancient Inhabitants of the Yanghai Cemetery, Xinjiang). Kexue tongbao (科学通报 / Chinese Science Bulletin) 58:1422–1429
172	Zhartas	EIA-Ⅱ	-18.6	14.5	49.5025	72.6594	513.614	177.7	150	Lightfoot E, Motuzaite-Matuzeviciute G, O’Connell TC, et al (2015) How ‘Pastoral’ is Pastoralism? Dietary Diversity in Bronze Age Communities in the Central Kazakhstan Steppes. Archaeometry 57:232–249. https://doi.org/10.1111/arcm.12123
173	Kotyrkora	EIA-Ⅱ	-17.81	13.19	49.9234	79.2664	300.619	168.6	156	Ananyevskaya E, Aytqaly AK, Beisenov AZ, et al (2018) Early indicators to C4 plant consumption in central Kazakhstan during the Final Bronze Age and Early Iron Age based on stable isotope analysis of human and animal bone collagen. Archaeological Research in Asia 15:157–173. https://doi.org/10.1016/j.ara.2017.12.002
174	Begash	EIA-Ⅱ	-15.02	13.41	44.7099	78.9442	2187.38	328.7	62	Hermes TR, Frachetti MD, Bullion EA, et al (2018) Urban and nomadic isotopic niches reveal dietary connectivities along Central Asia’s Silk Roads. Scientific Reports 8:5177
175	Karasuk III	EIA-Ⅱ	-16.9	13	54.5668	90.7498	301.423	265.4	133	Svyatko SV, Schulting RJ, Papin D, Reimer PJ (2021) MILLET CONSUMPTION IN SIBERIA PRIOR TO MID-SECOND MILLENNIUM BC? A REVIEW OF RECENT DEVELOPMENTS. Radiocarbon 63:1547–1554. https://doi.org/10.1017/RDC.2021.53
176	Lepeshkina	EIA-Ⅱ	-14.2	10.6	54.6432	90.9981	397.842	294.6	125	Svyatko SV, Schulting RJ, Papin D, Reimer PJ (2021) MILLET CONSUMPTION IN SIBERIA PRIOR TO MID-SECOND MILLENNIUM BC? A REVIEW OF RECENT DEVELOPMENTS. Radiocarbon 63:1547–1554. https://doi.org/10.1017/RDC.2021.53
177	Melnichniy-Barsuchinniy Log	EIA-Ⅱ	-16	10.2	54.5507	90.9928	513.855	261.5	120	Svyatko SV, Schulting RJ, Papin D, Reimer PJ (2021) MILLET CONSUMPTION IN SIBERIA PRIOR TO MID-SECOND MILLENNIUM BC? A REVIEW OF RECENT DEVELOPMENTS. Radiocarbon 63:1547–1554. https://doi.org/10.1017/RDC.2021.53
178	Melnichniy-Barsuchinniy Log	EIA-Ⅱ	-18.3	11	54.5507	90.9928	513.855	261.5	120	Svyatko SV, Schulting RJ, Papin D, Reimer PJ (2021) MILLET CONSUMPTION IN SIBERIA PRIOR TO MID-SECOND MILLENNIUM BC? A REVIEW OF RECENT DEVELOPMENTS. Radiocarbon 63:1547–1554. https://doi.org/10.1017/RDC.2021.53
179	Nurilkov Ulus	EIA-Ⅱ	-18.3	10.6	53.6085	91.4873	317.824	299.3	138	Svyatko SV, Schulting RJ, Papin D, Reimer PJ (2021) MILLET CONSUMPTION IN SIBERIA PRIOR TO MID-SECOND MILLENNIUM BC? A REVIEW OF RECENT DEVELOPMENTS. Radiocarbon 63:1547–1554. https://doi.org/10.1017/RDC.2021.53
180	Podgornoye Ozero	EIA-Ⅱ	-12	11.7	54.5205	90.9145	492.693	268.1	122	Svyatko SV, Schulting RJ, Papin D, Reimer PJ (2021) MILLET CONSUMPTION IN SIBERIA PRIOR TO MID-SECOND MILLENNIUM BC? A REVIEW OF RECENT DEVELOPMENTS. Radiocarbon 63:1547–1554. https://doi.org/10.1017/RDC.2021.53
181	Podgornoye Ozero	EIA-Ⅱ	-13.6	11.6	54.5205	90.9145	492.693	268.1	122	Svyatko SV, Schulting RJ, Papin D, Reimer PJ (2021) MILLET CONSUMPTION IN SIBERIA PRIOR TO MID-SECOND MILLENNIUM BC? A REVIEW OF RECENT DEVELOPMENTS. Radiocarbon 63:1547–1554. https://doi.org/10.1017/RDC.2021.53
182	Saragash Ozero	EIA-Ⅱ	-17.7	11.8	54.6908	90.7094	274.227	245.5	133	Svyatko SV, Schulting RJ, Papin D, Reimer PJ (2021) MILLET CONSUMPTION IN SIBERIA PRIOR TO MID-SECOND MILLENNIUM BC? A REVIEW OF RECENT DEVELOPMENTS. Radiocarbon 63:1547–1554. https://doi.org/10.1017/RDC.2021.53
183	Saragash	EIA-Ⅱ	-17.7	10.8	54.7189	90.7693	450.913	284.2	122	Svyatko SV, Schulting RJ, Papin D, Reimer PJ (2021) MILLET CONSUMPTION IN SIBERIA PRIOR TO MID-SECOND MILLENNIUM BC? A REVIEW OF RECENT DEVELOPMENTS. Radiocarbon 63:1547–1554. https://doi.org/10.1017/RDC.2021.53
184	Saragash	EIA-Ⅱ	-15.9	10.6	54.7189	90.7693	450.913	284.2	122	Svyatko SV, Schulting RJ, Papin D, Reimer PJ (2021) MILLET CONSUMPTION IN SIBERIA PRIOR TO MID-SECOND MILLENNIUM BC? A REVIEW OF RECENT DEVELOPMENTS. Radiocarbon 63:1547–1554. https://doi.org/10.1017/RDC.2021.53
185	Saragash	EIA-Ⅱ	-18.7	10.6	54.7189	90.7693	450.913	284.2	122	Svyatko SV, Schulting RJ, Papin D, Reimer PJ (2021) MILLET CONSUMPTION IN SIBERIA PRIOR TO MID-SECOND MILLENNIUM BC? A REVIEW OF RECENT DEVELOPMENTS. Radiocarbon 63:1547–1554. https://doi.org/10.1017/RDC.2021.53
186	Saragash	EIA-Ⅱ	-14.2	11.4	54.7189	90.7693	450.913	284.2	122	Svyatko SV, Schulting RJ, Papin D, Reimer PJ (2021) MILLET CONSUMPTION IN SIBERIA PRIOR TO MID-SECOND MILLENNIUM BC? A REVIEW OF RECENT DEVELOPMENTS. Radiocarbon 63:1547–1554. https://doi.org/10.1017/RDC.2021.53
187	Saragash	EIA-Ⅱ	-15.7	11.3	54.7189	90.7693	450.913	284.2	122	Svyatko SV, Schulting RJ, Papin D, Reimer PJ (2021) MILLET CONSUMPTION IN SIBERIA PRIOR TO MID-SECOND MILLENNIUM BC? A REVIEW OF RECENT DEVELOPMENTS. Radiocarbon 63:1547–1554. https://doi.org/10.1017/RDC.2021.53
188	Wulasitai	EIA-Ⅱ	-19.1096	13.0979	42.8478	86.4217	2006.9	279.8	114	This study
189	Dongheigou	EIA-Ⅱ	-17.74	13.49	43.5202	93.2291	2370.82	331	84	Xue L, Xi C, Jian-xin W, et al (2013) Carbon and nitrogen isotopic analysis of human bones excavated from the Dongheigou site, Ba Li-kun County, Xinjiang Autonomous Region. Acta Anthropologica Sinica 32:219
190	Dongheigou	EIA-Ⅱ	-18.02	12.95	43.5202	93.2291	2370.82	331	84	Xue L, Xi C, Jian-xin W, et al (2013) Carbon and nitrogen isotopic analysis of human bones excavated from the Dongheigou site, Ba Li-kun County, Xinjiang Autonomous Region. Acta Anthropologica Sinica 32:219
191	Dongheigou	EIA-Ⅱ	-18.36	13.24	43.5202	93.2291	2370.82	331	84	Xue L, Xi C, Jian-xin W, et al (2013) Carbon and nitrogen isotopic analysis of human bones excavated from the Dongheigou site, Ba Li-kun County, Xinjiang Autonomous Region. Acta Anthropologica Sinica 32:219
192	Duogang	EIA-Ⅱ	-15.01	12.25	41.8819	82.0564	1368.76	115.8	190	Zhang X, Qiu S, Zhang J, Guo W (2014) Xinjiang Duogang mudi chutuo ren gu de tan-dan wending tongweisu fenxi (新疆多岗墓地出土人骨的碳氮稳定同位素分析 / Stable Carbon and Nitrogen Isotope Analysis of Human Bones from the Duogang Cemetery, Xinjiang). Nanfang wenwu (南方文物 / Cultural Relics of Southern China) 79–91
193	Duogang	EIA-Ⅱ	-15.02	12.95	41.8819	82.0564	1368.76	115.8	190	Zhang X, Qiu S, Zhang J, Guo W (2014) Xinjiang Duogang mudi chutuo ren gu de tan-dan wending tongweisu fenxi (新疆多岗墓地出土人骨的碳氮稳定同位素分析 / Stable Carbon and Nitrogen Isotope Analysis of Human Bones from the Duogang Cemetery, Xinjiang). Nanfang wenwu (南方文物 / Cultural Relics of Southern China) 79–91
194	Duogang	EIA-Ⅱ	-14.88	12.48	41.8819	82.0564	1368.76	115.8	190	Zhang X, Qiu S, Zhang J, Guo W (2014) Xinjiang Duogang mudi chutuo ren gu de tan-dan wending tongweisu fenxi (新疆多岗墓地出土人骨的碳氮稳定同位素分析 / Stable Carbon and Nitrogen Isotope Analysis of Human Bones from the Duogang Cemetery, Xinjiang). Nanfang wenwu (南方文物 / Cultural Relics of Southern China) 79–91
195	Duogang	EIA-Ⅱ	-14.16	12.5	41.8819	82.0564	1368.76	115.8	190	Zhang X, Qiu S, Zhang J, Guo W (2014) Xinjiang Duogang mudi chutuo ren gu de tan-dan wending tongweisu fenxi (新疆多岗墓地出土人骨的碳氮稳定同位素分析 / Stable Carbon and Nitrogen Isotope Analysis of Human Bones from the Duogang Cemetery, Xinjiang). Nanfang wenwu (南方文物 / Cultural Relics of Southern China) 79–91
196	Duogang	EIA-Ⅱ	-14.35	11.23	41.8819	82.0564	1368.76	115.8	190	Zhang X, Qiu S, Zhang J, Guo W (2014) Xinjiang Duogang mudi chutuo ren gu de tan-dan wending tongweisu fenxi (新疆多岗墓地出土人骨的碳氮稳定同位素分析 / Stable Carbon and Nitrogen Isotope Analysis of Human Bones from the Duogang Cemetery, Xinjiang). Nanfang wenwu (南方文物 / Cultural Relics of Southern China) 79–91
197	Duogang	EIA-Ⅱ	-14.27	13.1	41.8819	82.0564	1368.76	115.8	190	Zhang X, Qiu S, Zhang J, Guo W (2014) Xinjiang Duogang mudi chutuo ren gu de tan-dan wending tongweisu fenxi (新疆多岗墓地出土人骨的碳氮稳定同位素分析 / Stable Carbon and Nitrogen Isotope Analysis of Human Bones from the Duogang Cemetery, Xinjiang). Nanfang wenwu (南方文物 / Cultural Relics of Southern China) 79–91
198	Duogang	EIA-Ⅱ	-12.32	11.23	41.8819	82.0564	1368.76	115.8	190	Zhang X, Qiu S, Zhang J, Guo W (2014) Xinjiang Duogang mudi chutuo ren gu de tan-dan wending tongweisu fenxi (新疆多岗墓地出土人骨的碳氮稳定同位素分析 / Stable Carbon and Nitrogen Isotope Analysis of Human Bones from the Duogang Cemetery, Xinjiang). Nanfang wenwu (南方文物 / Cultural Relics of Southern China) 79–91
199	Duogang	EIA-Ⅱ	-14.35	12.69	41.8819	82.0564	1368.76	115.8	190	Zhang X, Qiu S, Zhang J, Guo W (2014) Xinjiang Duogang mudi chutuo ren gu de tan-dan wending tongweisu fenxi (新疆多岗墓地出土人骨的碳氮稳定同位素分析 / Stable Carbon and Nitrogen Isotope Analysis of Human Bones from the Duogang Cemetery, Xinjiang). Nanfang wenwu (南方文物 / Cultural Relics of Southern China) 79–91
200	Heigouliang	EIA-Ⅱ	-18.51	12.64	43.5202	93.2291	2370.82	331	84	Zhang Q, Chang X, Liu G (2009) Xinjiang Balikun xian Heigouliang mudi chutuo ren gu de shixing fenxi (新疆巴里坤县黑沟梁墓地出土人骨的食性分析 / Dietary Analysis of Human Remains from the Heigouliang Cemetery, Balikun County, Xinjiang). Xiyu yanjiu (西域研究 / The Western Regions Studies) 45–49
201	Heigouliang	EIA-Ⅱ	-18.35	13.23	43.5202	93.2291	2370.82	331	84	Zhang Q, Chang X, Liu G (2009) Xinjiang Balikun xian Heigouliang mudi chutuo ren gu de shixing fenxi (新疆巴里坤县黑沟梁墓地出土人骨的食性分析 / Dietary Analysis of Human Remains from the Heigouliang Cemetery, Balikun County, Xinjiang). Xiyu yanjiu (西域研究 / The Western Regions Studies) 45–49
202	Heigouliang	EIA-Ⅱ	-18.4	12.9	43.5202	93.2291	2370.82	331	84	Zhang Q, Chang X, Liu G (2009) Xinjiang Balikun xian Heigouliang mudi chutuo ren gu de shixing fenxi (新疆巴里坤县黑沟梁墓地出土人骨的食性分析 / Dietary Analysis of Human Remains from the Heigouliang Cemetery, Balikun County, Xinjiang). Xiyu yanjiu (西域研究 / The Western Regions Studies) 45–49
203	Heigouliang	EIA-Ⅱ	-18.44	13.5	43.5202	93.2291	2370.82	331	84	Zhang Q, Chang X, Liu G (2009) Xinjiang Balikun xian Heigouliang mudi chutuo ren gu de shixing fenxi (新疆巴里坤县黑沟梁墓地出土人骨的食性分析 / Dietary Analysis of Human Remains from the Heigouliang Cemetery, Balikun County, Xinjiang). Xiyu yanjiu (西域研究 / The Western Regions Studies) 45–49
204	Heigouliang	EIA-Ⅱ	-17.62	13.46	43.5202	93.2291	2370.82	331	84	Zhang Q, Chang X, Liu G (2009) Xinjiang Balikun xian Heigouliang mudi chutuo ren gu de shixing fenxi (新疆巴里坤县黑沟梁墓地出土人骨的食性分析 / Dietary Analysis of Human Remains from the Heigouliang Cemetery, Balikun County, Xinjiang). Xiyu yanjiu (西域研究 / The Western Regions Studies) 45–49
205	Heigouliang	EIA-Ⅱ	-18.4	12.6	43.5202	93.2291	2370.82	331	84	Zhang Q, Chang X, Liu G (2009) Xinjiang Balikun xian Heigouliang mudi chutuo ren gu de shixing fenxi (新疆巴里坤县黑沟梁墓地出土人骨的食性分析 / Dietary Analysis of Human Remains from the Heigouliang Cemetery, Balikun County, Xinjiang). Xiyu yanjiu (西域研究 / The Western Regions Studies) 45–49
206	Heigouliang	EIA-Ⅱ	-18.45	13.13	43.5202	93.2291	2370.82	331	84	Zhang Q, Chang X, Liu G (2009) Xinjiang Balikun xian Heigouliang mudi chutuo ren gu de shixing fenxi (新疆巴里坤县黑沟梁墓地出土人骨的食性分析 / Dietary Analysis of Human Remains from the Heigouliang Cemetery, Balikun County, Xinjiang). Xiyu yanjiu (西域研究 / The Western Regions Studies) 45–49
207	Heigouliang	EIA-Ⅱ	-18.26	12.95	43.5202	93.2291	2370.82	331	84	Zhang Q, Chang X, Liu G (2009) Xinjiang Balikun xian Heigouliang mudi chutuo ren gu de shixing fenxi (新疆巴里坤县黑沟梁墓地出土人骨的食性分析 / Dietary Analysis of Human Remains from the Heigouliang Cemetery, Balikun County, Xinjiang). Xiyu yanjiu (西域研究 / The Western Regions Studies) 45–49
208	Heigouliang	EIA-Ⅱ	-18.6	12.58	43.5202	93.2291	2370.82	331	84	Zhang Q, Chang X, Liu G (2009) Xinjiang Balikun xian Heigouliang mudi chutuo ren gu de shixing fenxi (新疆巴里坤县黑沟梁墓地出土人骨的食性分析 / Dietary Analysis of Human Remains from the Heigouliang Cemetery, Balikun County, Xinjiang). Xiyu yanjiu (西域研究 / The Western Regions Studies) 45–49
209	Heigouliang	EIA-Ⅱ	-18.8	12.6	43.5202	93.2291	2370.82	331	84	Wang TT, Fuller BT, Wei D, et al (2016) Investigating Dietary Patterns with Stable Isotope Ratios of Collagen and Starch Grain Analysis of Dental Calculus at the Iron Age Cemetery Site of Heigouliang, Xinjiang, China. International Journal of Osteoarchaeology 26:693–704. https://doi.org/10.1002/oa.2467
210	Heigouliang	EIA-Ⅱ	-18.5	12.5	43.5202	93.2291	2370.82	331	84	Wang TT, Fuller BT, Wei D, et al (2016) Investigating Dietary Patterns with Stable Isotope Ratios of Collagen and Starch Grain Analysis of Dental Calculus at the Iron Age Cemetery Site of Heigouliang, Xinjiang, China. International Journal of Osteoarchaeology 26:693–704. https://doi.org/10.1002/oa.2467
211	Heigouliang	EIA-Ⅱ	-18.4	12.2	43.5202	93.2291	2370.82	331	84	Wang TT, Fuller BT, Wei D, et al (2016) Investigating Dietary Patterns with Stable Isotope Ratios of Collagen and Starch Grain Analysis of Dental Calculus at the Iron Age Cemetery Site of Heigouliang, Xinjiang, China. International Journal of Osteoarchaeology 26:693–704. https://doi.org/10.1002/oa.2467
212	Heigouliang	EIA-Ⅱ	-18.5	13.3	43.5202	93.2291	2370.82	331	84	Wang TT, Fuller BT, Wei D, et al (2016) Investigating Dietary Patterns with Stable Isotope Ratios of Collagen and Starch Grain Analysis of Dental Calculus at the Iron Age Cemetery Site of Heigouliang, Xinjiang, China. International Journal of Osteoarchaeology 26:693–704. https://doi.org/10.1002/oa.2467
213	Heigouliang	EIA-Ⅱ	-18.7	12.4	43.5202	93.2291	2370.82	331	84	Wang TT, Fuller BT, Wei D, et al (2016) Investigating Dietary Patterns with Stable Isotope Ratios of Collagen and Starch Grain Analysis of Dental Calculus at the Iron Age Cemetery Site of Heigouliang, Xinjiang, China. International Journal of Osteoarchaeology 26:693–704. https://doi.org/10.1002/oa.2467
214	Heigouliang	EIA-Ⅱ	-18.9	12.7	43.5202	93.2291	2370.82	331	84	Wang TT, Fuller BT, Wei D, et al (2016) Investigating Dietary Patterns with Stable Isotope Ratios of Collagen and Starch Grain Analysis of Dental Calculus at the Iron Age Cemetery Site of Heigouliang, Xinjiang, China. International Journal of Osteoarchaeology 26:693–704. https://doi.org/10.1002/oa.2467
215	Heigouliang	EIA-Ⅱ	-18.5	12.1	43.5202	93.2291	2370.82	331	84	Wang TT, Fuller BT, Wei D, et al (2016) Investigating Dietary Patterns with Stable Isotope Ratios of Collagen and Starch Grain Analysis of Dental Calculus at the Iron Age Cemetery Site of Heigouliang, Xinjiang, China. International Journal of Osteoarchaeology 26:693–704. https://doi.org/10.1002/oa.2467
216	Heigouliang	EIA-Ⅱ	-18.5	12	43.5202	93.2291	2370.82	331	84	Wang TT, Fuller BT, Wei D, et al (2016) Investigating Dietary Patterns with Stable Isotope Ratios of Collagen and Starch Grain Analysis of Dental Calculus at the Iron Age Cemetery Site of Heigouliang, Xinjiang, China. International Journal of Osteoarchaeology 26:693–704. https://doi.org/10.1002/oa.2467
217	Heigouliang	EIA-Ⅱ	-18.4	12.2	43.5202	93.2291	2370.82	331	84	Wang TT, Fuller BT, Wei D, et al (2016) Investigating Dietary Patterns with Stable Isotope Ratios of Collagen and Starch Grain Analysis of Dental Calculus at the Iron Age Cemetery Site of Heigouliang, Xinjiang, China. International Journal of Osteoarchaeology 26:693–704. https://doi.org/10.1002/oa.2467
218	Heigouliang	EIA-Ⅱ	-17.6	13.4	43.5202	93.2291	2370.82	331	84	Wang TT, Fuller BT, Wei D, et al (2016) Investigating Dietary Patterns with Stable Isotope Ratios of Collagen and Starch Grain Analysis of Dental Calculus at the Iron Age Cemetery Site of Heigouliang, Xinjiang, China. International Journal of Osteoarchaeology 26:693–704. https://doi.org/10.1002/oa.2467
219	Heigouliang	EIA-Ⅱ	-19.6	12.5	43.5202	93.2291	2370.82	331	84	Wang TT, Fuller BT, Wei D, et al (2016) Investigating Dietary Patterns with Stable Isotope Ratios of Collagen and Starch Grain Analysis of Dental Calculus at the Iron Age Cemetery Site of Heigouliang, Xinjiang, China. International Journal of Osteoarchaeology 26:693–704. https://doi.org/10.1002/oa.2467
220	Heigouliang	EIA-Ⅱ	-17	12.8	43.5202	93.2291	2370.82	331	84	Wang TT, Fuller BT, Wei D, et al (2016) Investigating Dietary Patterns with Stable Isotope Ratios of Collagen and Starch Grain Analysis of Dental Calculus at the Iron Age Cemetery Site of Heigouliang, Xinjiang, China. International Journal of Osteoarchaeology 26:693–704. https://doi.org/10.1002/oa.2467
221	Heigouliang	EIA-Ⅱ	-18.5	13.8	43.5202	93.2291	2370.82	331	84	Wang TT, Fuller BT, Wei D, et al (2016) Investigating Dietary Patterns with Stable Isotope Ratios of Collagen and Starch Grain Analysis of Dental Calculus at the Iron Age Cemetery Site of Heigouliang, Xinjiang, China. International Journal of Osteoarchaeology 26:693–704. https://doi.org/10.1002/oa.2467
222	Heigouliang	EIA-Ⅱ	-18.6	11.8	43.5202	93.2291	2370.82	331	84	Wang TT, Fuller BT, Wei D, et al (2016) Investigating Dietary Patterns with Stable Isotope Ratios of Collagen and Starch Grain Analysis of Dental Calculus at the Iron Age Cemetery Site of Heigouliang, Xinjiang, China. International Journal of Osteoarchaeology 26:693–704. https://doi.org/10.1002/oa.2467
223	Heigouliang	EIA-Ⅱ	-18.3	12.1	43.5202	93.2291	2370.82	331	84	Wang TT, Fuller BT, Wei D, et al (2016) Investigating Dietary Patterns with Stable Isotope Ratios of Collagen and Starch Grain Analysis of Dental Calculus at the Iron Age Cemetery Site of Heigouliang, Xinjiang, China. International Journal of Osteoarchaeology 26:693–704. https://doi.org/10.1002/oa.2467
224	Heigouliang	EIA-Ⅱ	-18.2	12	43.5202	93.2291	2370.82	331	84	Wang TT, Fuller BT, Wei D, et al (2016) Investigating Dietary Patterns with Stable Isotope Ratios of Collagen and Starch Grain Analysis of Dental Calculus at the Iron Age Cemetery Site of Heigouliang, Xinjiang, China. International Journal of Osteoarchaeology 26:693–704. https://doi.org/10.1002/oa.2467
225	Heigouliang	EIA-Ⅱ	-18.2	11.8	43.5202	93.2291	2370.82	331	84	Wang TT, Fuller BT, Wei D, et al (2016) Investigating Dietary Patterns with Stable Isotope Ratios of Collagen and Starch Grain Analysis of Dental Calculus at the Iron Age Cemetery Site of Heigouliang, Xinjiang, China. International Journal of Osteoarchaeology 26:693–704. https://doi.org/10.1002/oa.2467
226	Heigouliang	EIA-Ⅱ	-18.6	11.5	43.5202	93.2291	2370.82	331	84	Wang TT, Fuller BT, Wei D, et al (2016) Investigating Dietary Patterns with Stable Isotope Ratios of Collagen and Starch Grain Analysis of Dental Calculus at the Iron Age Cemetery Site of Heigouliang, Xinjiang, China. International Journal of Osteoarchaeology 26:693–704. https://doi.org/10.1002/oa.2467
227	Heigouliang	EIA-Ⅱ	-18.4	11.9	43.5202	93.2291	2370.82	331	84	Wang TT, Fuller BT, Wei D, et al (2016) Investigating Dietary Patterns with Stable Isotope Ratios of Collagen and Starch Grain Analysis of Dental Calculus at the Iron Age Cemetery Site of Heigouliang, Xinjiang, China. International Journal of Osteoarchaeology 26:693–704. https://doi.org/10.1002/oa.2467
228	Heigouliang	EIA-Ⅱ	-18.8	12.3	43.5202	93.2291	2370.82	331	84	Wang TT, Fuller BT, Wei D, et al (2016) Investigating Dietary Patterns with Stable Isotope Ratios of Collagen and Starch Grain Analysis of Dental Calculus at the Iron Age Cemetery Site of Heigouliang, Xinjiang, China. International Journal of Osteoarchaeology 26:693–704. https://doi.org/10.1002/oa.2467
229	Heigouliang	EIA-Ⅱ	-18.6	11.9	43.5202	93.2291	2370.82	331	84	Wang TT, Fuller BT, Wei D, et al (2016) Investigating Dietary Patterns with Stable Isotope Ratios of Collagen and Starch Grain Analysis of Dental Calculus at the Iron Age Cemetery Site of Heigouliang, Xinjiang, China. International Journal of Osteoarchaeology 26:693–704. https://doi.org/10.1002/oa.2467
230	Heigouliang	EIA-Ⅱ	-18.7	11.8	43.5202	93.2291	2370.82	331	84	Wang TT, Fuller BT, Wei D, et al (2016) Investigating Dietary Patterns with Stable Isotope Ratios of Collagen and Starch Grain Analysis of Dental Calculus at the Iron Age Cemetery Site of Heigouliang, Xinjiang, China. International Journal of Osteoarchaeology 26:693–704. https://doi.org/10.1002/oa.2467
231	Heigouliang	EIA-Ⅱ	-18.9	11.7	43.5202	93.2291	2370.82	331	84	Wang TT, Fuller BT, Wei D, et al (2016) Investigating Dietary Patterns with Stable Isotope Ratios of Collagen and Starch Grain Analysis of Dental Calculus at the Iron Age Cemetery Site of Heigouliang, Xinjiang, China. International Journal of Osteoarchaeology 26:693–704. https://doi.org/10.1002/oa.2467
232	Heigouliang	EIA-Ⅱ	-18.8	12.8	43.5202	93.2291	2370.82	331	84	Wang TT, Fuller BT, Wei D, et al (2016) Investigating Dietary Patterns with Stable Isotope Ratios of Collagen and Starch Grain Analysis of Dental Calculus at the Iron Age Cemetery Site of Heigouliang, Xinjiang, China. International Journal of Osteoarchaeology 26:693–704. https://doi.org/10.1002/oa.2467
233	Heigouliang	EIA-Ⅱ	-18.2	13.3	43.5202	93.2291	2370.82	331	84	Wang TT, Fuller BT, Wei D, et al (2016) Investigating Dietary Patterns with Stable Isotope Ratios of Collagen and Starch Grain Analysis of Dental Calculus at the Iron Age Cemetery Site of Heigouliang, Xinjiang, China. International Journal of Osteoarchaeology 26:693–704. https://doi.org/10.1002/oa.2467
234	Heigouliang	EIA-Ⅱ	-18.6	12.8	43.5202	93.2291	2370.82	331	84	Wang TT, Fuller BT, Wei D, et al (2016) Investigating Dietary Patterns with Stable Isotope Ratios of Collagen and Starch Grain Analysis of Dental Calculus at the Iron Age Cemetery Site of Heigouliang, Xinjiang, China. International Journal of Osteoarchaeology 26:693–704. https://doi.org/10.1002/oa.2467
235	Heigouliang	EIA-Ⅱ	-18.6	11.5	43.5202	93.2291	2370.82	331	84	Wang TT, Fuller BT, Wei D, et al (2016) Investigating Dietary Patterns with Stable Isotope Ratios of Collagen and Starch Grain Analysis of Dental Calculus at the Iron Age Cemetery Site of Heigouliang, Xinjiang, China. International Journal of Osteoarchaeology 26:693–704. https://doi.org/10.1002/oa.2467
236	Kalasu	EIA-Ⅱ	-16.7	12	42.8044	80.3	1725.05	293.1	127	Chen X, Yu J, You Y (2017b) Horse burial customs in Kalasu cemetery of Xinjiang seen from stable carbon and nitrogen isotope. W Reg Stud 4:89–98
237	Kalasu	EIA-Ⅱ	-16.4	10.9	42.8044	80.3	1725.05	293.1	127	Chen X, Yu J, You Y (2017b) Horse burial customs in Kalasu cemetery of Xinjiang seen from stable carbon and nitrogen isotope. W Reg Stud 4:89–98
238	Kalasu	EIA-Ⅱ	-16.6	11.5	42.8044	80.3	1725.05	293.1	127	Chen X, Yu J, You Y (2017b) Horse burial customs in Kalasu cemetery of Xinjiang seen from stable carbon and nitrogen isotope. W Reg Stud 4:89–98
239	Kalasu	EIA-Ⅱ	-17	11.9	42.8044	80.3	1725.05	293.1	127	Chen X, Yu J, You Y (2017b) Horse burial customs in Kalasu cemetery of Xinjiang seen from stable carbon and nitrogen isotope. W Reg Stud 4:89–98
240	Kalasu	EIA-Ⅱ	-17.2	11.5	42.8044	80.3	1725.05	293.1	127	Chen X, Yu J, You Y (2017b) Horse burial customs in Kalasu cemetery of Xinjiang seen from stable carbon and nitrogen isotope. W Reg Stud 4:89–98
241	Kalasu	EIA-Ⅱ	-16.1	12.6	42.8044	80.3	1725.05	293.1	127	Chen X, Yu J, You Y (2017b) Horse burial customs in Kalasu cemetery of Xinjiang seen from stable carbon and nitrogen isotope. W Reg Stud 4:89–98
242	Kalasu	EIA-Ⅱ	-16.3	12.5	42.8044	80.3	1725.05	293.1	127	Chen X, Yu J, You Y (2017b) Horse burial customs in Kalasu cemetery of Xinjiang seen from stable carbon and nitrogen isotope. W Reg Stud 4:89–98
243	Kalasu	EIA-Ⅱ	-17.4	13.7	42.8044	80.3	1725.05	293.1	127	Dong WM, An CB, Yu JJ, Chen XL (2022b) The subsistence strategy of the residents in the Bronze–early Iron Age Altay region and its implications: evidence from bone stable isotopes. West Reg Stud 1:45–54
244	Kalasu	EIA-Ⅱ	-17.5	12.9	42.8044	80.3	1725.05	293.1	127	Dong WM, An CB, Yu JJ, Chen XL (2022b) The subsistence strategy of the residents in the Bronze–early Iron Age Altay region and its implications: evidence from bone stable isotopes. West Reg Stud 1:45–54
245	Kalasu	EIA-Ⅱ	-17.2	12.1	42.8044	80.3	1725.05	293.1	127	Dong WM, An CB, Yu JJ, Chen XL (2022b) The subsistence strategy of the residents in the Bronze–early Iron Age Altay region and its implications: evidence from bone stable isotopes. West Reg Stud 1:45–54
246	Kalasu	EIA-Ⅱ	-17.3	11.4	42.8044	80.3	1725.05	293.1	127	Dong WM, An CB, Yu JJ, Chen XL (2022b) The subsistence strategy of the residents in the Bronze–early Iron Age Altay region and its implications: evidence from bone stable isotopes. West Reg Stud 1:45–54
247	Kalasu	EIA-Ⅱ	-16.8	14.5	42.8044	80.3	1725.05	293.1	127	Dong WM, An CB, Yu JJ, Chen XL (2022b) The subsistence strategy of the residents in the Bronze–early Iron Age Altay region and its implications: evidence from bone stable isotopes. West Reg Stud 1:45–54
248	Kalasu	EIA-Ⅱ	-17	12.6	42.8044	80.3	1725.05	293.1	127	Dong WM, An CB, Yu JJ, Chen XL (2022b) The subsistence strategy of the residents in the Bronze–early Iron Age Altay region and its implications: evidence from bone stable isotopes. West Reg Stud 1:45–54
249	Kalasu	EIA-Ⅱ	-17.5	13.7	42.8044	80.3	1725.05	293.1	127	Dong WM, An CB, Yu JJ, Chen XL (2022b) The subsistence strategy of the residents in the Bronze–early Iron Age Altay region and its implications: evidence from bone stable isotopes. West Reg Stud 1:45–54
250	Kalasu	EIA-Ⅱ	-16.8	11.4	42.8044	80.3	1725.05	293.1	127	Dong WM, An CB, Yu JJ, Chen XL (2022b) The subsistence strategy of the residents in the Bronze–early Iron Age Altay region and its implications: evidence from bone stable isotopes. West Reg Stud 1:45–54
251	Kalasu	EIA-Ⅱ	-17.7	11.8	42.8044	80.3	1725.05	293.1	127	Dong WM, An CB, Yu JJ, Chen XL (2022b) The subsistence strategy of the residents in the Bronze–early Iron Age Altay region and its implications: evidence from bone stable isotopes. West Reg Stud 1:45–54
252	Kalasu	EIA-Ⅱ	-16.8	12.6	42.8044	80.3	1725.05	293.1	127	Dong WM, An CB, Yu JJ, Chen XL (2022b) The subsistence strategy of the residents in the Bronze–early Iron Age Altay region and its implications: evidence from bone stable isotopes. West Reg Stud 1:45–54
253	Kalasu	EIA-Ⅱ	-17.1	12.3	42.8044	80.3	1725.05	293.1	127	Dong WM, An CB, Yu JJ, Chen XL (2022b) The subsistence strategy of the residents in the Bronze–early Iron Age Altay region and its implications: evidence from bone stable isotopes. West Reg Stud 1:45–54
254	Tuwaxincun	EIA-Ⅱ	-18.7	10.2	48.5796	87.4633	1204.39	293.2	117	Dong WM, An CB, Yu JJ, Chen XL (2022b) The subsistence strategy of the residents in the Bronze–early Iron Age Altay region and its implications: evidence from bone stable isotopes. West Reg Stud 1:45–54
255	Tuwaxincun	EIA-Ⅱ	-17.8	10.8	48.5796	87.4633	1204.39	293.2	117	Dong WM, An CB, Yu JJ, Chen XL (2022b) The subsistence strategy of the residents in the Bronze–early Iron Age Altay region and its implications: evidence from bone stable isotopes. West Reg Stud 1:45–54
256	Xiaxinguang	EIA-Ⅱ	-18.4019	11.9781	42.862	86.4424	2082.82	298.8	108	This study
257	Xiaxinguang	EIA-Ⅱ	-18.0916	12.0681	42.862	86.4424	2082.82	298.8	108	This study
258	Xiaxinguang	EIA-Ⅱ	-18.1832	11.3584	42.862	86.4424	2082.82	298.8	108	This study
259	Xiaxinguang	EIA-Ⅱ	-18.2429	11.4033	42.862	86.4424	2082.82	298.8	108	This study
260	Xiaxinguang	EIA-Ⅱ	-17.9202	11.9001	42.862	86.4424	2082.82	298.8	108	This study
261	Xiaxinguang	EIA-Ⅱ	-19.3236	4.63315	42.862	86.4424	2082.82	298.8	108	This study
262	Yanghai	EIA-Ⅱ	-15.9	10.8	42.8	89.65	-42.9101	5.2	229	Si Y, Lu E, Li X, et al (2013) Xinjiang Yanghai mudi xianmin de shiwu jiegou ji renqun zucheng tansuo (新疆洋海墓地先民的食物结构及人群组成探索 / Dietary Structure and Population Composition of the Ancient Inhabitants of the Yanghai Cemetery, Xinjiang). Kexue tongbao (科学通报 / Chinese Science Bulletin) 58:1422–1429
263	Yanghai	EIA-Ⅱ	-16.4	13.7	42.8	89.65	-42.9101	5.2	229	Si Y, Lu E, Li X, et al (2013) Xinjiang Yanghai mudi xianmin de shiwu jiegou ji renqun zucheng tansuo (新疆洋海墓地先民的食物结构及人群组成探索 / Dietary Structure and Population Composition of the Ancient Inhabitants of the Yanghai Cemetery, Xinjiang). Kexue tongbao (科学通报 / Chinese Science Bulletin) 58:1422–1429
264	Yanghai	EIA-Ⅱ	-15.2	12.7	42.8	89.65	-42.9101	5.2	229	Si Y, Lu E, Li X, et al (2013) Xinjiang Yanghai mudi xianmin de shiwu jiegou ji renqun zucheng tansuo (新疆洋海墓地先民的食物结构及人群组成探索 / Dietary Structure and Population Composition of the Ancient Inhabitants of the Yanghai Cemetery, Xinjiang). Kexue tongbao (科学通报 / Chinese Science Bulletin) 58:1422–1429
265	Yanghai	EIA-Ⅱ	-16.5	11.4	42.8	89.65	-42.9101	5.2	229	Si Y, Lu E, Li X, et al (2013) Xinjiang Yanghai mudi xianmin de shiwu jiegou ji renqun zucheng tansuo (新疆洋海墓地先民的食物结构及人群组成探索 / Dietary Structure and Population Composition of the Ancient Inhabitants of the Yanghai Cemetery, Xinjiang). Kexue tongbao (科学通报 / Chinese Science Bulletin) 58:1422–1429
266	Yanghai	EIA-Ⅱ	-16.6	12.2	42.8	89.65	-42.9101	5.2	229	Si Y, Lu E, Li X, et al (2013) Xinjiang Yanghai mudi xianmin de shiwu jiegou ji renqun zucheng tansuo (新疆洋海墓地先民的食物结构及人群组成探索 / Dietary Structure and Population Composition of the Ancient Inhabitants of the Yanghai Cemetery, Xinjiang). Kexue tongbao (科学通报 / Chinese Science Bulletin) 58:1422–1429
267	Yanghai	EIA-Ⅱ	-17.3	11.5	42.8	89.65	-42.9101	5.2	229	Si Y, Lu E, Li X, et al (2013) Xinjiang Yanghai mudi xianmin de shiwu jiegou ji renqun zucheng tansuo (新疆洋海墓地先民的食物结构及人群组成探索 / Dietary Structure and Population Composition of the Ancient Inhabitants of the Yanghai Cemetery, Xinjiang). Kexue tongbao (科学通报 / Chinese Science Bulletin) 58:1422–1429
268	Yanghai	EIA-Ⅱ	-16.7	11.3	42.8	89.65	-42.9101	5.2	229	Si Y, Lu E, Li X, et al (2013) Xinjiang Yanghai mudi xianmin de shiwu jiegou ji renqun zucheng tansuo (新疆洋海墓地先民的食物结构及人群组成探索 / Dietary Structure and Population Composition of the Ancient Inhabitants of the Yanghai Cemetery, Xinjiang). Kexue tongbao (科学通报 / Chinese Science Bulletin) 58:1422–1429
269	Yanghai	EIA-Ⅱ	-16.4	11.6	42.8	89.65	-42.9101	5.2	229	Si Y, Lu E, Li X, et al (2013) Xinjiang Yanghai mudi xianmin de shiwu jiegou ji renqun zucheng tansuo (新疆洋海墓地先民的食物结构及人群组成探索 / Dietary Structure and Population Composition of the Ancient Inhabitants of the Yanghai Cemetery, Xinjiang). Kexue tongbao (科学通报 / Chinese Science Bulletin) 58:1422–1429
270	Yanghai	EIA-Ⅱ	-17.8	11.3	42.8	89.65	-42.9101	5.2	229	Si Y, Lu E, Li X, et al (2013) Xinjiang Yanghai mudi xianmin de shiwu jiegou ji renqun zucheng tansuo (新疆洋海墓地先民的食物结构及人群组成探索 / Dietary Structure and Population Composition of the Ancient Inhabitants of the Yanghai Cemetery, Xinjiang). Kexue tongbao (科学通报 / Chinese Science Bulletin) 58:1422–1429
271	Yanghai	EIA-Ⅱ	-16.5	10.7	42.8	89.65	-42.9101	5.2	229	Si Y, Lu E, Li X, et al (2013) Xinjiang Yanghai mudi xianmin de shiwu jiegou ji renqun zucheng tansuo (新疆洋海墓地先民的食物结构及人群组成探索 / Dietary Structure and Population Composition of the Ancient Inhabitants of the Yanghai Cemetery, Xinjiang). Kexue tongbao (科学通报 / Chinese Science Bulletin) 58:1422–1429
272	Yanghai	EIA-Ⅱ	-17.3	12.1	42.8	89.65	-42.9101	5.2	229	Si Y, Lu E, Li X, et al (2013) Xinjiang Yanghai mudi xianmin de shiwu jiegou ji renqun zucheng tansuo (新疆洋海墓地先民的食物结构及人群组成探索 / Dietary Structure and Population Composition of the Ancient Inhabitants of the Yanghai Cemetery, Xinjiang). Kexue tongbao (科学通报 / Chinese Science Bulletin) 58:1422–1429
273	Yanghai	EIA-Ⅱ	-13.1	11.8	42.8	89.65	-42.9101	5.2	229	Si Y, Lu E, Li X, et al (2013) Xinjiang Yanghai mudi xianmin de shiwu jiegou ji renqun zucheng tansuo (新疆洋海墓地先民的食物结构及人群组成探索 / Dietary Structure and Population Composition of the Ancient Inhabitants of the Yanghai Cemetery, Xinjiang). Kexue tongbao (科学通报 / Chinese Science Bulletin) 58:1422–1429
274	Yanghai	EIA-Ⅱ	-15.5	13.6	42.8	89.65	-42.9101	5.2	229	Si Y, Lu E, Li X, et al (2013) Xinjiang Yanghai mudi xianmin de shiwu jiegou ji renqun zucheng tansuo (新疆洋海墓地先民的食物结构及人群组成探索 / Dietary Structure and Population Composition of the Ancient Inhabitants of the Yanghai Cemetery, Xinjiang). Kexue tongbao (科学通报 / Chinese Science Bulletin) 58:1422–1429
275	Yanghai	EIA-Ⅱ	-15.1	13.6	42.8	89.65	-42.9101	5.2	229	Si Y, Lu E, Li X, et al (2013) Xinjiang Yanghai mudi xianmin de shiwu jiegou ji renqun zucheng tansuo (新疆洋海墓地先民的食物结构及人群组成探索 / Dietary Structure and Population Composition of the Ancient Inhabitants of the Yanghai Cemetery, Xinjiang). Kexue tongbao (科学通报 / Chinese Science Bulletin) 58:1422–1429
276	Yanghai	EIA-Ⅱ	-16	11.3	42.8	89.65	-42.9101	5.2	229	Si Y, Lu E, Li X, et al (2013) Xinjiang Yanghai mudi xianmin de shiwu jiegou ji renqun zucheng tansuo (新疆洋海墓地先民的食物结构及人群组成探索 / Dietary Structure and Population Composition of the Ancient Inhabitants of the Yanghai Cemetery, Xinjiang). Kexue tongbao (科学通报 / Chinese Science Bulletin) 58:1422–1429
277	Okunev Ulus	EIA-Ⅲ	-18	10.4	53.5568	90.1951	761.489	318.8	106	Svyatko SV, Schulting RJ, Papin D, Reimer PJ (2021) MILLET CONSUMPTION IN SIBERIA PRIOR TO MID-SECOND MILLENNIUM BC? A REVIEW OF RECENT DEVELOPMENTS. Radiocarbon 63:1547–1554. https://doi.org/10.1017/RDC.2021.53
278	Nurilkov Ulus	EIA-Ⅲ	-11.8	12.5	53.6085	91.4873	317.824	299.3	138	Svyatko SV, Schulting RJ, Papin D, Reimer PJ (2021) MILLET CONSUMPTION IN SIBERIA PRIOR TO MID-SECOND MILLENNIUM BC? A REVIEW OF RECENT DEVELOPMENTS. Radiocarbon 63:1547–1554. https://doi.org/10.1017/RDC.2021.53
279	Karatuma	EIA-Ⅲ	-16.4	10.6	43.623	78.2684	587.544	263.7	200	Motuzaite Matuzeviciute G, Lightfoot E, O’Connell TC, et al (2015) The extent of cereal cultivation among the Bronze Age to Turkic period societies of Kazakhstan determined using stable isotope analysis of bone collagen. Journal of Archaeological Science 59:23–34. https://doi.org/10.1016/j.jas.2015.03.029
280	Karatuma	EIA-Ⅲ	-13.2397	12.4	43.623	78.2684	587.544	263.7	200	Motuzaite Matuzeviciute G, Lightfoot E, O’Connell TC, et al (2015) The extent of cereal cultivation among the Bronze Age to Turkic period societies of Kazakhstan determined using stable isotope analysis of bone collagen. Journal of Archaeological Science 59:23–34. https://doi.org/10.1016/j.jas.2015.03.029
281	Chandman Mountain	EIA-Ⅲ	-16.6	14	49.9971	92.054	923.386	157	147	Wilkin S, Ventresca Miller A, Miller BK, et al (2020) Economic Diversification Supported the Growth of Mongolia’s Nomadic Empires. Sci Rep 10:3916. https://doi.org/10.1038/s41598-020-60194-0
282	Yarki I	EIA-Ⅲ	-15.7	10.4	54.5183	91.1088	439.411	256.7	121	Svyatko SV, Schulting RJ, Papin D, Reimer PJ (2021) MILLET CONSUMPTION IN SIBERIA PRIOR TO MID-SECOND MILLENNIUM BC? A REVIEW OF RECENT DEVELOPMENTS. Radiocarbon 63:1547–1554. https://doi.org/10.1017/RDC.2021.53
283	Karatuma	EIA-Ⅲ	-14.97	13.4	43.623	78.2684	587.544	263.7	200	Motuzaite Matuzeviciute G, Lightfoot E, O’Connell TC, et al (2015) The extent of cereal cultivation among the Bronze Age to Turkic period societies of Kazakhstan determined using stable isotope analysis of bone collagen. Journal of Archaeological Science 59:23–34. https://doi.org/10.1016/j.jas.2015.03.029
284	Karatuma	EIA-Ⅲ	-15.11	14.8	43.623	78.2684	587.544	263.7	200	Motuzaite Matuzeviciute G, Lightfoot E, O’Connell TC, et al (2015) The extent of cereal cultivation among the Bronze Age to Turkic period societies of Kazakhstan determined using stable isotope analysis of bone collagen. Journal of Archaeological Science 59:23–34. https://doi.org/10.1016/j.jas.2015.03.029
285	Karatuma	EIA-Ⅲ	-16.03	11.7	43.623	78.2684	587.544	263.7	200	Motuzaite Matuzeviciute G, Lightfoot E, O’Connell TC, et al (2015) The extent of cereal cultivation among the Bronze Age to Turkic period societies of Kazakhstan determined using stable isotope analysis of bone collagen. Journal of Archaeological Science 59:23–34. https://doi.org/10.1016/j.jas.2015.03.029
286	Karatuma	EIA-Ⅲ	-16.33	12.1	43.623	78.2684	587.544	263.7	200	Motuzaite Matuzeviciute G, Lightfoot E, O’Connell TC, et al (2015) The extent of cereal cultivation among the Bronze Age to Turkic period societies of Kazakhstan determined using stable isotope analysis of bone collagen. Journal of Archaeological Science 59:23–34. https://doi.org/10.1016/j.jas.2015.03.029
287	Karatuma	EIA-Ⅲ	-15.52	14.2	43.623	78.2684	587.544	263.7	200	Motuzaite Matuzeviciute G, Lightfoot E, O’Connell TC, et al (2015) The extent of cereal cultivation among the Bronze Age to Turkic period societies of Kazakhstan determined using stable isotope analysis of bone collagen. Journal of Archaeological Science 59:23–34. https://doi.org/10.1016/j.jas.2015.03.029
288	Karatuma	EIA-Ⅲ	-15.24	11.1	43.623	78.2684	587.544	263.7	200	Motuzaite Matuzeviciute G, Lightfoot E, O’Connell TC, et al (2015) The extent of cereal cultivation among the Bronze Age to Turkic period societies of Kazakhstan determined using stable isotope analysis of bone collagen. Journal of Archaeological Science 59:23–34. https://doi.org/10.1016/j.jas.2015.03.029
289	Karatuma	EIA-Ⅲ	-15.98	12	43.623	78.2684	587.544	263.7	200	Motuzaite Matuzeviciute G, Lightfoot E, O’Connell TC, et al (2015) The extent of cereal cultivation among the Bronze Age to Turkic period societies of Kazakhstan determined using stable isotope analysis of bone collagen. Journal of Archaeological Science 59:23–34. https://doi.org/10.1016/j.jas.2015.03.029
290	Karatuma	EIA-Ⅲ	-14.45	12.4	43.623	78.2684	587.544	263.7	200	Motuzaite Matuzeviciute G, Lightfoot E, O’Connell TC, et al (2015) The extent of cereal cultivation among the Bronze Age to Turkic period societies of Kazakhstan determined using stable isotope analysis of bone collagen. Journal of Archaeological Science 59:23–34. https://doi.org/10.1016/j.jas.2015.03.029
291	Karatuma	EIA-Ⅲ	-14.94	9	43.623	78.2684	587.544	263.7	200	Motuzaite Matuzeviciute G, Lightfoot E, O’Connell TC, et al (2015) The extent of cereal cultivation among the Bronze Age to Turkic period societies of Kazakhstan determined using stable isotope analysis of bone collagen. Journal of Archaeological Science 59:23–34. https://doi.org/10.1016/j.jas.2015.03.029
292	Karatuma	EIA-Ⅲ	-14.98	13.5	43.623	78.2684	587.544	263.7	200	Motuzaite Matuzeviciute G, Lightfoot E, O’Connell TC, et al (2015) The extent of cereal cultivation among the Bronze Age to Turkic period societies of Kazakhstan determined using stable isotope analysis of bone collagen. Journal of Archaeological Science 59:23–34. https://doi.org/10.1016/j.jas.2015.03.029
293	Karatuma	EIA-Ⅲ	-16.17	12.1	43.623	78.2684	587.544	263.7	200	Motuzaite Matuzeviciute G, Lightfoot E, O’Connell TC, et al (2015) The extent of cereal cultivation among the Bronze Age to Turkic period societies of Kazakhstan determined using stable isotope analysis of bone collagen. Journal of Archaeological Science 59:23–34. https://doi.org/10.1016/j.jas.2015.03.029
294	Karatuma	EIA-Ⅲ	-14.38	13	43.623	78.2684	587.544	263.7	200	Motuzaite Matuzeviciute G, Lightfoot E, O’Connell TC, et al (2015) The extent of cereal cultivation among the Bronze Age to Turkic period societies of Kazakhstan determined using stable isotope analysis of bone collagen. Journal of Archaeological Science 59:23–34. https://doi.org/10.1016/j.jas.2015.03.029
295	Karatuma	EIA-Ⅲ	-16.23	12.1	43.623	78.2684	587.544	263.7	200	Motuzaite Matuzeviciute G, Lightfoot E, O’Connell TC, et al (2015) The extent of cereal cultivation among the Bronze Age to Turkic period societies of Kazakhstan determined using stable isotope analysis of bone collagen. Journal of Archaeological Science 59:23–34. https://doi.org/10.1016/j.jas.2015.03.029
296	Karatuma	EIA-Ⅲ	-12.9	17.2	43.623	78.2684	587.544	263.7	200	Motuzaite Matuzeviciute G, Lightfoot E, O’Connell TC, et al (2015) The extent of cereal cultivation among the Bronze Age to Turkic period societies of Kazakhstan determined using stable isotope analysis of bone collagen. Journal of Archaeological Science 59:23–34. https://doi.org/10.1016/j.jas.2015.03.029
297	Karatuma	EIA-Ⅲ	-16.9	10.7	43.623	78.2684	587.544	263.7	200	Motuzaite Matuzeviciute G, Lightfoot E, O’Connell TC, et al (2015) The extent of cereal cultivation among the Bronze Age to Turkic period societies of Kazakhstan determined using stable isotope analysis of bone collagen. Journal of Archaeological Science 59:23–34. https://doi.org/10.1016/j.jas.2015.03.029
298	Karatuma	EIA-Ⅲ	-14.7	13.6	43.623	78.2684	587.544	263.7	200	Motuzaite Matuzeviciute G, Lightfoot E, O’Connell TC, et al (2015) The extent of cereal cultivation among the Bronze Age to Turkic period societies of Kazakhstan determined using stable isotope analysis of bone collagen. Journal of Archaeological Science 59:23–34. https://doi.org/10.1016/j.jas.2015.03.029
299	Karatuma	EIA-Ⅲ	-16.5	12.5	43.623	78.2684	587.544	263.7	200	Motuzaite Matuzeviciute G, Lightfoot E, O’Connell TC, et al (2015) The extent of cereal cultivation among the Bronze Age to Turkic period societies of Kazakhstan determined using stable isotope analysis of bone collagen. Journal of Archaeological Science 59:23–34. https://doi.org/10.1016/j.jas.2015.03.029
300	Karatuma	EIA-Ⅲ	-15.4	12.7	43.623	78.2684	587.544	263.7	200	Motuzaite Matuzeviciute G, Lightfoot E, O’Connell TC, et al (2015) The extent of cereal cultivation among the Bronze Age to Turkic period societies of Kazakhstan determined using stable isotope analysis of bone collagen. Journal of Archaeological Science 59:23–34. https://doi.org/10.1016/j.jas.2015.03.029
301	Karatuma	EIA-Ⅲ	-16	12.2	43.623	78.2684	587.544	263.7	200	Motuzaite Matuzeviciute G, Lightfoot E, O’Connell TC, et al (2015) The extent of cereal cultivation among the Bronze Age to Turkic period societies of Kazakhstan determined using stable isotope analysis of bone collagen. Journal of Archaeological Science 59:23–34. https://doi.org/10.1016/j.jas.2015.03.029
302	Karatuma	EIA-Ⅲ	-15.9	12.3	43.623	78.2684	587.544	263.7	200	Motuzaite Matuzeviciute G, Lightfoot E, O’Connell TC, et al (2015) The extent of cereal cultivation among the Bronze Age to Turkic period societies of Kazakhstan determined using stable isotope analysis of bone collagen. Journal of Archaeological Science 59:23–34. https://doi.org/10.1016/j.jas.2015.03.029
303	Karatuma	EIA-Ⅲ	-15.8	12.7	43.623	78.2684	587.544	263.7	200	Motuzaite Matuzeviciute G, Lightfoot E, O’Connell TC, et al (2015) The extent of cereal cultivation among the Bronze Age to Turkic period societies of Kazakhstan determined using stable isotope analysis of bone collagen. Journal of Archaeological Science 59:23–34. https://doi.org/10.1016/j.jas.2015.03.029
304	Karatuma	EIA-Ⅲ	-16.1	13.4	43.623	78.2684	587.544	263.7	200	Motuzaite Matuzeviciute G, Lightfoot E, O’Connell TC, et al (2015) The extent of cereal cultivation among the Bronze Age to Turkic period societies of Kazakhstan determined using stable isotope analysis of bone collagen. Journal of Archaeological Science 59:23–34. https://doi.org/10.1016/j.jas.2015.03.029
305	Karatuma	EIA-Ⅲ	-16.3	10.7	43.623	78.2684	587.544	263.7	200	Motuzaite Matuzeviciute G, Lightfoot E, O’Connell TC, et al (2015) The extent of cereal cultivation among the Bronze Age to Turkic period societies of Kazakhstan determined using stable isotope analysis of bone collagen. Journal of Archaeological Science 59:23–34. https://doi.org/10.1016/j.jas.2015.03.029
306	Karatuma	EIA-Ⅲ	-16.8	12.9	43.623	78.2684	587.544	263.7	200	Motuzaite Matuzeviciute G, Lightfoot E, O’Connell TC, et al (2015) The extent of cereal cultivation among the Bronze Age to Turkic period societies of Kazakhstan determined using stable isotope analysis of bone collagen. Journal of Archaeological Science 59:23–34. https://doi.org/10.1016/j.jas.2015.03.029
307	Karatuma	EIA-Ⅲ	-15.1	12.3	43.623	78.2684	587.544	263.7	200	Motuzaite Matuzeviciute G, Lightfoot E, O’Connell TC, et al (2015) The extent of cereal cultivation among the Bronze Age to Turkic period societies of Kazakhstan determined using stable isotope analysis of bone collagen. Journal of Archaeological Science 59:23–34. https://doi.org/10.1016/j.jas.2015.03.029
308	Karatuma	EIA-Ⅲ	-15.2	13.3	43.623	78.2684	587.544	263.7	200	Motuzaite Matuzeviciute G, Lightfoot E, O’Connell TC, et al (2015) The extent of cereal cultivation among the Bronze Age to Turkic period societies of Kazakhstan determined using stable isotope analysis of bone collagen. Journal of Archaeological Science 59:23–34. https://doi.org/10.1016/j.jas.2015.03.029
309	Karatuma	EIA-Ⅲ	-13.8	13.2	43.623	78.2684	587.544	263.7	200	Motuzaite Matuzeviciute G, Lightfoot E, O’Connell TC, et al (2015) The extent of cereal cultivation among the Bronze Age to Turkic period societies of Kazakhstan determined using stable isotope analysis of bone collagen. Journal of Archaeological Science 59:23–34. https://doi.org/10.1016/j.jas.2015.03.029
310	Karatuma	EIA-Ⅲ	-15.8	11.8	43.623	78.2684	587.544	263.7	200	Motuzaite Matuzeviciute G, Lightfoot E, O’Connell TC, et al (2015) The extent of cereal cultivation among the Bronze Age to Turkic period societies of Kazakhstan determined using stable isotope analysis of bone collagen. Journal of Archaeological Science 59:23–34. https://doi.org/10.1016/j.jas.2015.03.029
311	Karatuma	EIA-Ⅲ	-17	9	43.623	78.2684	587.544	263.7	200	Motuzaite Matuzeviciute G, Lightfoot E, O’Connell TC, et al (2015) The extent of cereal cultivation among the Bronze Age to Turkic period societies of Kazakhstan determined using stable isotope analysis of bone collagen. Journal of Archaeological Science 59:23–34. https://doi.org/10.1016/j.jas.2015.03.029
312	Karatuma	EIA-Ⅲ	-14	12.6	43.623	78.2684	587.544	263.7	200	Motuzaite Matuzeviciute G, Lightfoot E, O’Connell TC, et al (2015) The extent of cereal cultivation among the Bronze Age to Turkic period societies of Kazakhstan determined using stable isotope analysis of bone collagen. Journal of Archaeological Science 59:23–34. https://doi.org/10.1016/j.jas.2015.03.029
313	Karatuma	EIA-Ⅲ	-14.8	13.5	43.623	78.2684	587.544	263.7	200	Motuzaite Matuzeviciute G, Lightfoot E, O’Connell TC, et al (2015) The extent of cereal cultivation among the Bronze Age to Turkic period societies of Kazakhstan determined using stable isotope analysis of bone collagen. Journal of Archaeological Science 59:23–34. https://doi.org/10.1016/j.jas.2015.03.029
314	Karatuma	EIA-Ⅲ	-16.5	11.3	43.623	78.2684	587.544	263.7	200	Motuzaite Matuzeviciute G, Lightfoot E, O’Connell TC, et al (2015) The extent of cereal cultivation among the Bronze Age to Turkic period societies of Kazakhstan determined using stable isotope analysis of bone collagen. Journal of Archaeological Science 59:23–34. https://doi.org/10.1016/j.jas.2015.03.029
315	Karatuma	EIA-Ⅲ	-15.1	12.5	43.623	78.2684	587.544	263.7	200	Motuzaite Matuzeviciute G, Lightfoot E, O’Connell TC, et al (2015) The extent of cereal cultivation among the Bronze Age to Turkic period societies of Kazakhstan determined using stable isotope analysis of bone collagen. Journal of Archaeological Science 59:23–34. https://doi.org/10.1016/j.jas.2015.03.029
316	Karatuma	EIA-Ⅲ	-13.5	11.9	43.623	78.2684	587.544	263.7	200	Motuzaite Matuzeviciute G, Lightfoot E, O’Connell TC, et al (2015) The extent of cereal cultivation among the Bronze Age to Turkic period societies of Kazakhstan determined using stable isotope analysis of bone collagen. Journal of Archaeological Science 59:23–34. https://doi.org/10.1016/j.jas.2015.03.029
317	Karatuma	EIA-Ⅲ	-15.7	11.4	43.623	78.2684	587.544	263.7	200	Motuzaite Matuzeviciute G, Lightfoot E, O’Connell TC, et al (2015) The extent of cereal cultivation among the Bronze Age to Turkic period societies of Kazakhstan determined using stable isotope analysis of bone collagen. Journal of Archaeological Science 59:23–34. https://doi.org/10.1016/j.jas.2015.03.029
318	Karatuma	EIA-Ⅲ	-16.8	13.7	43.623	78.2684	587.544	263.7	200	Motuzaite Matuzeviciute G, Lightfoot E, O’Connell TC, et al (2015) The extent of cereal cultivation among the Bronze Age to Turkic period societies of Kazakhstan determined using stable isotope analysis of bone collagen. Journal of Archaeological Science 59:23–34. https://doi.org/10.1016/j.jas.2015.03.029
319	Karatuma	EIA-Ⅲ	-15.2	8.8	43.623	78.2684	587.544	263.7	200	Motuzaite Matuzeviciute G, Lightfoot E, O’Connell TC, et al (2015) The extent of cereal cultivation among the Bronze Age to Turkic period societies of Kazakhstan determined using stable isotope analysis of bone collagen. Journal of Archaeological Science 59:23–34. https://doi.org/10.1016/j.jas.2015.03.029
320	Kargaly-I	EIA-Ⅲ	-13.6	12.4	43.0998	76.2211	1379.39	353.4	158	Motuzaite Matuzeviciute G, Lightfoot E, O’Connell TC, et al (2015) The extent of cereal cultivation among the Bronze Age to Turkic period societies of Kazakhstan determined using stable isotope analysis of bone collagen. Journal of Archaeological Science 59:23–34. https://doi.org/10.1016/j.jas.2015.03.029
321	Kargaly-I	EIA-Ⅲ	-15.5	12.5	43.0998	76.2211	1379.39	353.4	158	Motuzaite Matuzeviciute G, Lightfoot E, O’Connell TC, et al (2015) The extent of cereal cultivation among the Bronze Age to Turkic period societies of Kazakhstan determined using stable isotope analysis of bone collagen. Journal of Archaeological Science 59:23–34. https://doi.org/10.1016/j.jas.2015.03.029
322	Kargaly-I	EIA-Ⅲ	-15	12	43.0998	76.2211	1379.39	353.4	158	Motuzaite Matuzeviciute G, Lightfoot E, O’Connell TC, et al (2015) The extent of cereal cultivation among the Bronze Age to Turkic period societies of Kazakhstan determined using stable isotope analysis of bone collagen. Journal of Archaeological Science 59:23–34. https://doi.org/10.1016/j.jas.2015.03.029
323	Alatau-1	EIA-Ⅲ	-16.2	10.9	43.164	77.0231	1593.32	710.2	133	Motuzaite Matuzeviciute G, Lightfoot E, O’Connell TC, et al (2015) The extent of cereal cultivation among the Bronze Age to Turkic period societies of Kazakhstan determined using stable isotope analysis of bone collagen. Journal of Archaeological Science 59:23–34. https://doi.org/10.1016/j.jas.2015.03.029
324	Alatau-1	EIA-Ⅲ	-17.3	10	43.164	77.0231	1593.32	710.2	133	Motuzaite Matuzeviciute G, Lightfoot E, O’Connell TC, et al (2015) The extent of cereal cultivation among the Bronze Age to Turkic period societies of Kazakhstan determined using stable isotope analysis of bone collagen. Journal of Archaeological Science 59:23–34. https://doi.org/10.1016/j.jas.2015.03.029
325	Kamenka	EIA-Ⅲ	-16	10.3	43.0798	76.8309	2595.27	400.5	64	Motuzaite Matuzeviciute G, Lightfoot E, O’Connell TC, et al (2015) The extent of cereal cultivation among the Bronze Age to Turkic period societies of Kazakhstan determined using stable isotope analysis of bone collagen. Journal of Archaeological Science 59:23–34. https://doi.org/10.1016/j.jas.2015.03.029
326	Kamenka	EIA-Ⅲ	-15.3	9.7	43.0798	76.8309	2595.27	400.5	64	Motuzaite Matuzeviciute G, Lightfoot E, O’Connell TC, et al (2015) The extent of cereal cultivation among the Bronze Age to Turkic period societies of Kazakhstan determined using stable isotope analysis of bone collagen. Journal of Archaeological Science 59:23–34. https://doi.org/10.1016/j.jas.2015.03.029
327	Kainarbulak-1	EIA-Ⅲ	-14.2	13.4	42.4877	69.2272	308.844	247.5	217	Motuzaite Matuzeviciute G, Lightfoot E, O’Connell TC, et al (2015) The extent of cereal cultivation among the Bronze Age to Turkic period societies of Kazakhstan determined using stable isotope analysis of bone collagen. Journal of Archaeological Science 59:23–34. https://doi.org/10.1016/j.jas.2015.03.029
328	Kainarbulak-1	EIA-Ⅲ	-13	13.6	42.4877	69.2272	308.844	247.5	217	Motuzaite Matuzeviciute G, Lightfoot E, O’Connell TC, et al (2015) The extent of cereal cultivation among the Bronze Age to Turkic period societies of Kazakhstan determined using stable isotope analysis of bone collagen. Journal of Archaeological Science 59:23–34. https://doi.org/10.1016/j.jas.2015.03.029
329	Kainarbulak-1	EIA-Ⅲ	-12.7	12.4	42.4877	69.2272	308.844	247.5	217	Motuzaite Matuzeviciute G, Lightfoot E, O’Connell TC, et al (2015) The extent of cereal cultivation among the Bronze Age to Turkic period societies of Kazakhstan determined using stable isotope analysis of bone collagen. Journal of Archaeological Science 59:23–34. https://doi.org/10.1016/j.jas.2015.03.029
330	Kainarbulak-1	EIA-Ⅲ	-13.9	11.1	42.4877	69.2272	308.844	247.5	217	Motuzaite Matuzeviciute G, Lightfoot E, O’Connell TC, et al (2015) The extent of cereal cultivation among the Bronze Age to Turkic period societies of Kazakhstan determined using stable isotope analysis of bone collagen. Journal of Archaeological Science 59:23–34. https://doi.org/10.1016/j.jas.2015.03.029
331	Kainarbulak-1	EIA-Ⅲ	-12.6	13.1	42.4877	69.2272	308.844	247.5	217	Motuzaite Matuzeviciute G, Lightfoot E, O’Connell TC, et al (2015) The extent of cereal cultivation among the Bronze Age to Turkic period societies of Kazakhstan determined using stable isotope analysis of bone collagen. Journal of Archaeological Science 59:23–34. https://doi.org/10.1016/j.jas.2015.03.029
332	Kainarbulak-2	EIA-Ⅲ	-10.5	10.4	42.4877	69.2272	308.844	247.5	217	Motuzaite Matuzeviciute G, Lightfoot E, O’Connell TC, et al (2015) The extent of cereal cultivation among the Bronze Age to Turkic period societies of Kazakhstan determined using stable isotope analysis of bone collagen. Journal of Archaeological Science 59:23–34. https://doi.org/10.1016/j.jas.2015.03.029
333	Kainarbulak-2	EIA-Ⅲ	-10.9	11.7	42.4877	69.2272	308.844	247.5	217	Motuzaite Matuzeviciute G, Lightfoot E, O’Connell TC, et al (2015) The extent of cereal cultivation among the Bronze Age to Turkic period societies of Kazakhstan determined using stable isotope analysis of bone collagen. Journal of Archaeological Science 59:23–34. https://doi.org/10.1016/j.jas.2015.03.029
334	Kainar Bulak-1	EIA-Ⅲ	-11.1	10.51	42.4877	69.2272	308.844	247.5	217	Motuzaite Matuzeviciute G, Lightfoot E, O’Connell TC, et al (2015) The extent of cereal cultivation among the Bronze Age to Turkic period societies of Kazakhstan determined using stable isotope analysis of bone collagen. Journal of Archaeological Science 59:23–34. https://doi.org/10.1016/j.jas.2015.03.029
335	Kainarbulak-1	EIA-Ⅲ	-11.86	13.7	42.4877	69.2272	308.844	247.5	217	Motuzaite Matuzeviciute G, Lightfoot E, O’Connell TC, et al (2015) The extent of cereal cultivation among the Bronze Age to Turkic period societies of Kazakhstan determined using stable isotope analysis of bone collagen. Journal of Archaeological Science 59:23–34. https://doi.org/10.1016/j.jas.2015.03.029
336	Kainarbulak-1	EIA-Ⅲ	-11.79	10.39	42.4877	69.2272	308.844	247.5	217	Motuzaite Matuzeviciute G, Lightfoot E, O’Connell TC, et al (2015) The extent of cereal cultivation among the Bronze Age to Turkic period societies of Kazakhstan determined using stable isotope analysis of bone collagen. Journal of Archaeological Science 59:23–34. https://doi.org/10.1016/j.jas.2015.03.029
337	Kainar Bulak-1	EIA-Ⅲ	-14.52	11.97	42.4877	69.2272	308.844	247.5	217	Motuzaite Matuzeviciute G, Lightfoot E, O’Connell TC, et al (2015) The extent of cereal cultivation among the Bronze Age to Turkic period societies of Kazakhstan determined using stable isotope analysis of bone collagen. Journal of Archaeological Science 59:23–34. https://doi.org/10.1016/j.jas.2015.03.029
338	Kainarbulak-2	EIA-Ⅲ	-13	10.1	42.4877	69.2272	308.844	247.5	217	Motuzaite Matuzeviciute G, Lightfoot E, O’Connell TC, et al (2015) The extent of cereal cultivation among the Bronze Age to Turkic period societies of Kazakhstan determined using stable isotope analysis of bone collagen. Journal of Archaeological Science 59:23–34. https://doi.org/10.1016/j.jas.2015.03.029
339	Kainarbulak-1	EIA-Ⅲ	-12.68	12.03	42.4877	69.2272	308.844	247.5	217	Motuzaite Matuzeviciute G, Lightfoot E, O’Connell TC, et al (2015) The extent of cereal cultivation among the Bronze Age to Turkic period societies of Kazakhstan determined using stable isotope analysis of bone collagen. Journal of Archaeological Science 59:23–34. https://doi.org/10.1016/j.jas.2015.03.029
340	Kainarbulak-1	EIA-Ⅲ	-11.28	12.54	42.4877	69.2272	308.844	247.5	217	Motuzaite Matuzeviciute G, Lightfoot E, O’Connell TC, et al (2015) The extent of cereal cultivation among the Bronze Age to Turkic period societies of Kazakhstan determined using stable isotope analysis of bone collagen. Journal of Archaeological Science 59:23–34. https://doi.org/10.1016/j.jas.2015.03.029
341	Kainarbulak-1	EIA-Ⅲ	-15.39	14.72	42.4877	69.2272	308.844	247.5	217	Motuzaite Matuzeviciute G, Lightfoot E, O’Connell TC, et al (2015) The extent of cereal cultivation among the Bronze Age to Turkic period societies of Kazakhstan determined using stable isotope analysis of bone collagen. Journal of Archaeological Science 59:23–34. https://doi.org/10.1016/j.jas.2015.03.029
342	Kargaly-I	EIA-Ⅲ	-13.56	12.36	43.0998	76.2211	1379.39	353.4	158	Motuzaite Matuzeviciute G, Lightfoot E, O’Connell TC, et al (2015) The extent of cereal cultivation among the Bronze Age to Turkic period societies of Kazakhstan determined using stable isotope analysis of bone collagen. Journal of Archaeological Science 59:23–34. https://doi.org/10.1016/j.jas.2015.03.029
343	Kargaly-I	EIA-Ⅲ	-15.47	12.45	43.0998	76.2211	1379.39	353.4	158	Motuzaite Matuzeviciute G, Lightfoot E, O’Connell TC, et al (2015) The extent of cereal cultivation among the Bronze Age to Turkic period societies of Kazakhstan determined using stable isotope analysis of bone collagen. Journal of Archaeological Science 59:23–34. https://doi.org/10.1016/j.jas.2015.03.029
344	Kargaly-I	EIA-Ⅲ	-14.16	10.35	43.0998	76.2211	1379.39	353.4	158	Motuzaite Matuzeviciute G, Lightfoot E, O’Connell TC, et al (2015) The extent of cereal cultivation among the Bronze Age to Turkic period societies of Kazakhstan determined using stable isotope analysis of bone collagen. Journal of Archaeological Science 59:23–34. https://doi.org/10.1016/j.jas.2015.03.029
345	Kargaly-I	EIA-Ⅲ	-15.01	11.99	43.0998	76.2211	1379.39	353.4	158	Motuzaite Matuzeviciute G, Lightfoot E, O’Connell TC, et al (2015) The extent of cereal cultivation among the Bronze Age to Turkic period societies of Kazakhstan determined using stable isotope analysis of bone collagen. Journal of Archaeological Science 59:23–34. https://doi.org/10.1016/j.jas.2015.03.029
346	Alatau-1	EIA-Ⅲ	-16.18	10.9	43.164	77.0231	1593.32	710.2	133	Motuzaite Matuzeviciute G, Lightfoot E, O’Connell TC, et al (2015) The extent of cereal cultivation among the Bronze Age to Turkic period societies of Kazakhstan determined using stable isotope analysis of bone collagen. Journal of Archaeological Science 59:23–34. https://doi.org/10.1016/j.jas.2015.03.029
347	Alatau-1	EIA-Ⅲ	-17.27	9.97	43.164	77.0231	1593.32	710.2	133	Motuzaite Matuzeviciute G, Lightfoot E, O’Connell TC, et al (2015) The extent of cereal cultivation among the Bronze Age to Turkic period societies of Kazakhstan determined using stable isotope analysis of bone collagen. Journal of Archaeological Science 59:23–34. https://doi.org/10.1016/j.jas.2015.03.029
348	Alatau-1	EIA-Ⅲ	-15.9	11.59	43.164	77.0231	1593.32	710.2	133	Motuzaite Matuzeviciute G, Lightfoot E, O’Connell TC, et al (2015) The extent of cereal cultivation among the Bronze Age to Turkic period societies of Kazakhstan determined using stable isotope analysis of bone collagen. Journal of Archaeological Science 59:23–34. https://doi.org/10.1016/j.jas.2015.03.029
349	Kamenka	EIA-Ⅲ	-15.99	10.33	43.0798	76.8309	2595.27	400.5	64	Motuzaite Matuzeviciute G, Lightfoot E, O’Connell TC, et al (2015) The extent of cereal cultivation among the Bronze Age to Turkic period societies of Kazakhstan determined using stable isotope analysis of bone collagen. Journal of Archaeological Science 59:23–34. https://doi.org/10.1016/j.jas.2015.03.029
350	Kamenka	EIA-Ⅲ	-15.31	9.66	43.0798	76.8309	2595.27	400.5	64	Motuzaite Matuzeviciute G, Lightfoot E, O’Connell TC, et al (2015) The extent of cereal cultivation among the Bronze Age to Turkic period societies of Kazakhstan determined using stable isotope analysis of bone collagen. Journal of Archaeological Science 59:23–34. https://doi.org/10.1016/j.jas.2015.03.029
351	Kamenka	EIA-Ⅲ	-15.55	12.28	43.0798	76.8309	2595.27	400.5	64	Motuzaite Matuzeviciute G, Lightfoot E, O’Connell TC, et al (2015) The extent of cereal cultivation among the Bronze Age to Turkic period societies of Kazakhstan determined using stable isotope analysis of bone collagen. Journal of Archaeological Science 59:23–34. https://doi.org/10.1016/j.jas.2015.03.029
352	Khatau-1	EIA-Ⅲ	-15	15.86	44.3861	73.8745	595.15	132.4	190	Motuzaite Matuzeviciute G, Lightfoot E, O’Connell TC, et al (2015) The extent of cereal cultivation among the Bronze Age to Turkic period societies of Kazakhstan determined using stable isotope analysis of bone collagen. Journal of Archaeological Science 59:23–34. https://doi.org/10.1016/j.jas.2015.03.029
353	Shymkent	EIA-Ⅲ	-11.28	10.67	42.3092	69.4799	419.814	314.2	214	Motuzaite Matuzeviciute G, Lightfoot E, O’Connell TC, et al (2015) The extent of cereal cultivation among the Bronze Age to Turkic period societies of Kazakhstan determined using stable isotope analysis of bone collagen. Journal of Archaeological Science 59:23–34. https://doi.org/10.1016/j.jas.2015.03.029
354	Podgornoye Ozero	EIA-Ⅲ	-14.7	11.7	54.5141	90.9809	555.867	293.2	117	Svyatko SV, Schulting RJ, Papin D, Reimer PJ (2021) MILLET CONSUMPTION IN SIBERIA PRIOR TO MID-SECOND MILLENNIUM BC? A REVIEW OF RECENT DEVELOPMENTS. Radiocarbon 63:1547–1554. https://doi.org/10.1017/RDC.2021.53
355	Kamenka	EIA-Ⅲ	-15.6	12.3	43.0798	76.8309	2595.27	400.5	64	Motuzaite Matuzeviciute G, Lightfoot E, O’Connell TC, et al (2015) The extent of cereal cultivation among the Bronze Age to Turkic period societies of Kazakhstan determined using stable isotope analysis of bone collagen. Journal of Archaeological Science 59:23–34. https://doi.org/10.1016/j.jas.2015.03.029
356	Alatau-1	EIA-Ⅲ	-15.9	11.6	43.164	77.0231	1593.32	710.2	133	Motuzaite Matuzeviciute G, Lightfoot E, O’Connell TC, et al (2015) The extent of cereal cultivation among the Bronze Age to Turkic period societies of Kazakhstan determined using stable isotope analysis of bone collagen. Journal of Archaeological Science 59:23–34. https://doi.org/10.1016/j.jas.2015.03.029
357	Kargaly-I	EIA-Ⅲ	-14.2	10.4	43.0998	76.2211	1379.39	353.4	158	Motuzaite Matuzeviciute G, Lightfoot E, O’Connell TC, et al (2015) The extent of cereal cultivation among the Bronze Age to Turkic period societies of Kazakhstan determined using stable isotope analysis of bone collagen. Journal of Archaeological Science 59:23–34. https://doi.org/10.1016/j.jas.2015.03.029
358	Chernoye Ozero I	EIA-Ⅲ	-14.4	10.7	53.1683	91.1084	492.483	408.3	130	Svyatko SV, Schulting RJ, Papin D, Reimer PJ (2021) MILLET CONSUMPTION IN SIBERIA PRIOR TO MID-SECOND MILLENNIUM BC? A REVIEW OF RECENT DEVELOPMENTS. Radiocarbon 63:1547–1554. https://doi.org/10.1017/RDC.2021.53
359	Kainarbulak-1	EIA-Ⅲ	-11.2	12.9	42.4877	69.2272	308.844	247.5	217	Motuzaite Matuzeviciute G, Lightfoot E, O’Connell TC, et al (2015) The extent of cereal cultivation among the Bronze Age to Turkic period societies of Kazakhstan determined using stable isotope analysis of bone collagen. Journal of Archaeological Science 59:23–34. https://doi.org/10.1016/j.jas.2015.03.029
360	Chandman Mountain	EIA-Ⅲ	-16.7	13.9	49.9971	92.054	923.386	157	147	Wilkin S, Ventresca Miller A, Miller BK, et al (2020) Economic Diversification Supported the Growth of Mongolia’s Nomadic Empires. Sci Rep 10:3916. https://doi.org/10.1038/s41598-020-60194-0
361	Chernoye Ozero I	EIA-Ⅲ	-14.4	12.4	53.1683	91.1084	492.483	408.3	130	Svyatko SV, Schulting RJ, Papin D, Reimer PJ (2021) MILLET CONSUMPTION IN SIBERIA PRIOR TO MID-SECOND MILLENNIUM BC? A REVIEW OF RECENT DEVELOPMENTS. Radiocarbon 63:1547–1554. https://doi.org/10.1017/RDC.2021.53
362	Khoit Tsenkher, Tarvagatain Am	EIA-Ⅲ	-17.4	13.8	47.06	91.8425	2257.94	123	88	Wilkin S, Ventresca Miller A, Miller BK, et al (2020) Economic Diversification Supported the Growth of Mongolia’s Nomadic Empires. Sci Rep 10:3916. https://doi.org/10.1038/s41598-020-60194-0
363	Chernoye Ozero I	EIA-Ⅲ	-12.5	11.8	53.1683	91.1084	492.483	408.3	130	Svyatko SV, Schulting RJ, Papin D, Reimer PJ (2021) MILLET CONSUMPTION IN SIBERIA PRIOR TO MID-SECOND MILLENNIUM BC? A REVIEW OF RECENT DEVELOPMENTS. Radiocarbon 63:1547–1554. https://doi.org/10.1017/RDC.2021.53
364	Karatobe	EIA-Ⅲ	-17.64	15.24	49.9738	79.4624	279.056	169.6	157	Ananyevskaya E, Aytqaly AK, Beisenov AZ, et al (2018) Early indicators to C4 plant consumption in central Kazakhstan during the Final Bronze Age and Early Iron Age based on stable isotope analysis of human and animal bone collagen. Archaeological Research in Asia 15:157–173. https://doi.org/10.1016/j.ara.2017.12.002
365	Karatobe	EIA-Ⅲ	-15.99	13.29	49.9738	79.4624	279.056	169.6	157	Ananyevskaya E, Aytqaly AK, Beisenov AZ, et al (2018) Early indicators to C4 plant consumption in central Kazakhstan during the Final Bronze Age and Early Iron Age based on stable isotope analysis of human and animal bone collagen. Archaeological Research in Asia 15:157–173. https://doi.org/10.1016/j.ara.2017.12.002
366	Karatobe	EIA-Ⅲ	-17.84	14.73	49.9738	79.4624	279.056	169.6	157	Ananyevskaya E, Aytqaly AK, Beisenov AZ, et al (2018) Early indicators to C4 plant consumption in central Kazakhstan during the Final Bronze Age and Early Iron Age based on stable isotope analysis of human and animal bone collagen. Archaeological Research in Asia 15:157–173. https://doi.org/10.1016/j.ara.2017.12.002
367	Shombuuzyn-Belchir (SBR)	EIA-Ⅲ	-17.41	13.99	46.9117	91.9603	2469.15	151	47	Ventresca-Miller AR, Wilkin S, Smithers R, et al (2023) Adaptability of Millets and Landscapes: Ancient Cultivation in North-Central Asia. Agronomy 13:. https://doi.org/10.3390/agronomy13112848
368	Shombuuzyn-Belchir (SBR)	EIA-Ⅲ	-17.37	15.25	46.9117	91.9603	2469.15	151	47	Ventresca-Miller AR, Wilkin S, Smithers R, et al (2023) Adaptability of Millets and Landscapes: Ancient Cultivation in North-Central Asia. Agronomy 13:. https://doi.org/10.3390/agronomy13112848
369	Shombuuzyn-Belchir (SBR)	EIA-Ⅲ	-17.6	14.05	46.9117	91.9603	2469.15	151	47	Ventresca-Miller AR, Wilkin S, Smithers R, et al (2023) Adaptability of Millets and Landscapes: Ancient Cultivation in North-Central Asia. Agronomy 13:. https://doi.org/10.3390/agronomy13112848
370	Shombuuzyn-Belchir (SBR)	EIA-Ⅲ	-17.51	13.09	46.9117	91.9603	2469.15	151	47	Ventresca-Miller AR, Wilkin S, Smithers R, et al (2023) Adaptability of Millets and Landscapes: Ancient Cultivation in North-Central Asia. Agronomy 13:. https://doi.org/10.3390/agronomy13112848
371	Shombuuzyn-Belchir (SBR)	EIA-Ⅲ	-17.8	14.5	46.9117	91.9603	2469.15	151	47	Ventresca-Miller AR, Wilkin S, Smithers R, et al (2023) Adaptability of Millets and Landscapes: Ancient Cultivation in North-Central Asia. Agronomy 13:. https://doi.org/10.3390/agronomy13112848
372	Shombuuzyn-Belchir (SBR)	EIA-Ⅲ	-17.5	14.14	46.9117	91.9603	2469.15	151	47	Ventresca-Miller AR, Wilkin S, Smithers R, et al (2023) Adaptability of Millets and Landscapes: Ancient Cultivation in North-Central Asia. Agronomy 13:. https://doi.org/10.3390/agronomy13112848
373	Shombuuzyn-Belchir (SBR)	EIA-Ⅲ	-17.16	13.99	46.9117	91.9603	2469.15	151	47	Ventresca-Miller AR, Wilkin S, Smithers R, et al (2023) Adaptability of Millets and Landscapes: Ancient Cultivation in North-Central Asia. Agronomy 13:. https://doi.org/10.3390/agronomy13112848
374	Shombuuzyn-Belchir (SBR)	EIA-Ⅲ	-16.96	13.5	46.9117	91.9603	2469.15	151	47	Ventresca-Miller AR, Wilkin S, Smithers R, et al (2023) Adaptability of Millets and Landscapes: Ancient Cultivation in North-Central Asia. Agronomy 13:. https://doi.org/10.3390/agronomy13112848
375	Takhiltyn-Khotgor (THL)	EIA-Ⅲ	-16.94	13.82	47.405	92.1111	1460.52	150.4	139	Ventresca-Miller AR, Wilkin S, Smithers R, et al (2023) Adaptability of Millets and Landscapes: Ancient Cultivation in North-Central Asia. Agronomy 13:. https://doi.org/10.3390/agronomy13112848
376	Takhiltyn-Khotgor (THL)	EIA-Ⅲ	-17.16	13.78	47.405	92.1111	1460.52	150.4	139	Ventresca-Miller AR, Wilkin S, Smithers R, et al (2023) Adaptability of Millets and Landscapes: Ancient Cultivation in North-Central Asia. Agronomy 13:. https://doi.org/10.3390/agronomy13112848
377	Takhiltyn-Khotgor (THL)	EIA-Ⅲ	-17.3	13.79	47.405	92.1111	1460.52	150.4	139	Ventresca-Miller AR, Wilkin S, Smithers R, et al (2023) Adaptability of Millets and Landscapes: Ancient Cultivation in North-Central Asia. Agronomy 13:. https://doi.org/10.3390/agronomy13112848
378	Takhiltyn-Khotgor (THL)	EIA-Ⅲ	-17.79	12.4	47.405	92.1111	1460.52	150.4	139	Ventresca-Miller AR, Wilkin S, Smithers R, et al (2023) Adaptability of Millets and Landscapes: Ancient Cultivation in North-Central Asia. Agronomy 13:. https://doi.org/10.3390/agronomy13112848
379	Takhiltyn-Khotgor (THL)	EIA-Ⅲ	-16.45	13.13	47.405	92.1111	1460.52	150.4	139	Ventresca-Miller AR, Wilkin S, Smithers R, et al (2023) Adaptability of Millets and Landscapes: Ancient Cultivation in North-Central Asia. Agronomy 13:. https://doi.org/10.3390/agronomy13112848
380	Takhiltyn-Khotgor (THL)	EIA-Ⅲ	-16.78	13.23	47.405	92.1111	1460.52	150.4	139	Ventresca-Miller AR, Wilkin S, Smithers R, et al (2023) Adaptability of Millets and Landscapes: Ancient Cultivation in North-Central Asia. Agronomy 13:. https://doi.org/10.3390/agronomy13112848
381	Kainar Bulak-1	EIA-Ⅲ	-13.1	11.47	42.4877	69.2272	308.844	247.5	217	Motuzaite Matuzeviciute G, Lightfoot E, O’Connell TC, et al (2015) The extent of cereal cultivation among the Bronze Age to Turkic period societies of Kazakhstan determined using stable isotope analysis of bone collagen. Journal of Archaeological Science 59:23–34. https://doi.org/10.1016/j.jas.2015.03.029
382	Shihuyao	EIA-Ⅲ	-14.25	12.8	44.1341	86.0829	746.904	245.1	179	Wang W, Duan F, Zhang J, et al (2023) Gender differences in millet consumption in arid Inner Asia during the Iron Age documented by stable isotopes: A case study from Shihuyao, Xinjiang. Quaternary Science Reviews 312:108187. https://doi.org/10.1016/j.quascirev.2023.108187
383	Shihuyao	EIA-Ⅲ	-12.69	12.79	44.1341	86.0829	746.904	245.1	179	Wang W, Duan F, Zhang J, et al (2023) Gender differences in millet consumption in arid Inner Asia during the Iron Age documented by stable isotopes: A case study from Shihuyao, Xinjiang. Quaternary Science Reviews 312:108187. https://doi.org/10.1016/j.quascirev.2023.108187
384	Shihuyao	EIA-Ⅲ	-14.3	12.63	44.1341	86.0829	746.904	245.1	179	Wang W, Duan F, Zhang J, et al (2023) Gender differences in millet consumption in arid Inner Asia during the Iron Age documented by stable isotopes: A case study from Shihuyao, Xinjiang. Quaternary Science Reviews 312:108187. https://doi.org/10.1016/j.quascirev.2023.108187
385	Shihuyao	EIA-Ⅲ	-11.68	13.21	44.1341	86.0829	746.904	245.1	179	Wang W, Duan F, Zhang J, et al (2023) Gender differences in millet consumption in arid Inner Asia during the Iron Age documented by stable isotopes: A case study from Shihuyao, Xinjiang. Quaternary Science Reviews 312:108187. https://doi.org/10.1016/j.quascirev.2023.108187
386	Shihuyao	EIA-Ⅲ	-12.47	13.01	44.1341	86.0829	746.904	245.1	179	Wang W, Duan F, Zhang J, et al (2023) Gender differences in millet consumption in arid Inner Asia during the Iron Age documented by stable isotopes: A case study from Shihuyao, Xinjiang. Quaternary Science Reviews 312:108187. https://doi.org/10.1016/j.quascirev.2023.108187
387	Shihuyao	EIA-Ⅲ	-15.03	12.1	44.1341	86.0829	746.904	245.1	179	Wang W, Duan F, Zhang J, et al (2023) Gender differences in millet consumption in arid Inner Asia during the Iron Age documented by stable isotopes: A case study from Shihuyao, Xinjiang. Quaternary Science Reviews 312:108187. https://doi.org/10.1016/j.quascirev.2023.108187
388	Shihuyao	EIA-Ⅲ	-15.07	12.03	44.1341	86.0829	746.904	245.1	179	Wang W, Duan F, Zhang J, et al (2023) Gender differences in millet consumption in arid Inner Asia during the Iron Age documented by stable isotopes: A case study from Shihuyao, Xinjiang. Quaternary Science Reviews 312:108187. https://doi.org/10.1016/j.quascirev.2023.108187
389	Shihuyao	EIA-Ⅲ	-14.29	11.99	44.1341	86.0829	746.904	245.1	179	Wang W, Duan F, Zhang J, et al (2023) Gender differences in millet consumption in arid Inner Asia during the Iron Age documented by stable isotopes: A case study from Shihuyao, Xinjiang. Quaternary Science Reviews 312:108187. https://doi.org/10.1016/j.quascirev.2023.108187
390	Shihuyao	EIA-Ⅲ	-14.11	12.65	44.1341	86.0829	746.904	245.1	179	Wang W, Duan F, Zhang J, et al (2023) Gender differences in millet consumption in arid Inner Asia during the Iron Age documented by stable isotopes: A case study from Shihuyao, Xinjiang. Quaternary Science Reviews 312:108187. https://doi.org/10.1016/j.quascirev.2023.108187
391	Shihuyao	EIA-Ⅲ	-12.89	11.61	44.1341	86.0829	746.904	245.1	179	Wang W, Duan F, Zhang J, et al (2023) Gender differences in millet consumption in arid Inner Asia during the Iron Age documented by stable isotopes: A case study from Shihuyao, Xinjiang. Quaternary Science Reviews 312:108187. https://doi.org/10.1016/j.quascirev.2023.108187
392	Shihuyao	EIA-Ⅲ	-13.36	12.57	44.1341	86.0829	746.904	245.1	179	Wang W, Duan F, Zhang J, et al (2023) Gender differences in millet consumption in arid Inner Asia during the Iron Age documented by stable isotopes: A case study from Shihuyao, Xinjiang. Quaternary Science Reviews 312:108187. https://doi.org/10.1016/j.quascirev.2023.108187
393	Shihuyao	EIA-Ⅲ	-12.92	11.49	44.1341	86.0829	746.904	245.1	179	Wang W, Duan F, Zhang J, et al (2023) Gender differences in millet consumption in arid Inner Asia during the Iron Age documented by stable isotopes: A case study from Shihuyao, Xinjiang. Quaternary Science Reviews 312:108187. https://doi.org/10.1016/j.quascirev.2023.108187
394	Shihuyao	EIA-Ⅲ	-10.99	13.22	44.1341	86.0829	746.904	245.1	179	Wang W, Duan F, Zhang J, et al (2023) Gender differences in millet consumption in arid Inner Asia during the Iron Age documented by stable isotopes: A case study from Shihuyao, Xinjiang. Quaternary Science Reviews 312:108187. https://doi.org/10.1016/j.quascirev.2023.108187
395	Shihuyao	EIA-Ⅲ	-12.44	12.56	44.1341	86.0829	746.904	245.1	179	Wang W, Duan F, Zhang J, et al (2023) Gender differences in millet consumption in arid Inner Asia during the Iron Age documented by stable isotopes: A case study from Shihuyao, Xinjiang. Quaternary Science Reviews 312:108187. https://doi.org/10.1016/j.quascirev.2023.108187
396	Shihuyao	EIA-Ⅲ	-13.8	12.69	44.1341	86.0829	746.904	245.1	179	Wang W, Duan F, Zhang J, et al (2023) Gender differences in millet consumption in arid Inner Asia during the Iron Age documented by stable isotopes: A case study from Shihuyao, Xinjiang. Quaternary Science Reviews 312:108187. https://doi.org/10.1016/j.quascirev.2023.108187
397	Shihuyao	EIA-Ⅲ	-13.4	12.74	44.1341	86.0829	746.904	245.1	179	Wang W, Duan F, Zhang J, et al (2023) Gender differences in millet consumption in arid Inner Asia during the Iron Age documented by stable isotopes: A case study from Shihuyao, Xinjiang. Quaternary Science Reviews 312:108187. https://doi.org/10.1016/j.quascirev.2023.108187
398	Shihuyao	EIA-Ⅲ	-11.34	12.79	44.1341	86.0829	746.904	245.1	179	Wang W, Duan F, Zhang J, et al (2023) Gender differences in millet consumption in arid Inner Asia during the Iron Age documented by stable isotopes: A case study from Shihuyao, Xinjiang. Quaternary Science Reviews 312:108187. https://doi.org/10.1016/j.quascirev.2023.108187
399	Shihuyao	EIA-Ⅲ	-13.78	12.81	44.1341	86.0829	746.904	245.1	179	Wang W, Duan F, Zhang J, et al (2023) Gender differences in millet consumption in arid Inner Asia during the Iron Age documented by stable isotopes: A case study from Shihuyao, Xinjiang. Quaternary Science Reviews 312:108187. https://doi.org/10.1016/j.quascirev.2023.108187
400	Shihuyao	EIA-Ⅲ	-12.23	12.54	44.1341	86.0829	746.904	245.1	179	Wang W, Duan F, Zhang J, et al (2023) Gender differences in millet consumption in arid Inner Asia during the Iron Age documented by stable isotopes: A case study from Shihuyao, Xinjiang. Quaternary Science Reviews 312:108187. https://doi.org/10.1016/j.quascirev.2023.108187
401	Shihuyao	EIA-Ⅲ	-17.41	10.69	44.1341	86.0829	746.904	245.1	179	Wang W, Duan F, Zhang J, et al (2023) Gender differences in millet consumption in arid Inner Asia during the Iron Age documented by stable isotopes: A case study from Shihuyao, Xinjiang. Quaternary Science Reviews 312:108187. https://doi.org/10.1016/j.quascirev.2023.108187
402	Shihuyao	EIA-Ⅲ	-11.83	13.74	44.1341	86.0829	746.904	245.1	179	Wang W, Duan F, Zhang J, et al (2023) Gender differences in millet consumption in arid Inner Asia during the Iron Age documented by stable isotopes: A case study from Shihuyao, Xinjiang. Quaternary Science Reviews 312:108187. https://doi.org/10.1016/j.quascirev.2023.108187
403	Shihuyao	EIA-Ⅲ	-12.52	13.38	44.1341	86.0829	746.904	245.1	179	Wang W, Duan F, Zhang J, et al (2023) Gender differences in millet consumption in arid Inner Asia during the Iron Age documented by stable isotopes: A case study from Shihuyao, Xinjiang. Quaternary Science Reviews 312:108187. https://doi.org/10.1016/j.quascirev.2023.108187
404	Shihuyao	EIA-Ⅲ	-12.33	12.44	44.1341	86.0829	746.904	245.1	179	Wang W, Duan F, Zhang J, et al (2023) Gender differences in millet consumption in arid Inner Asia during the Iron Age documented by stable isotopes: A case study from Shihuyao, Xinjiang. Quaternary Science Reviews 312:108187. https://doi.org/10.1016/j.quascirev.2023.108187
405	Shihuyao	EIA-Ⅲ	-12.72	11.9	44.1341	86.0829	746.904	245.1	179	Wang W, Duan F, Zhang J, et al (2023) Gender differences in millet consumption in arid Inner Asia during the Iron Age documented by stable isotopes: A case study from Shihuyao, Xinjiang. Quaternary Science Reviews 312:108187. https://doi.org/10.1016/j.quascirev.2023.108187
406	Shihuyao	EIA-Ⅲ	-12.16	14.11	44.1341	86.0829	746.904	245.1	179	Wang W, Duan F, Zhang J, et al (2023) Gender differences in millet consumption in arid Inner Asia during the Iron Age documented by stable isotopes: A case study from Shihuyao, Xinjiang. Quaternary Science Reviews 312:108187. https://doi.org/10.1016/j.quascirev.2023.108187
407	Shihuyao	EIA-Ⅲ	-10.53	13.2	44.1341	86.0829	746.904	245.1	179	Wang W, Duan F, Zhang J, et al (2023) Gender differences in millet consumption in arid Inner Asia during the Iron Age documented by stable isotopes: A case study from Shihuyao, Xinjiang. Quaternary Science Reviews 312:108187. https://doi.org/10.1016/j.quascirev.2023.108187
408	Shihuyao	EIA-Ⅲ	-13.4	12.14	44.1341	86.0829	746.904	245.1	179	Wang W, Duan F, Zhang J, et al (2023) Gender differences in millet consumption in arid Inner Asia during the Iron Age documented by stable isotopes: A case study from Shihuyao, Xinjiang. Quaternary Science Reviews 312:108187. https://doi.org/10.1016/j.quascirev.2023.108187
409	Shihuyao	EIA-Ⅲ	-12.09	13.02	44.1341	86.0829	746.904	245.1	179	Wang W, Duan F, Zhang J, et al (2023) Gender differences in millet consumption in arid Inner Asia during the Iron Age documented by stable isotopes: A case study from Shihuyao, Xinjiang. Quaternary Science Reviews 312:108187. https://doi.org/10.1016/j.quascirev.2023.108187
410	Shihuyao	EIA-Ⅲ	-14.39	12.29	44.1341	86.0829	746.904	245.1	179	Wang W, Duan F, Zhang J, et al (2023) Gender differences in millet consumption in arid Inner Asia during the Iron Age documented by stable isotopes: A case study from Shihuyao, Xinjiang. Quaternary Science Reviews 312:108187. https://doi.org/10.1016/j.quascirev.2023.108187
411	Shihuyao	EIA-Ⅲ	-13.29	12.15	44.1341	86.0829	746.904	245.1	179	Wang W, Duan F, Zhang J, et al (2023) Gender differences in millet consumption in arid Inner Asia during the Iron Age documented by stable isotopes: A case study from Shihuyao, Xinjiang. Quaternary Science Reviews 312:108187. https://doi.org/10.1016/j.quascirev.2023.108187
412	Shihuyao	EIA-Ⅲ	-11.95	12.33	44.1341	86.0829	746.904	245.1	179	Wang W, Duan F, Zhang J, et al (2023) Gender differences in millet consumption in arid Inner Asia during the Iron Age documented by stable isotopes: A case study from Shihuyao, Xinjiang. Quaternary Science Reviews 312:108187. https://doi.org/10.1016/j.quascirev.2023.108187
413	Shihuyao	EIA-Ⅲ	-11.66	12.33	44.1341	86.0829	746.904	245.1	179	Wang W, Duan F, Zhang J, et al (2023) Gender differences in millet consumption in arid Inner Asia during the Iron Age documented by stable isotopes: A case study from Shihuyao, Xinjiang. Quaternary Science Reviews 312:108187. https://doi.org/10.1016/j.quascirev.2023.108187
414	Shihuyao	EIA-Ⅲ	-13.28	12.53	44.1341	86.0829	746.904	245.1	179	Wang W, Duan F, Zhang J, et al (2023) Gender differences in millet consumption in arid Inner Asia during the Iron Age documented by stable isotopes: A case study from Shihuyao, Xinjiang. Quaternary Science Reviews 312:108187. https://doi.org/10.1016/j.quascirev.2023.108187
415	Shihuyao	EIA-Ⅲ	-11.27	12.61	44.1341	86.0829	746.904	245.1	179	Wang W, Duan F, Zhang J, et al (2023) Gender differences in millet consumption in arid Inner Asia during the Iron Age documented by stable isotopes: A case study from Shihuyao, Xinjiang. Quaternary Science Reviews 312:108187. https://doi.org/10.1016/j.quascirev.2023.108187
416	Shihuyao	EIA-Ⅲ	-11.46	12.79	44.1341	86.0829	746.904	245.1	179	Wang W, Duan F, Zhang J, et al (2023) Gender differences in millet consumption in arid Inner Asia during the Iron Age documented by stable isotopes: A case study from Shihuyao, Xinjiang. Quaternary Science Reviews 312:108187. https://doi.org/10.1016/j.quascirev.2023.108187
417	Shihuyao	EIA-Ⅲ	-13.9	12.9	44.1341	86.0829	746.904	245.1	179	Wang W, Duan F, Zhang J, et al (2023) Gender differences in millet consumption in arid Inner Asia during the Iron Age documented by stable isotopes: A case study from Shihuyao, Xinjiang. Quaternary Science Reviews 312:108187. https://doi.org/10.1016/j.quascirev.2023.108187
418	Shihuyao	EIA-Ⅲ	-9.74	12.37	44.1341	86.0829	746.904	245.1	179	Wang W, Duan F, Zhang J, et al (2023) Gender differences in millet consumption in arid Inner Asia during the Iron Age documented by stable isotopes: A case study from Shihuyao, Xinjiang. Quaternary Science Reviews 312:108187. https://doi.org/10.1016/j.quascirev.2023.108187
419	Dongheigou	EIA-Ⅲ	-18.74	12.31	43.5202	93.2291	2370.82	331	84	Xue L, Xi C, Jian-xin W, et al (2013) Carbon and nitrogen isotopic analysis of human bones excavated from the Dongheigou site, Ba Li-kun County, Xinjiang Autonomous Region. Acta Anthropologica Sinica 32:219
420	Dongheigou	EIA-Ⅲ	-18.78	13.01	43.5202	93.2291	2370.82	331	84	Xue L, Xi C, Jian-xin W, et al (2013) Carbon and nitrogen isotopic analysis of human bones excavated from the Dongheigou site, Ba Li-kun County, Xinjiang Autonomous Region. Acta Anthropologica Sinica 32:219
421	Dongheigou	EIA-Ⅲ	-18.96	14.33	43.5202	93.2291	2370.82	331	84	Xue L, Xi C, Jian-xin W, et al (2013) Carbon and nitrogen isotopic analysis of human bones excavated from the Dongheigou site, Ba Li-kun County, Xinjiang Autonomous Region. Acta Anthropologica Sinica 32:219
422	Dongheigou	EIA-Ⅲ	-18.42	14.3	43.5202	93.2291	2370.82	331	84	Xue L, Xi C, Jian-xin W, et al (2013) Carbon and nitrogen isotopic analysis of human bones excavated from the Dongheigou site, Ba Li-kun County, Xinjiang Autonomous Region. Acta Anthropologica Sinica 32:219
423	Dongheigou	EIA-Ⅲ	-18.21	13.25	43.5202	93.2291	2370.82	331	84	Xue L, Xi C, Jian-xin W, et al (2013) Carbon and nitrogen isotopic analysis of human bones excavated from the Dongheigou site, Ba Li-kun County, Xinjiang Autonomous Region. Acta Anthropologica Sinica 32:219
424	Dongheigou	EIA-Ⅲ	-18.64	13.27	43.5202	93.2291	2370.82	331	84	Xue L, Xi C, Jian-xin W, et al (2013) Carbon and nitrogen isotopic analysis of human bones excavated from the Dongheigou site, Ba Li-kun County, Xinjiang Autonomous Region. Acta Anthropologica Sinica 32:219
425	Dongheigou	EIA-Ⅲ	-18.35	12.64	43.5202	93.2291	2370.82	331	84	Xue L, Xi C, Jian-xin W, et al (2013) Carbon and nitrogen isotopic analysis of human bones excavated from the Dongheigou site, Ba Li-kun County, Xinjiang Autonomous Region. Acta Anthropologica Sinica 32:219
426	Xiaxinguang	EIA-Ⅲ	-18.3231	12.618	42.862	86.4424	2082.82	298.8	108	This study
427	Xiaxinguang	EIA-Ⅲ	-18.4243	5.73044	42.862	86.4424	2082.82	298.8	108	This study
428	Xiaxinguang	EIA-Ⅲ	-16.6022	12.5161	42.862	86.4424	2082.82	298.8	108	This study
429	Xiaxinguang	EIA-Ⅲ	-18.57	13.4372	42.862	86.4424	2082.82	298.8	108	This study
430	Xiaxinguang	EIA-Ⅲ	-16.8534	12.5845	42.862	86.4424	2082.82	298.8	108	This study
431	Xiaxinguang	EIA-Ⅲ	-17.7502	12.7147	42.862	86.4424	2082.82	298.8	108	This study
432	Xiaxinguang	EIA-Ⅲ	-17.4995	12.6731	42.862	86.4424	2082.82	298.8	108	This study
433	Xiaxinguang	EIA-Ⅲ	-17.6727	10.7724	42.862	86.4424	2082.82	298.8	108	This study
434	Xiaxinguang	EIA-Ⅲ	-18.0654	12.5547	42.862	86.4424	2082.82	298.8	108	This study
435	Xiaxinguang	EIA-Ⅲ	-17.6759	12.6842	42.862	86.4424	2082.82	298.8	108	This study
436	Xiaxinguang	EIA-Ⅲ	-17.9677	12.5106	42.862	86.4424	2082.82	298.8	108	This study
437	Xiaxinguang	EIA-Ⅲ	-16.7115	16.0551	42.862	86.4424	2082.82	298.8	108	This study
438	Xiaxinguang	EIA-Ⅲ	-18.1242	12.0802	42.862	86.4424	2082.82	298.8	108	This study
439	Xiaxinguang	EIA-Ⅲ	-18.285	12.2568	42.862	86.4424	2082.82	298.8	108	This study
440	Yanghai	EIA-Ⅲ	-16.2	12.9	42.8	89.65	-42.9101	5.2	229	Si Y, Lu E, Li X, et al (2013) Xinjiang Yanghai mudi xianmin de shiwu jiegou ji renqun zucheng tansuo (新疆洋海墓地先民的食物结构及人群组成探索 / Dietary Structure and Population Composition of the Ancient Inhabitants of the Yanghai Cemetery, Xinjiang). Kexue tongbao (科学通报 / Chinese Science Bulletin) 58:1422–1429
441	Yanghai	EIA-Ⅲ	-16	13.2	42.8	89.65	-42.9101	5.2	229	Si Y, Lu E, Li X, et al (2013) Xinjiang Yanghai mudi xianmin de shiwu jiegou ji renqun zucheng tansuo (新疆洋海墓地先民的食物结构及人群组成探索 / Dietary Structure and Population Composition of the Ancient Inhabitants of the Yanghai Cemetery, Xinjiang). Kexue tongbao (科学通报 / Chinese Science Bulletin) 58:1422–1429
442	Yanghai	EIA-Ⅲ	-15.9	12.1	42.8	89.65	-42.9101	5.2	229	Si Y, Lu E, Li X, et al (2013) Xinjiang Yanghai mudi xianmin de shiwu jiegou ji renqun zucheng tansuo (新疆洋海墓地先民的食物结构及人群组成探索 / Dietary Structure and Population Composition of the Ancient Inhabitants of the Yanghai Cemetery, Xinjiang). Kexue tongbao (科学通报 / Chinese Science Bulletin) 58:1422–1429
443	Yanghai	EIA-Ⅲ	-14.6	13.8	42.8	89.65	-42.9101	5.2	229	Si Y, Lu E, Li X, et al (2013) Xinjiang Yanghai mudi xianmin de shiwu jiegou ji renqun zucheng tansuo (新疆洋海墓地先民的食物结构及人群组成探索 / Dietary Structure and Population Composition of the Ancient Inhabitants of the Yanghai Cemetery, Xinjiang). Kexue tongbao (科学通报 / Chinese Science Bulletin) 58:1422–1429
444	Yanghai	EIA-Ⅲ	-14.8	13	42.8	89.65	-42.9101	5.2	229	Si Y, Lu E, Li X, et al (2013) Xinjiang Yanghai mudi xianmin de shiwu jiegou ji renqun zucheng tansuo (新疆洋海墓地先民的食物结构及人群组成探索 / Dietary Structure and Population Composition of the Ancient Inhabitants of the Yanghai Cemetery, Xinjiang). Kexue tongbao (科学通报 / Chinese Science Bulletin) 58:1422–1429
445	Yanghai	EIA-Ⅲ	-16.4	12.6	42.8	89.65	-42.9101	5.2	229	Si Y, Lu E, Li X, et al (2013) Xinjiang Yanghai mudi xianmin de shiwu jiegou ji renqun zucheng tansuo (新疆洋海墓地先民的食物结构及人群组成探索 / Dietary Structure and Population Composition of the Ancient Inhabitants of the Yanghai Cemetery, Xinjiang). Kexue tongbao (科学通报 / Chinese Science Bulletin) 58:1422–1429
446	Yanghai	EIA-Ⅲ	-15.8	13	42.8	89.65	-42.9101	5.2	229	Si Y, Lu E, Li X, et al (2013) Xinjiang Yanghai mudi xianmin de shiwu jiegou ji renqun zucheng tansuo (新疆洋海墓地先民的食物结构及人群组成探索 / Dietary Structure and Population Composition of the Ancient Inhabitants of the Yanghai Cemetery, Xinjiang). Kexue tongbao (科学通报 / Chinese Science Bulletin) 58:1422–1429
447	Yanghai	EIA-Ⅲ	-15.2	15.7	42.8	89.65	-42.9101	5.2	229	Si Y, Lu E, Li X, et al (2013) Xinjiang Yanghai mudi xianmin de shiwu jiegou ji renqun zucheng tansuo (新疆洋海墓地先民的食物结构及人群组成探索 / Dietary Structure and Population Composition of the Ancient Inhabitants of the Yanghai Cemetery, Xinjiang). Kexue tongbao (科学通报 / Chinese Science Bulletin) 58:1422–1429
448	Yanghai	EIA-Ⅲ	-17.5	13.1	42.8	89.65	-42.9101	5.2	229	Si Y, Lu E, Li X, et al (2013) Xinjiang Yanghai mudi xianmin de shiwu jiegou ji renqun zucheng tansuo (新疆洋海墓地先民的食物结构及人群组成探索 / Dietary Structure and Population Composition of the Ancient Inhabitants of the Yanghai Cemetery, Xinjiang). Kexue tongbao (科学通报 / Chinese Science Bulletin) 58:1422–1429
449	Temirlanovka	Medieval	-13.65	13.2	42.6645	69.249	330.494	248.2	214	Motuzaite Matuzeviciute G, Lightfoot E, O’Connell TC, et al (2015) The extent of cereal cultivation among the Bronze Age to Turkic period societies of Kazakhstan determined using stable isotope analysis of bone collagen. Journal of Archaeological Science 59:23–34. https://doi.org/10.1016/j.jas.2015.03.029
450	Temirlanovka	Medieval	-12.6	12.01	42.6645	69.249	330.494	248.2	214	Motuzaite Matuzeviciute G, Lightfoot E, O’Connell TC, et al (2015) The extent of cereal cultivation among the Bronze Age to Turkic period societies of Kazakhstan determined using stable isotope analysis of bone collagen. Journal of Archaeological Science 59:23–34. https://doi.org/10.1016/j.jas.2015.03.029
451	Temirlanovka	Medieval	-13.18	13.18	42.6645	69.249	330.494	248.2	214	Motuzaite Matuzeviciute G, Lightfoot E, O’Connell TC, et al (2015) The extent of cereal cultivation among the Bronze Age to Turkic period societies of Kazakhstan determined using stable isotope analysis of bone collagen. Journal of Archaeological Science 59:23–34. https://doi.org/10.1016/j.jas.2015.03.029
452	Temirlanovka	Medieval	-14.6	13.98	42.6645	69.249	330.494	248.2	214	Motuzaite Matuzeviciute G, Lightfoot E, O’Connell TC, et al (2015) The extent of cereal cultivation among the Bronze Age to Turkic period societies of Kazakhstan determined using stable isotope analysis of bone collagen. Journal of Archaeological Science 59:23–34. https://doi.org/10.1016/j.jas.2015.03.029
453	Afanasyeva Gora	Medieval	-16.7	12.8	54.6636	90.8481	384.644	265.3	128	Svyatko SV, Schulting RJ, Papin D, Reimer PJ (2021) MILLET CONSUMPTION IN SIBERIA PRIOR TO MID-SECOND MILLENNIUM BC? A REVIEW OF RECENT DEVELOPMENTS. Radiocarbon 63:1547–1554. https://doi.org/10.1017/RDC.2021.53
454	Karatal	Medieval	-16.2	12.39	44.9474	77.5015	480.21	171.1	189	Hermes TR, Frachetti MD, Bullion EA, et al (2018) Urban and nomadic isotopic niches reveal dietary connectivities along Central Asia’s Silk Roads. Scientific Reports 8:5177
455	Tashbulak	Medieval	-19.08	10.93	39.6355	68.4166	1832.74	251.5	143	Hermes TR, Frachetti MD, Bullion EA, et al (2018) Urban and nomadic isotopic niches reveal dietary connectivities along Central Asia’s Silk Roads. Scientific Reports 8:5177
456	Tashbulak	Medieval	-18.34	10.07	39.6355	68.4166	1832.74	251.5	143	Hermes TR, Frachetti MD, Bullion EA, et al (2018) Urban and nomadic isotopic niches reveal dietary connectivities along Central Asia’s Silk Roads. Scientific Reports 8:5177
457	Tashbulak	Medieval	-17.54	9.33	39.6355	68.4166	1832.74	251.5	143	Hermes TR, Frachetti MD, Bullion EA, et al (2018) Urban and nomadic isotopic niches reveal dietary connectivities along Central Asia’s Silk Roads. Scientific Reports 8:5177
458	Tashbulak	Medieval	-17.9	9.54	39.6355	68.4166	1832.74	251.5	143	Hermes TR, Frachetti MD, Bullion EA, et al (2018) Urban and nomadic isotopic niches reveal dietary connectivities along Central Asia’s Silk Roads. Scientific Reports 8:5177
459	Karatal	Medieval	-18.11	12.65	44.9474	77.5015	480.21	171.1	189	Hermes TR, Frachetti MD, Bullion EA, et al (2018) Urban and nomadic isotopic niches reveal dietary connectivities along Central Asia’s Silk Roads. Scientific Reports 8:5177
460	Karatal	Medieval	-17.98	13.86	44.9474	77.5015	480.21	171.1	189	Hermes TR, Frachetti MD, Bullion EA, et al (2018) Urban and nomadic isotopic niches reveal dietary connectivities along Central Asia’s Silk Roads. Scientific Reports 8:5177
461	Konyr-Tebe-1	Medieval	-15.3	12.7	42.9398	68.2605	193.664	134	217	Motuzaite Matuzeviciute G, Lightfoot E, O’Connell TC, et al (2015) The extent of cereal cultivation among the Bronze Age to Turkic period societies of Kazakhstan determined using stable isotope analysis of bone collagen. Journal of Archaeological Science 59:23–34. https://doi.org/10.1016/j.jas.2015.03.029
462	Konyr-Tebe-1	Medieval	-13.8	11.5	42.9398	68.2605	193.664	134	217	Motuzaite Matuzeviciute G, Lightfoot E, O’Connell TC, et al (2015) The extent of cereal cultivation among the Bronze Age to Turkic period societies of Kazakhstan determined using stable isotope analysis of bone collagen. Journal of Archaeological Science 59:23–34. https://doi.org/10.1016/j.jas.2015.03.029
463	Konyr-Tebe-1	Medieval	-12.4	12.9	42.9398	68.2605	193.664	134	217	Motuzaite Matuzeviciute G, Lightfoot E, O’Connell TC, et al (2015) The extent of cereal cultivation among the Bronze Age to Turkic period societies of Kazakhstan determined using stable isotope analysis of bone collagen. Journal of Archaeological Science 59:23–34. https://doi.org/10.1016/j.jas.2015.03.029
464	Konyr-Tebe-1	Medieval	-19.1	12.1	42.9398	68.2605	193.664	134	217	Motuzaite Matuzeviciute G, Lightfoot E, O’Connell TC, et al (2015) The extent of cereal cultivation among the Bronze Age to Turkic period societies of Kazakhstan determined using stable isotope analysis of bone collagen. Journal of Archaeological Science 59:23–34. https://doi.org/10.1016/j.jas.2015.03.029
465	Konyr-Tebe-1	Medieval	-18.2	10.7	42.9398	68.2605	193.664	134	217	Motuzaite Matuzeviciute G, Lightfoot E, O’Connell TC, et al (2015) The extent of cereal cultivation among the Bronze Age to Turkic period societies of Kazakhstan determined using stable isotope analysis of bone collagen. Journal of Archaeological Science 59:23–34. https://doi.org/10.1016/j.jas.2015.03.029
466	Konyr-Tebe-1	Medieval	-17.4	11.1	42.9398	68.2605	193.664	134	217	Motuzaite Matuzeviciute G, Lightfoot E, O’Connell TC, et al (2015) The extent of cereal cultivation among the Bronze Age to Turkic period societies of Kazakhstan determined using stable isotope analysis of bone collagen. Journal of Archaeological Science 59:23–34. https://doi.org/10.1016/j.jas.2015.03.029
467	Konyr-Tebe-1	Medieval	-16.8	12.1	42.9398	68.2605	193.664	134	217	Motuzaite Matuzeviciute G, Lightfoot E, O’Connell TC, et al (2015) The extent of cereal cultivation among the Bronze Age to Turkic period societies of Kazakhstan determined using stable isotope analysis of bone collagen. Journal of Archaeological Science 59:23–34. https://doi.org/10.1016/j.jas.2015.03.029
468	Konyr-Tebe-1	Medieval	-18.7	12.8	42.9398	68.2605	193.664	134	217	Motuzaite Matuzeviciute G, Lightfoot E, O’Connell TC, et al (2015) The extent of cereal cultivation among the Bronze Age to Turkic period societies of Kazakhstan determined using stable isotope analysis of bone collagen. Journal of Archaeological Science 59:23–34. https://doi.org/10.1016/j.jas.2015.03.029
469	Konyr-Tebe-1	Medieval	-18.6	11.9	42.9398	68.2605	193.664	134	217	Motuzaite Matuzeviciute G, Lightfoot E, O’Connell TC, et al (2015) The extent of cereal cultivation among the Bronze Age to Turkic period societies of Kazakhstan determined using stable isotope analysis of bone collagen. Journal of Archaeological Science 59:23–34. https://doi.org/10.1016/j.jas.2015.03.029
470	Turgen-2	Medieval	-16.65	11.72	43.3126	77.6757	1901.82	529.8	103	Motuzaite Matuzeviciute G, Lightfoot E, O’Connell TC, et al (2015) The extent of cereal cultivation among the Bronze Age to Turkic period societies of Kazakhstan determined using stable isotope analysis of bone collagen. Journal of Archaeological Science 59:23–34. https://doi.org/10.1016/j.jas.2015.03.029
471	Turgen-2	Medieval	-17.26	10.97	43.3126	77.6757	1901.82	529.8	103	Motuzaite Matuzeviciute G, Lightfoot E, O’Connell TC, et al (2015) The extent of cereal cultivation among the Bronze Age to Turkic period societies of Kazakhstan determined using stable isotope analysis of bone collagen. Journal of Archaeological Science 59:23–34. https://doi.org/10.1016/j.jas.2015.03.029
472	Turgen-2	Medieval	-15.05	11.86	43.3126	77.6757	1901.82	529.8	103	Motuzaite Matuzeviciute G, Lightfoot E, O’Connell TC, et al (2015) The extent of cereal cultivation among the Bronze Age to Turkic period societies of Kazakhstan determined using stable isotope analysis of bone collagen. Journal of Archaeological Science 59:23–34. https://doi.org/10.1016/j.jas.2015.03.029
473	Turgen-2	Medieval	-18.09	10.4	43.3126	77.6757	1901.82	529.8	103	Motuzaite Matuzeviciute G, Lightfoot E, O’Connell TC, et al (2015) The extent of cereal cultivation among the Bronze Age to Turkic period societies of Kazakhstan determined using stable isotope analysis of bone collagen. Journal of Archaeological Science 59:23–34. https://doi.org/10.1016/j.jas.2015.03.029
474	Turgen-2	Medieval	-15.46	11.69	43.3126	77.6757	1901.82	529.8	103	Motuzaite Matuzeviciute G, Lightfoot E, O’Connell TC, et al (2015) The extent of cereal cultivation among the Bronze Age to Turkic period societies of Kazakhstan determined using stable isotope analysis of bone collagen. Journal of Archaeological Science 59:23–34. https://doi.org/10.1016/j.jas.2015.03.029
475	Turgen-2	Medieval	-15.2	11.43	43.3126	77.6757	1901.82	529.8	103	Motuzaite Matuzeviciute G, Lightfoot E, O’Connell TC, et al (2015) The extent of cereal cultivation among the Bronze Age to Turkic period societies of Kazakhstan determined using stable isotope analysis of bone collagen. Journal of Archaeological Science 59:23–34. https://doi.org/10.1016/j.jas.2015.03.029
476	Turgen-2	Medieval	-15.55	11.76	43.3126	77.6757	1901.82	529.8	103	Motuzaite Matuzeviciute G, Lightfoot E, O’Connell TC, et al (2015) The extent of cereal cultivation among the Bronze Age to Turkic period societies of Kazakhstan determined using stable isotope analysis of bone collagen. Journal of Archaeological Science 59:23–34. https://doi.org/10.1016/j.jas.2015.03.029
477	Butakty-1	Medieval	-10.66	11.31	43.164	77.0231	1593.32	710.2	133	Motuzaite Matuzeviciute G, Lightfoot E, O’Connell TC, et al (2015) The extent of cereal cultivation among the Bronze Age to Turkic period societies of Kazakhstan determined using stable isotope analysis of bone collagen. Journal of Archaeological Science 59:23–34. https://doi.org/10.1016/j.jas.2015.03.029
478	Butakty-1	Medieval	-11.18	12.12	43.164	77.0231	1593.32	710.2	133	Motuzaite Matuzeviciute G, Lightfoot E, O’Connell TC, et al (2015) The extent of cereal cultivation among the Bronze Age to Turkic period societies of Kazakhstan determined using stable isotope analysis of bone collagen. Journal of Archaeological Science 59:23–34. https://doi.org/10.1016/j.jas.2015.03.029
479	Butakty-1	Medieval	-12.11	11.71	43.164	77.0231	1593.32	710.2	133	Motuzaite Matuzeviciute G, Lightfoot E, O’Connell TC, et al (2015) The extent of cereal cultivation among the Bronze Age to Turkic period societies of Kazakhstan determined using stable isotope analysis of bone collagen. Journal of Archaeological Science 59:23–34. https://doi.org/10.1016/j.jas.2015.03.029
480	Butakty-1	Medieval	-11.17	12.16	43.164	77.0231	1593.32	710.2	133	Motuzaite Matuzeviciute G, Lightfoot E, O’Connell TC, et al (2015) The extent of cereal cultivation among the Bronze Age to Turkic period societies of Kazakhstan determined using stable isotope analysis of bone collagen. Journal of Archaeological Science 59:23–34. https://doi.org/10.1016/j.jas.2015.03.029
481	Butakty-1	Medieval	-15.34	10.71	43.164	77.0231	1593.32	710.2	133	Motuzaite Matuzeviciute G, Lightfoot E, O’Connell TC, et al (2015) The extent of cereal cultivation among the Bronze Age to Turkic period societies of Kazakhstan determined using stable isotope analysis of bone collagen. Journal of Archaeological Science 59:23–34. https://doi.org/10.1016/j.jas.2015.03.029
482	Butakty-1	Medieval	-15.7	11.24	43.164	77.0231	1593.32	710.2	133	Motuzaite Matuzeviciute G, Lightfoot E, O’Connell TC, et al (2015) The extent of cereal cultivation among the Bronze Age to Turkic period societies of Kazakhstan determined using stable isotope analysis of bone collagen. Journal of Archaeological Science 59:23–34. https://doi.org/10.1016/j.jas.2015.03.029
483	Uturlik Tepe	Medieval	-16.82	13.29	40.5961	68.9309	270.762	331.6	243	Hermes TR, Frachetti MD, Bullion EA, et al (2018) Urban and nomadic isotopic niches reveal dietary connectivities along Central Asia’s Silk Roads. Scientific Reports 8:5177
484	Uturlik Tepe	Medieval	-17.11	12.56	40.5961	68.9309	270.762	331.6	243	Hermes TR, Frachetti MD, Bullion EA, et al (2018) Urban and nomadic isotopic niches reveal dietary connectivities along Central Asia’s Silk Roads. Scientific Reports 8:5177
485	Uturlik Tepe	Medieval	-18.16	11.85	40.5961	68.9309	270.762	331.6	243	Hermes TR, Frachetti MD, Bullion EA, et al (2018) Urban and nomadic isotopic niches reveal dietary connectivities along Central Asia’s Silk Roads. Scientific Reports 8:5177
486	Uturlik Tepe	Medieval	-18.22	12.51	40.5961	68.9309	270.762	331.6	243	Hermes TR, Frachetti MD, Bullion EA, et al (2018) Urban and nomadic isotopic niches reveal dietary connectivities along Central Asia’s Silk Roads. Scientific Reports 8:5177
487	Uturlik Tepe	Medieval	-16.02	13.89	40.5961	68.9309	270.762	331.6	243	Hermes TR, Frachetti MD, Bullion EA, et al (2018) Urban and nomadic isotopic niches reveal dietary connectivities along Central Asia’s Silk Roads. Scientific Reports 8:5177
488	Uturlik Tepe	Medieval	-17.19	13.5	40.5961	68.9309	270.762	331.6	243	Hermes TR, Frachetti MD, Bullion EA, et al (2018) Urban and nomadic isotopic niches reveal dietary connectivities along Central Asia’s Silk Roads. Scientific Reports 8:5177
489	Uturlik Tepe	Medieval	-17.07	12.05	40.5961	68.9309	270.762	331.6	243	Hermes TR, Frachetti MD, Bullion EA, et al (2018) Urban and nomadic isotopic niches reveal dietary connectivities along Central Asia’s Silk Roads. Scientific Reports 8:5177
490	Uturlik Tepe	Medieval	-18.03	12.7	40.5961	68.9309	270.762	331.6	243	Hermes TR, Frachetti MD, Bullion EA, et al (2018) Urban and nomadic isotopic niches reveal dietary connectivities along Central Asia’s Silk Roads. Scientific Reports 8:5177
491	Uturlik Tepe	Medieval	-18.71	12.64	40.5961	68.9309	270.762	331.6	243	Hermes TR, Frachetti MD, Bullion EA, et al (2018) Urban and nomadic isotopic niches reveal dietary connectivities along Central Asia’s Silk Roads. Scientific Reports 8:5177
492	Chartok	Medieval	-15.54	11.34	41.1416	71.8333	720.259	244.7	225	Hermes TR, Frachetti MD, Bullion EA, et al (2018) Urban and nomadic isotopic niches reveal dietary connectivities along Central Asia’s Silk Roads. Scientific Reports 8:5177
493	Chartok	Medieval	-14.79	10	41.1416	71.8333	720.259	244.7	225	Hermes TR, Frachetti MD, Bullion EA, et al (2018) Urban and nomadic isotopic niches reveal dietary connectivities along Central Asia’s Silk Roads. Scientific Reports 8:5177
494	Chartok	Medieval	-15.69	10.92	41.1416	71.8333	720.259	244.7	225	Hermes TR, Frachetti MD, Bullion EA, et al (2018) Urban and nomadic isotopic niches reveal dietary connectivities along Central Asia’s Silk Roads. Scientific Reports 8:5177
495	Chartok	Medieval	-16.64	11.24	41.1416	71.8333	720.259	244.7	225	Hermes TR, Frachetti MD, Bullion EA, et al (2018) Urban and nomadic isotopic niches reveal dietary connectivities along Central Asia’s Silk Roads. Scientific Reports 8:5177
496	Chartok	Medieval	-15.81	11.21	41.1416	71.8333	720.259	244.7	225	Hermes TR, Frachetti MD, Bullion EA, et al (2018) Urban and nomadic isotopic niches reveal dietary connectivities along Central Asia’s Silk Roads. Scientific Reports 8:5177
497	Chartok	Medieval	-16.71	10.46	41.1416	71.8333	720.259	244.7	225	Hermes TR, Frachetti MD, Bullion EA, et al (2018) Urban and nomadic isotopic niches reveal dietary connectivities along Central Asia’s Silk Roads. Scientific Reports 8:5177
498	Chartok	Medieval	-15.68	11.12	41.1416	71.8333	720.259	244.7	225	Hermes TR, Frachetti MD, Bullion EA, et al (2018) Urban and nomadic isotopic niches reveal dietary connectivities along Central Asia’s Silk Roads. Scientific Reports 8:5177
499	Chartok	Medieval	-16.1	10.77	41.1416	71.8333	720.259	244.7	225	Hermes TR, Frachetti MD, Bullion EA, et al (2018) Urban and nomadic isotopic niches reveal dietary connectivities along Central Asia’s Silk Roads. Scientific Reports 8:5177
500	Chartok	Medieval	-15.53	11.27	41.1416	71.8333	720.259	244.7	225	Hermes TR, Frachetti MD, Bullion EA, et al (2018) Urban and nomadic isotopic niches reveal dietary connectivities along Central Asia’s Silk Roads. Scientific Reports 8:5177
501	Chartok	Medieval	-15.52	10.59	41.1416	71.8333	720.259	244.7	225	Hermes TR, Frachetti MD, Bullion EA, et al (2018) Urban and nomadic isotopic niches reveal dietary connectivities along Central Asia’s Silk Roads. Scientific Reports 8:5177
502	Chartok	Medieval	-17.17	10.55	41.1416	71.8333	720.259	244.7	225	Hermes TR, Frachetti MD, Bullion EA, et al (2018) Urban and nomadic isotopic niches reveal dietary connectivities along Central Asia’s Silk Roads. Scientific Reports 8:5177
503	Frinkent	Medieval	-19.02	11.92	39.9582	66.6314	535.969	309.5	224	Hermes TR, Frachetti MD, Bullion EA, et al (2018) Urban and nomadic isotopic niches reveal dietary connectivities along Central Asia’s Silk Roads. Scientific Reports 8:5177
504	Frinkent	Medieval	-17.61	11.2	39.9582	66.6314	535.969	309.5	224	Hermes TR, Frachetti MD, Bullion EA, et al (2018) Urban and nomadic isotopic niches reveal dietary connectivities along Central Asia’s Silk Roads. Scientific Reports 8:5177
505	Frinkent	Medieval	-18.66	11.43	39.9582	66.6314	535.969	309.5	224	Hermes TR, Frachetti MD, Bullion EA, et al (2018) Urban and nomadic isotopic niches reveal dietary connectivities along Central Asia’s Silk Roads. Scientific Reports 8:5177
506	Frinkent	Medieval	-17.38	11.17	39.9582	66.6314	535.969	309.5	224	Hermes TR, Frachetti MD, Bullion EA, et al (2018) Urban and nomadic isotopic niches reveal dietary connectivities along Central Asia’s Silk Roads. Scientific Reports 8:5177
507	Altyntepe	Medieval	-17.56	9.14	38.7765	66.54	570.294	515.3	239	Hermes TR, Frachetti MD, Bullion EA, et al (2018) Urban and nomadic isotopic niches reveal dietary connectivities along Central Asia’s Silk Roads. Scientific Reports 8:5177
508	Chor Dona	Medieval	-16.97	10.85	40.66	72.3497	672.568	259.1	228	Hermes TR, Frachetti MD, Bullion EA, et al (2018) Urban and nomadic isotopic niches reveal dietary connectivities along Central Asia’s Silk Roads. Scientific Reports 8:5177
509	Chor Dona	Medieval	-17.1	9.91	40.66	72.3497	672.568	259.1	228	Hermes TR, Frachetti MD, Bullion EA, et al (2018) Urban and nomadic isotopic niches reveal dietary connectivities along Central Asia’s Silk Roads. Scientific Reports 8:5177
510	Chor Dona	Medieval	-18.33	10.09	40.66	72.3497	672.568	259.1	228	Hermes TR, Frachetti MD, Bullion EA, et al (2018) Urban and nomadic isotopic niches reveal dietary connectivities along Central Asia’s Silk Roads. Scientific Reports 8:5177
511	Chor Dona	Medieval	-16.68	11.71	40.66	72.3497	672.568	259.1	228	Hermes TR, Frachetti MD, Bullion EA, et al (2018) Urban and nomadic isotopic niches reveal dietary connectivities along Central Asia’s Silk Roads. Scientific Reports 8:5177
512	Tahiltyn Khotgot	Medieval	-17.1719	14.7811	47.06	91.8425	2257.94	123	88	Wilkin S, Ventresca Miller A, Miller BK, et al (2020) Economic Diversification Supported the Growth of Mongolia’s Nomadic Empires. Sci Rep 10:3916. https://doi.org/10.1038/s41598-020-60194-0
513	Aigyrzhal 1	Medieval	-18.56	13.26	41.4492	75.8844	2207.58	218	136	Matuzeviciute GM, Ananyevskaya E, Sakalauskaite J, et al (2022) The integration of millet into the diet of Central Asian populations in the third millennium BC. Antiquity 96:560–574. https://doi.org/10.15184/aqy.2022.23
514	Aigyrzhal 1	Medieval	-18.28	12.89	41.4492	75.8844	2207.58	218	136	Matuzeviciute GM, Ananyevskaya E, Sakalauskaite J, et al (2022) The integration of millet into the diet of Central Asian populations in the third millennium BC. Antiquity 96:560–574. https://doi.org/10.15184/aqy.2022.23
515	Aigyrzhal 1	Medieval	-17.84	12.53	41.4492	75.8844	2207.58	218	136	Matuzeviciute GM, Ananyevskaya E, Sakalauskaite J, et al (2022) The integration of millet into the diet of Central Asian populations in the third millennium BC. Antiquity 96:560–574. https://doi.org/10.15184/aqy.2022.23
516	Aigyrzhal 1	Medieval	-18.22	12.34	41.4492	75.8844	2207.58	218	136	Matuzeviciute GM, Ananyevskaya E, Sakalauskaite J, et al (2022) The integration of millet into the diet of Central Asian populations in the third millennium BC. Antiquity 96:560–574. https://doi.org/10.15184/aqy.2022.23
517	Aigyrzhal 1	Medieval	-15.61	13.16	41.4492	75.8844	2207.58	218	136	Matuzeviciute GM, Ananyevskaya E, Sakalauskaite J, et al (2022) The integration of millet into the diet of Central Asian populations in the third millennium BC. Antiquity 96:560–574. https://doi.org/10.15184/aqy.2022.23
518	Aigyrzhal 1	Medieval	-15.33	13.29	41.4492	75.8844	2207.58	218	136	Matuzeviciute GM, Ananyevskaya E, Sakalauskaite J, et al (2022) The integration of millet into the diet of Central Asian populations in the third millennium BC. Antiquity 96:560–574. https://doi.org/10.15184/aqy.2022.23
519	Aigyrzhal 1	Medieval	-18.47	12.57	41.4492	75.8844	2207.58	218	136	Matuzeviciute GM, Ananyevskaya E, Sakalauskaite J, et al (2022) The integration of millet into the diet of Central Asian populations in the third millennium BC. Antiquity 96:560–574. https://doi.org/10.15184/aqy.2022.23
520	Aigyrzhal 1	Medieval	-18.29	17.31	41.4492	75.8844	2207.58	218	136	Matuzeviciute GM, Ananyevskaya E, Sakalauskaite J, et al (2022) The integration of millet into the diet of Central Asian populations in the third millennium BC. Antiquity 96:560–574. https://doi.org/10.15184/aqy.2022.23
521	Aigyrzhal 1	Medieval	-18.65	12.57	41.4492	75.8844	2207.58	218	136	Matuzeviciute GM, Ananyevskaya E, Sakalauskaite J, et al (2022) The integration of millet into the diet of Central Asian populations in the third millennium BC. Antiquity 96:560–574. https://doi.org/10.15184/aqy.2022.23
522	Aigyrzhal 1	Medieval	-19.92	15.2	41.4492	75.8844	2207.58	218	136	Matuzeviciute GM, Ananyevskaya E, Sakalauskaite J, et al (2022) The integration of millet into the diet of Central Asian populations in the third millennium BC. Antiquity 96:560–574. https://doi.org/10.15184/aqy.2022.23
523	Aigyrzhal 1	Medieval	-18.01	11.72	41.4492	75.8844	2207.58	218	136	Matuzeviciute GM, Ananyevskaya E, Sakalauskaite J, et al (2022) The integration of millet into the diet of Central Asian populations in the third millennium BC. Antiquity 96:560–574. https://doi.org/10.15184/aqy.2022.23
524	Aigyrzhal 1	Medieval	-18.55	12.39	41.4492	75.8844	2207.58	218	136	Matuzeviciute GM, Ananyevskaya E, Sakalauskaite J, et al (2022) The integration of millet into the diet of Central Asian populations in the third millennium BC. Antiquity 96:560–574. https://doi.org/10.15184/aqy.2022.23
525	Kok-Tash	Medieval	-16.91	13.8	42.2203	75.6266	1868.85	218.8	143	Matuzeviciute GM, Ananyevskaya E, Sakalauskaite J, et al (2022) The integration of millet into the diet of Central Asian populations in the third millennium BC. Antiquity 96:560–574. https://doi.org/10.15184/aqy.2022.23

## Sheet: Isopote dataset for fig. 6
code	Site name	Periods	Latitude	Longitude	average C13
1	Tegiszhol	EIA-I	50.0942	72.7653	-17.9545
2	Myrzhyk 6	EIA-I	48.6767	73.4285	-16.79
3	Akbeit	EIA-I	49.0045	73.8931	-17.95
4	Karashoky	EIA-I	49.0045	73.8931	-17.3
5	Karakemer	EIA-I	48.6538	74.8374	-17.88
6	Tandaily	EIA-I	48.9978	75.0203	-19.47
7	Baike 2	EIA-I	48.9635	75.164	-19.08
8	Jierzankale	EIA-I	37.8706	75.2261	-17.9166
9	Bakybulak	EIA-I	48.2295	75.3501	-18.35
10	Kyzylshilik	EIA-I	50.2002	75.6344	-22.1
11	Chap I	EIA-I	42.2271	75.8868	-17.02
12	Zevakinskiy	EIA-I	50.2249	81.8368	-12.8
13	Duogang	EIA-I	41.8819	82.0564	-14.8866
14	Qiongkeke 1st cemetery	EIA-I	43.7507	82.6225	-16.235
15	Mohuchahan	EIA-I	42.4835	85.7098	-18.211
16	Wulasitai	EIA-I	42.8478	86.4217	-18.3607
17	Xiaxinguang	EIA-I	42.862	86.4424	-18.5595
18	Jiayi	EIA-I	42.8904	89.1755	-16.0175
19	Yanghai	EIA-I	42.8	89.65	-16.6
20	Okunev Ulus	EIA-I	53.5568	90.1951	-16
21	Verhniy Askiz I	EIA-I	53.1826	90.2114	-17.7
22	Uibat V	EIA-I	53.6507	90.3041	-15.9
23	Saragash Ozero	EIA-I	54.6908	90.7094	-18.8
24	Saragash	EIA-I	54.7189	90.7693	-16.05
25	Grishkin Log 1	EIA-I	54.5711	90.7826	-18.05
26	Ya'er	EIA-I	42.86	90.8344	-15.4
27	Podgornoye Ozero	EIA-I	54.5205	90.9145	-17.975
28	Yarki II	EIA-I	54.4352	91.0468	-17.95
29	Nurilkov Ulus	EIA-I	53.6085	91.4873	-13.2
30	Ailiekexia'er	EIA-I	42.7386	92.5867	-17.3
31	Dongheigou	EIA-I	43.5202	93.2291	-17.83
32	Chinge Tey I	EIA-I	52.0347	93.4771	-16.0058
1	Begash	EIA-II	44.7099	78.9442	-15
2	Karasuk III	EIA-II	54.5668	90.7498	-16.9
3	Kotyrkora	EIA-II	49.9234	79.2664	-17.8
4	Lepeshkina	EIA-II	54.6432	90.9981	-14.2
5	Melnichniy-Barsuchinniy Log	EIA-II	54.5507	90.9928	-17.2
6	Nurilkov Ulus	EIA-II	53.6085	91.4873	-18.3
7	Podgornoye Ozero	EIA-II	54.5205	90.9145	-12.8
8	Saragash	EIA-II	54.7189	90.7693	-16.4
9	Saragash Ozero	EIA-II	54.6908	90.7094	-17.7
10	Zhartas	EIA-II	49.5025	72.6594	-18.6
11	Dongheigou	EIA-II	43.5202	93.2291	-18
12	Duogang	EIA-II	41.8819	82.0564	-14.3
13	Heigouliang	EIA-II	43.5202	93.2291	-18.5
14	Kalasu	EIA-II	42.8044	80.3	-17
15	Tuwaxincun	EIA-II	48.5796	87.4633	-18.3
16	Wulasitai	EIA-II	42.8478	86.4217	-19.1
17	Xiaxinguang	EIA-II	42.862	86.4424	-18.4
18	Yanghai	EIA-II	42.8	89.65	-16.2
1	Alatau-1	EIA-III	43.164	77.0231	-16.458
2	Chandman Mountain	EIA-III	49.9971	92.054	-16.65
3	Chernoye Ozero I	EIA-III	53.1683	91.1084	-13.766
4	Kainarbulak-1	EIA-III	42.4877	69.2272	-12.5718
5	Kamenka	EIA-III	43.0798	76.8309	-15.625
6	Karatobe	EIA-III	49.9738	79.4624	-17.1566
7	Karatuma	EIA-III	43.623	78.2684	-15.4299
8	Kargaly-I	EIA-III	43.0998	76.2211	-14.5625
9	Khatau-1	EIA-III	44.3861	73.8745	-15
10	Khoit Tsenkher, Tarvagatain Am	EIA-III	47.06	91.8425	-17.4
11	Nurilkov Ulus	EIA-III	53.6085	91.4873	-11.8
12	Okunev Ulus	EIA-III	53.5568	90.1951	-18
13	Podgornoye Ozero	EIA-III	54.5141	90.9809	-14.7
14	Shombuuzyn-Belchir (SBR)	EIA-III	46.9117	91.9603	-17.4137
15	Shymkent	EIA-III	42.3092	69.4799	-11.28
16	Takhiltyn-Khotgor (THL)	EIA-III	47.405	92.1111	-17.07
17	Yarki I	EIA-III	54.5183	91.1088	-15.7
18	Wulasitai	EIA-III	42.8478	86.4217	-17.7764
19	Dongheigou	EIA-III	43.5202	93.2291	-18.5857
20	Shihuyao	EIA-III	44.1341	86.0829	-12.8911
21	Xiaxinguang	EIA-III	42.862	86.4424	-17.7518
22	Yanghai	EIA-III	42.8	89.65	-15.8222
1	Afanasyeva Gora	Historical period	54.6636	90.8481	-16.7
2	Aigyrzhal 1	Historical period	41.4492	75.8844	-17.9775
3	Altyntepe	Historical period	38.7765	66.54	-17.56
4	Butakty-1	Historical period	43.164	77.0231	-12.6933
5	Chartok	Historical period	41.1416	71.8333	-15.9254
6	Chor Dona	Historical period	40.66	72.3497	-17.27
7	Frinkent	Historical period	39.9582	66.6314	-18.1675
8	Karatal	Historical period	44.9474	77.5015	-17.43
9	Kok-Tash	Historical period	42.2203	75.6266	-16.91
10	Konyr-Tebe-1	Historical period	42.9398	68.2605	-16.7
11	Tahiltyn Khotgot	Historical period	47.06	91.8425	-17.1719
12	Tashbulak	Historical period	39.6355	68.4166	-18.215
13	Temirlanovka	Historical period	42.6645	69.249	-13.5075
14	Turgen-2	Historical period	43.3126	77.6757	-16.18
15	Uturlik Tepe	Historical period	40.5961	68.9309	-17.481
16	Wulasitai	Historical period	42.8478	86.4217	-17.7538
17	Xiaxinguang	Historical period	42.862	86.4424	-17.4457
