# Supplementary material
Source: Research Square preprint supplement (doi:10.21203/rs.3.rs-8836084/v1)
Supplement: Supplementary file 3 [file 6030f80b8322affa6b1cc6bb.docx]

The testing includes three main steps, pretreatment, graphitization and Accelerator Mass Spectrometer (AMS) testing, which details refer to Cao et al. (2023). All AMS radiocarbon dating was processed by the radiocarbon laboratory of Lanzhou University. In the pretreatment step, charcoal samples were ultrasonically cleaned and charred. After that, charcoal samples were treated with an acid solution (1 M HCl), an alkaline solution (0.5 M NaOH) and an acid solution (1 M HCl) again to remove carbonates, humic acids and the carbonate precipitate that may have been generated due to the reaction with atmospheric CO2 during the alkali reaction and again rinsing the sample with Milli-Q water to achieve neutral pH.

For bone samples, dense bones (∼1 g) were sectioned with an electric saw, and the surfaces of the bones were polished before cleaning in an ultrasonic bath. Then, bone samples were placed in an acid solution (0.5 M HCl) and an alkaline solution (0.125 M NaOH). After, samples were reacted in an acid solution (pH = 3, 75°C, 48 hr). The gelatin-like solution was filtered using a filter tube. Finally, the filtration was frozen and kept in a refrigerator for 2 days and then freeze-dried in a lyophilized to complete the collagen extraction process.

In the graphitization step, samples were graphitized by AGE III (Luckas Wacker et al. 2010; Cao et al. 2023). After graphitization, samples were analyzed by a mini carbon dating system (MICADAS, 200kV, Ionplus AG corporation). Details of the MICADAS and the analytical approaches refer to Synal, Stocker, and Suter (2007); Lukas Wacker et al. (2010); Cao et al. (2023). The test sequence was defined by the software package Chameleon, and the dating results were calculated using the BATS software (L. Wacker et al. 2010). Nemo software was used for real-time monitoring of the test data.

Carbon and nitrogen isiotops contents were measured using an Isoprime precisION stable isotope ratio mass spectrometer. The reactor temperature was maintained at 950 °C, with a carrier gas flow rate of 230 mL/min, oxygen flow rate of 30 mL/min, and reference gas flow rate of 3 mL/min. The system operated under a high voltage of 3594 V, magnetic field strength of 3600, and a vacuum level of 3.0 × 10⁻⁶ mbar, with an ion source current of 200 mA.

References

Cao H et al. 2023. Performance and inter-comparison tests of the MICADAS at the radiocarbon laboratory of Lanzhou University, China. Radiocarbon. 65(1):41–50

Synal H-A, Stocker M, Suter M. 2007. MICADAS: A new compact radiocarbon AMS system. Nuclear Instruments and Methods in Physics Research Section B: Beam Interactions with Materials and Atoms. 259(1):7–13

Wacker Lukas et al. 2010. MICADAS: routine and high-precision radiocarbon dating. Radiocarbon. 52(2):252–262

Wacker L., Christl M, Synal H-A. 2010. Bats: A new tool for AMS data reduction. Nuclear Instruments and Methods in Physics Research Section B: Beam Interactions with Materials and Atoms. 268(7–8):976–979

Wacker Luckas, Němec M, Bourquin J. 2010. A revolutionary graphitisation system: fully automated, compact and simple. Nuclear Instruments and Methods in Physics Research Section B: Beam Interactions with Materials and Atoms. 268(7–8):931–934
